# Supplementary material for: Design and synthesis of yellow- to red-emitting gold(iii) complexes containing isomeric thienopyridine and thienoquinoline moieties and their applications in operationally stable organic light-emitting devices
Source: Royal Society of Chemistry journal article supplement (doi:10.1039/d1mh00821h), 2021-09-02
Supplement: d1mh00821h1.pdf [file d1mh00821h1.pdf]

## Electronic Supplementary Information

### **Design and Synthesis of Yellow- to Red-Emitting Gold(III) Complexes Containing Isomeric Thienopyridine and Thienoquinoline Moieties and Their Applications in Operationally Stable Organic Light-Emitting Devices**

*Lok-Kwan Li, † Cathay Chai Au-Yeung, † Man-Chung Tang, Shiu-Lun Lai, Wai-Lung Cheung, Maggie Ng, Mei-Yee Chan, \* Vivian Wing-Wah Yam\**

[\*] Dr. L.-K. Li, Ms. C. C. A.-Y., Dr. M.-C. Tang, Dr. S.-L. Lai, Mr. W.-L. Cheung, Dr. M. Ng, Dr. M.-Y. Chan, \* Prof. V. W.-W. Yam \*

Institute of Molecular Functional Materials and Department of Chemistry, The University of Hong Kong, Pokfulam Road, Hong Kong (P. R. China)

Fax: +(852) 2857-1586; Tel: +(852) 2859-2153

E-mail: wwyam@hku.hk; chanmym@hku.hk

† L.-K.L. and C.C.A.Y. contributed equally to this work.

## Table of Contents

|                                                                                                                                                                                                                                                                                                                                                                     | Page |
|---------------------------------------------------------------------------------------------------------------------------------------------------------------------------------------------------------------------------------------------------------------------------------------------------------------------------------------------------------------------|------|
| <b><u>Synthesis</u></b>                                                                                                                                                                                                                                                                                                                                             |      |
| <i>Scheme S1.</i> Synthetic route for the carbazolylgold(III) complexes.                                                                                                                                                                                                                                                                                            | 5    |
| <b><u>Thermogravimetric Analyses</u></b>                                                                                                                                                                                                                                                                                                                            |      |
| <i>Figure S1.</i> Thermogravimetric analysis (TGA) curves of <b>1–6</b> .                                                                                                                                                                                                                                                                                           | 6    |
| <i>Table S1.</i> Thermal properties of <b>1–6</b> .                                                                                                                                                                                                                                                                                                                 | 6    |
| <b><u>Electrochemistry</u></b>                                                                                                                                                                                                                                                                                                                                      |      |
| <i>Table S2.</i> Electrochemical data of <b>1–6</b> .                                                                                                                                                                                                                                                                                                               | 7    |
| <b><u>Photophysical Properties</u></b>                                                                                                                                                                                                                                                                                                                              |      |
| <i>Table S3.</i> Electronic absorption data of <b>1–6</b> .                                                                                                                                                                                                                                                                                                         | 8    |
| <i>Figure S2.</i> Transient absorption difference spectra of <b>1</b> in degassed toluene at 298 K.                                                                                                                                                                                                                                                                 | 8    |
| <i>Figure S3.</i> Transient absorption difference spectra of <b>4</b> in degassed toluene at 298 K.                                                                                                                                                                                                                                                                 | 9    |
| <i>Figure S4.</i> Normalized PL spectra of <b>1–6</b> doped at 10 wt% and <b>1</b> doped at 5–20 wt% in MCP thin films at 298 K.                                                                                                                                                                                                                                    | 9    |
| <i>Figure S5.</i> Normalized PL spectra of <b>2</b> doped at 5–20 wt% in MCP thin films at 298 K.                                                                                                                                                                                                                                                                   | 10   |
| <i>Figure S6.</i> Normalized PL spectra of <b>3</b> doped at 5–20 wt% in MCP thin films at 298 K.                                                                                                                                                                                                                                                                   | 10   |
| <i>Figure S7.</i> Normalized PL spectra of <b>4</b> doped at 5–20 wt% in MCP thin films at 298 K.                                                                                                                                                                                                                                                                   | 11   |
| <i>Figure S8.</i> Normalized PL spectra of <b>5</b> doped at 5–20 wt% in MCP thin films at 298 K.                                                                                                                                                                                                                                                                   | 11   |
| <i>Figure S9.</i> Normalized PL spectra of <b>6</b> doped at 5–20 wt% in MCP thin films at 298 K.                                                                                                                                                                                                                                                                   | 12   |
| <i>Figure S10.</i> Emission spectra of the thin film of 20 wt% <b>1</b> doped in MCP upon increasing the temperature from 320 to 370 K.                                                                                                                                                                                                                             | 12   |
| <i>Figure S11.</i> Normalized emission spectra of <b>1</b> and <b>4</b> doped in different host materials at 10 wt% at 298 K.                                                                                                                                                                                                                                       | 13   |
| <i>Figure S12.</i> Normalized emission spectra of $[\text{Au}\{4\text{-}^t\text{BuC}^{\wedge}\text{C}(4\text{-}^t\text{BuC}_6\text{H}_4)^{\wedge}\text{N}_{(1\text{-thpy})}\}\text{Cl}]$ and $[\text{Au}\{4\text{-}^t\text{BuC}^{\wedge}\text{C}(4\text{-}^t\text{BuC}_6\text{H}_4)^{\wedge}\text{N}_{(2\text{-thpy})}\}\text{Cl}]$ doped at 5 wt% in MCP at 298 K. | 14   |
| <b><u>Computational Studies</u></b>                                                                                                                                                                                                                                                                                                                                 |      |
| <i>Figure S13.</i> The optimized ground-state geometries (front view) with selected structural parameters of <b>1, 3, 4</b> and <b>6</b> .                                                                                                                                                                                                                          | 15   |
| <i>Figure S14.</i> The optimized ground-state geometries (side view) of <b>1, 3, 4</b> and <b>6</b> .                                                                                                                                                                                                                                                               | 16   |
| <i>Table S4.</i> The first fifteen singlet excited states ( $S_n$ ) of <b>1, 3, 4</b> and <b>6</b> computed by TDDFT/CPCM using toluene as the solvent.                                                                                                                                                                                                             | 17   |
| <i>Figure S15.</i> Simulated UV-vis spectrum of <b>1</b> computed by TDDFT/CPCM using toluene as the solvent.                                                                                                                                                                                                                                                       | 19   |
| <i>Figure S16.</i> Simulated UV-vis spectrum of <b>3</b> computed by TDDFT/CPCM using toluene as the solvent.                                                                                                                                                                                                                                                       | 19   |
| <i>Figure S17.</i> Simulated UV-vis spectrum of <b>4</b> computed by TDDFT/CPCM using toluene as the solvent.                                                                                                                                                                                                                                                       | 20   |
| <i>Figure S18.</i> Simulated UV-vis spectrum of <b>6</b> computed by TDDFT/CPCM using toluene as the solvent.                                                                                                                                                                                                                                                       | 20   |
| <i>Figure S19.</i> Spatial plots (isovalue = 0.03) of selected molecular orbitals of <b>1</b> at the                                                                                                                                                                                                                                                                | 21   |

|                    |                                                                                                                                                                       |    |
|--------------------|-----------------------------------------------------------------------------------------------------------------------------------------------------------------------|----|
|                    | optimized ground-state geometry.                                                                                                                                      |    |
| <b>Figure S20.</b> | Spatial plots (isovalue = 0.03) of selected molecular orbitals of <b>3</b> at the optimized ground-state geometry.                                                    | 21 |
| <b>Figure S21.</b> | Spatial plots (isovalue = 0.03) of selected molecular orbitals of <b>4</b> at the optimized ground-state geometry.                                                    | 22 |
| <b>Figure S22.</b> | Spatial plots (isovalue = 0.03) of selected molecular orbitals of <b>6</b> at the optimized ground-state geometry.                                                    | 22 |
| <b>Figure S23.</b> | Orbital energy diagram of <b>1, 3, 4</b> and <b>6</b> .                                                                                                               | 23 |
| <b>Figure S24.</b> | The distances between the sulfur and hydrogen atoms in the <i>N</i> -heterocyclic moieties of <b>1, 3, 4</b> and <b>6</b> at the optimized T <sub>1</sub> geometries. | 23 |
| <b>Figure S25.</b> | Plots of spin density (isovalue = 0.002) of the T <sub>1</sub> of <b>1, 3, 4</b> and <b>6</b> .                                                                       | 24 |
| <b>Table S5.</b>   | Relative energies of the optimized T <sub>1</sub> states of <b>1, 3, 4</b> and <b>6</b> .                                                                             | 25 |
| <b>Table S6.</b>   | Cartesian coordinates of the optimized ground-state geometry of <b>1</b> .                                                                                            | 26 |
| <b>Table S7.</b>   | Cartesian coordinates of the optimized ground-state geometry of <b>3</b> .                                                                                            | 27 |
| <b>Table S8.</b>   | Cartesian coordinates of the optimized ground-state geometry of <b>4</b> .                                                                                            | 28 |
| <b>Table S9.</b>   | Cartesian coordinates of the optimized ground-state geometry of <b>6</b> .                                                                                            | 29 |
| <b>Table S10.</b>  | Cartesian coordinates of the optimized T <sub>1</sub> geometry of <b>1</b> computed by DFT/CPCM.                                                                      | 30 |
| <b>Table S11.</b>  | Cartesian coordinates of the optimized T <sub>1</sub> geometry of <b>3</b> computed by DFT/CPCM.                                                                      | 31 |
| <b>Table S12.</b>  | Cartesian coordinates of the optimized T <sub>1</sub> geometry of <b>4</b> computed by DFT/CPCM.                                                                      | 32 |
| <b>Table S13.</b>  | Cartesian coordinates of the optimized T <sub>1</sub> geometry of <b>6</b> computed by DFT/CPCM.                                                                      | 33 |
| <b>Table S14.</b>  | Cartesian coordinates of the optimized S <sub>1</sub> geometry of <b>1</b> computed by TDDFT/CPCM.                                                                    | 34 |
| <b>Table S15.</b>  | Cartesian coordinates of the optimized T <sub>1</sub> geometry of <b>1</b> computed by TDDFT/CPCM.                                                                    | 35 |

### **OLED Fabrication and Characterization**

|                                                  |                                                                                                                                                                                                    |    |
|--------------------------------------------------|----------------------------------------------------------------------------------------------------------------------------------------------------------------------------------------------------|----|
| <b>Figure S26.</b>                               | Normalized EL spectra of the solution-processed devices based on <b>1–6</b> .                                                                                                                      | 36 |
| <b>Table S16.</b>                                | Key parameters of solution-processed OLEDs based on <b>1–6</b> .                                                                                                                                   | 37 |
| <b>Figure S27.</b>                               | EL spectra of vacuum-deposited devices based on <b>6</b> .                                                                                                                                         | 38 |
| <b>Table S17.</b>                                | Key parameters of vacuum-deposited OLEDs based on <b>1–5</b> .                                                                                                                                     | 39 |
| <b>Figure S28.</b>                               | Resonance structures of thieno[2,3- <i>c</i> ]pyridine (1-thpy) and thieno[3,2- <i>c</i> ]pyridine (2-thpy) moieties in the cyclometalating ligands.                                               | 40 |
| <b>Figure S29.</b>                               | Relative luminance, L/L <sub>0</sub> , and driving voltage of the solution-processed device based on <b>1</b> as a function of time projected at an initial luminance of 100 cd cm <sup>-2</sup> . | 40 |
| <b>Table S18.</b>                                | Lifetime data of devices based on <b>1–5</b> .                                                                                                                                                     | 41 |
| <b>Materials and reagents</b>                    |                                                                                                                                                                                                    | 42 |
| <b>Physical measurements and instrumentation</b> |                                                                                                                                                                                                    | 42 |
| <b>Synthesis</b>                                 |                                                                                                                                                                                                    | 43 |
| <b>Molecular orientation measurements</b>        |                                                                                                                                                                                                    | 49 |
| <b>Computational details</b>                     |                                                                                                                                                                                                    | 50 |

|                                                                          |    |
|--------------------------------------------------------------------------|----|
| <b>OLED fabrication and measurements</b>                                 | 51 |
| <b>NMR spectra</b>                                                       | 52 |
| <b>CSI-mass spectra and the corresponding simulated isotope patterns</b> | 61 |
| <b>References</b>                                                        | 63 |

## Synthesis

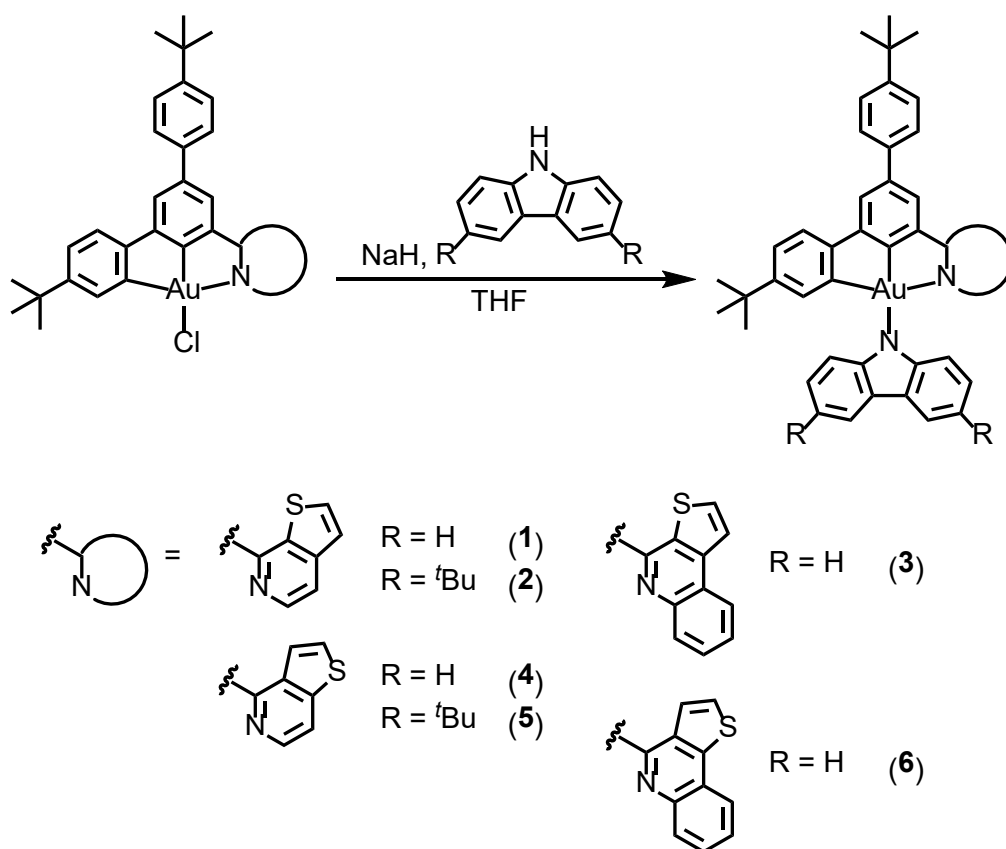

**Scheme S1.** Synthetic route for the carbazolygold(III) complexes.

## Thermogravimetric Analyses

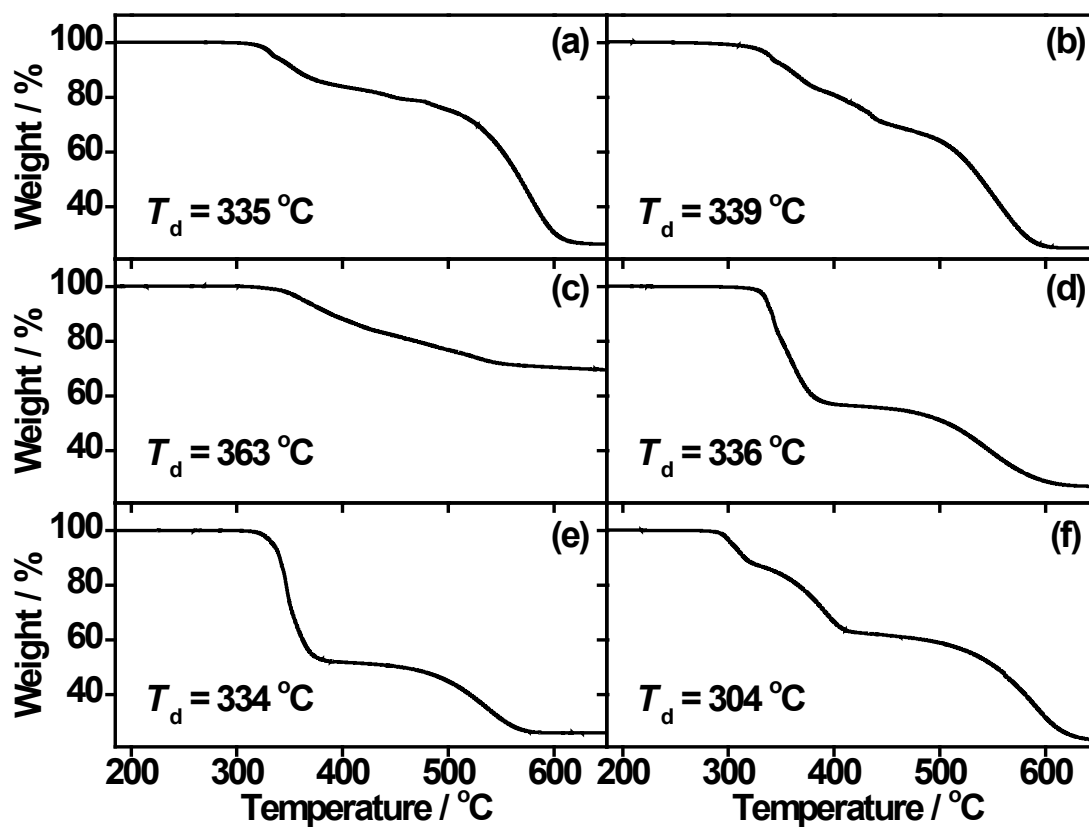

**Figure S1.** Thermogravimetric analysis (TGA) curves of (a) **1**, (b) **2**, (c) **3**, (d) **4**, (e) **5** and (f) **6**.

**Table S1.** Thermal properties of **1–6**.

| Complex  | $T_d^a$ / °C |
|----------|--------------|
| <b>1</b> | 335          |
| <b>2</b> | 339          |
| <b>3</b> | 363          |
| <b>4</b> | 336          |
| <b>5</b> | 334          |
| <b>6</b> | 304          |

<sup>a</sup>  $T_d$  is defined as the decomposition temperature at which there is 5 wt% loss of the material.

## Electrochemistry

**Table S2.** Electrochemical data of **1–6**.<sup>a</sup>

| Complex  | Oxidation                                                              | Reduction                                 | $E_{\text{HOMO}}^e$<br>/ eV | $E_{\text{LUMO}}^f$<br>/ eV |
|----------|------------------------------------------------------------------------|-------------------------------------------|-----------------------------|-----------------------------|
|          | $E_{1/2}^{\text{ox}} / \text{V vs. SCE}^b$                             | $E_{1/2}^{\text{red}} / \text{V vs. SCE}$ |                             |                             |
|          | $(\Delta E_p / \text{mV})^c$<br>$[E_{\text{pa}} / \text{V vs. SCE}]^d$ | $(\Delta E_p / \text{mV})$                |                             |                             |
| <b>1</b> | [+0.81], [+1.30]                                                       | −1.46 (73)                                | −5.15                       | −2.88                       |
| <b>2</b> | +0.67 (84)                                                             | −1.45 (85)                                | −5.01                       | −2.89                       |
| <b>3</b> | [+0.82], [+1.31]                                                       | −1.27 (57)                                | −5.16                       | −3.07                       |
| <b>4</b> | [+0.80], [+1.29]                                                       | −1.52 (87)                                | −5.14                       | −2.82                       |
| <b>5</b> | +0.66 (68)                                                             | −1.52 (82)                                | −5.00                       | −2.82                       |
| <b>6</b> | [+0.80], [+1.30]                                                       | −1.31 (86)                                | −5.14                       | −3.03                       |

<sup>a</sup> In CH<sub>2</sub>Cl<sub>2</sub> solution with 0.1 M <sup>n</sup>Bu<sub>4</sub>NPF<sub>6</sub> as supporting electrolyte at 298 K; working electrode, glassy carbon; scan rate=100 mV s<sup>−1</sup>.

<sup>b</sup>  $E_{1/2} = (E_{\text{pa}} + E_{\text{pc}})/2$ ;  $E_{\text{pa}}$  and  $E_{\text{pc}}$  are the peak anodic and peak cathodic potentials, respectively.

<sup>c</sup>  $\Delta E_p = (E_{\text{pa}} - E_{\text{pc}})$ .

<sup>d</sup>  $E_{\text{pa}}$  refers to the anodic peak potential for the irreversible oxidation waves.

<sup>e</sup>  $E_{\text{HOMO}}$  levels are calculated from the electrode potentials, i.e.  $E_{\text{HOMO}} = -[E_{\text{pa}} (\text{vs. Fc}^+/\text{Fc}) + 4.80]$  eV or  $E_{\text{HOMO}} = -[E_{1/2}^{\text{ox}} (\text{vs. Fc}^+/\text{Fc}) + 4.80]$  eV.  $E^\circ(\text{Fc}^+/\text{Fc}) = +0.46$  V vs. SCE in CH<sub>2</sub>Cl<sub>2</sub> (0.1 M <sup>n</sup>Bu<sub>4</sub>NPF<sub>6</sub>). From ref. 1.

<sup>f</sup>  $E_{\text{LUMO}}$  levels are calculated from the electrode potentials, i.e.  $E_{\text{LUMO}} = -[E_{1/2}^{\text{red}} (\text{vs. Fc}^+/\text{Fc}) + 4.80]$  eV.  $E^\circ(\text{Fc}^+/\text{Fc}) = +0.46$  V vs. SCE in CH<sub>2</sub>Cl<sub>2</sub> (0.1 M <sup>n</sup>Bu<sub>4</sub>NPF<sub>6</sub>). From ref. 1.

## Photophysical Properties

**Table S3.** Electronic absorption data of **1–6**.

| Complex  | Absorption $\lambda_{max}$ / nm ( $\epsilon$ / mol <sup>-1</sup> dm <sup>3</sup> cm <sup>-1</sup> ) |
|----------|-----------------------------------------------------------------------------------------------------|
| <b>1</b> | 305 (24515), 337 (11270), 351 (13584), 365 (14190), 410 (2590)                                      |
| <b>2</b> | 308 (26940), 339 (10950), 356 (12580), 370 (12140), 410 (2450)                                      |
| <b>3</b> | 304 (26180), 331 (16920), 366 (19755), 388 (16420), 427 (2028)                                      |
| <b>4</b> | 305 (43670), 340 (20580), 366 (24180), 376 (20230), 409 (5160)                                      |
| <b>5</b> | 307 (38920), 341 (21320), 352 (20880), 366 (19170), 408 (4320)                                      |
| <b>6</b> | 304 (43770), 340 (20980), 365 (24445), 393 (19640), 430 (4340)                                      |

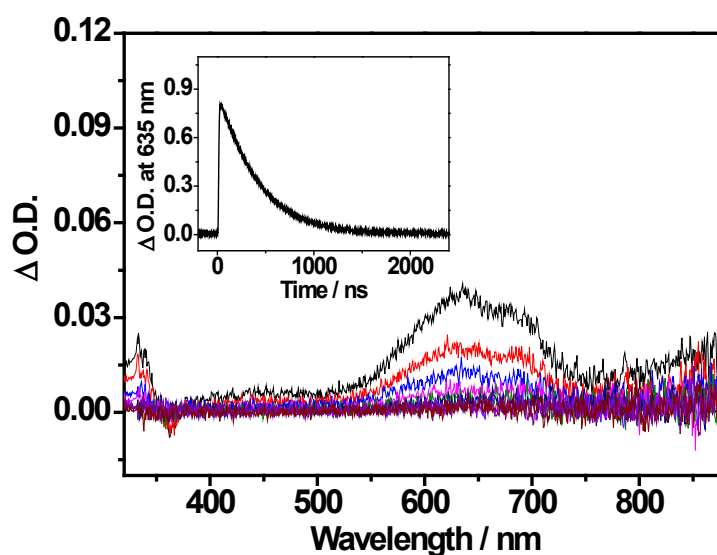

**Figure S2.** Transient absorption difference spectra of **1** in degassed toluene at 298 K at decay times of 0–1.6  $\mu$ s with time intervals of 200 ns. Inset: The decay trace of the absorptions monitored at 635 nm.



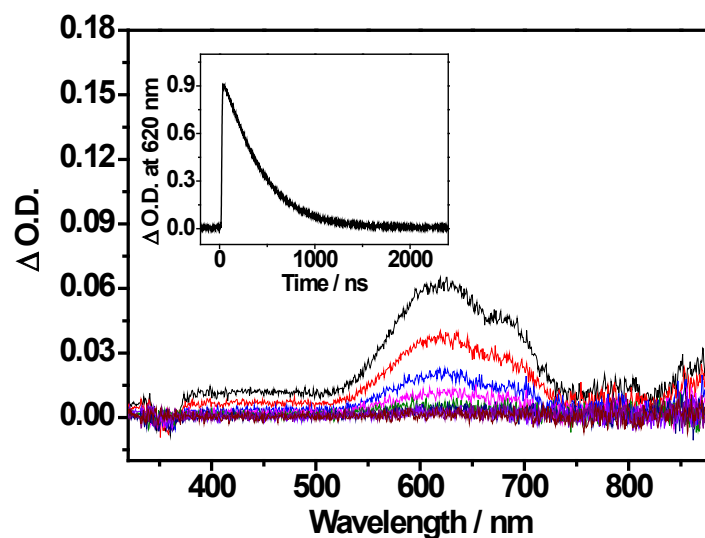

**Figure S3.** Transient absorption difference spectra of **4** in degassed toluene at 298 K at decay times of 0–1.6  $\mu s$  with time intervals of 200 ns. Inset: The decay trace of the absorptions monitored at 620 nm.

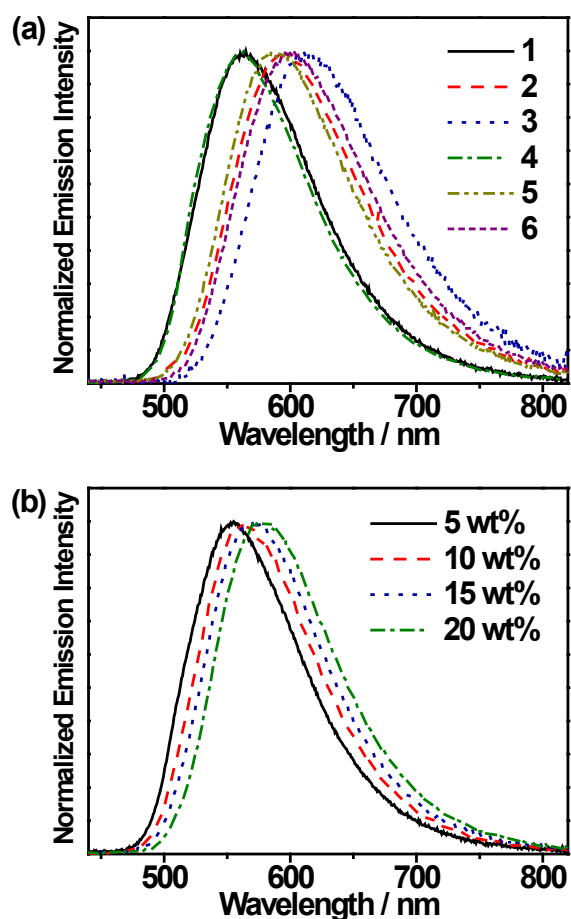

**Figure S4.** (a) Normalized PL spectra of **1-6** doped at 10 wt% in MCP thin films at 298 K. (b) Normalized PL spectra of **1** doped at 5–20 wt% in MCP thin films at 298 K.

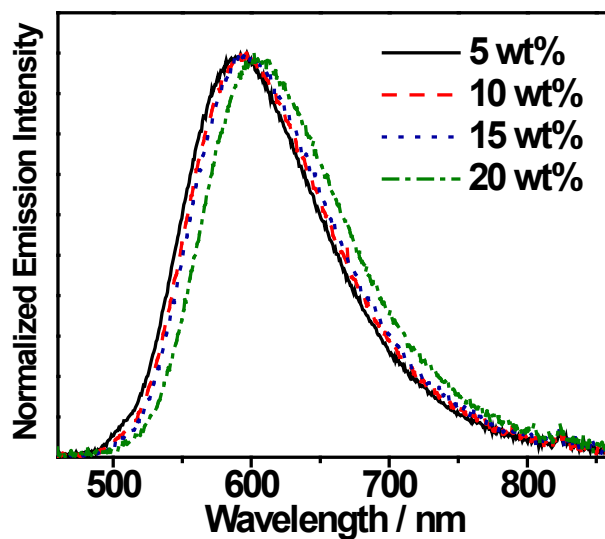

**Figure S5.** Normalized PL spectra of **2** doped at 5–20 wt% in MCP thin films at 298 K.

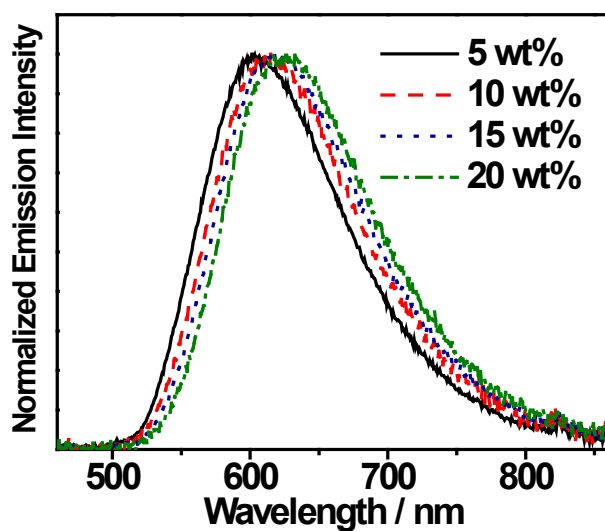

**Figure S6.** Normalized PL spectra of **3** doped at 5–20 wt% in MCP thin films at 298 K.

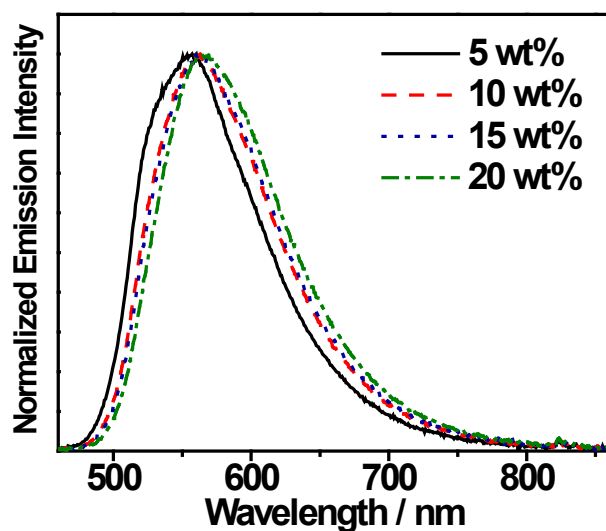

**Figure S7.** Normalized PL spectra of **4** doped at 5–20 wt% in MCP thin films at 298 K.

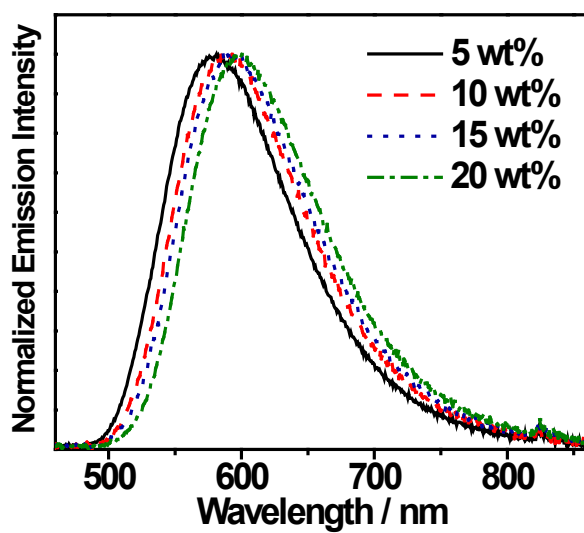

**Figure S8.** Normalized PL spectra of **5** doped at 5–20 wt% in MCP thin films at 298 K.

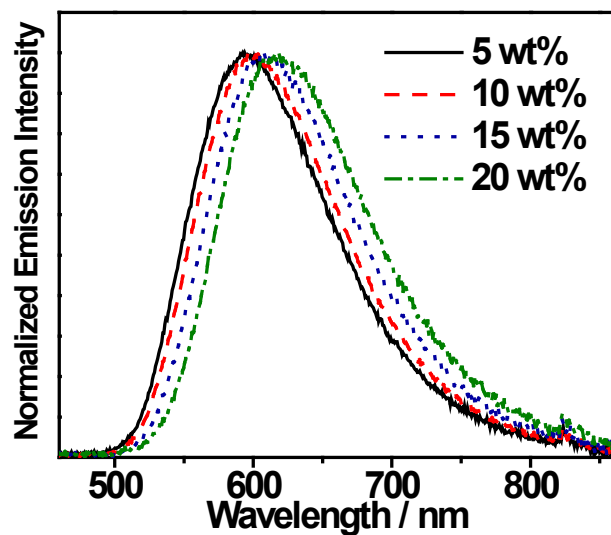

**Figure S9.** Normalized PL spectra of **6** doped at 5–20 wt% in MCP thin films at 298 K.

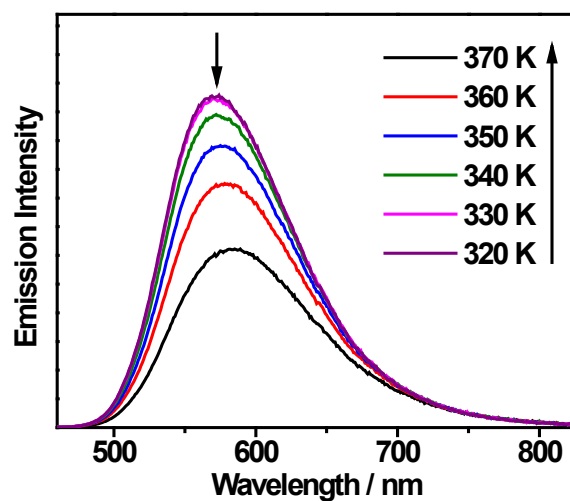

**Figure S10.** Emission spectra of the thin film of 20 wt% **1** doped in MCP upon increasing the temperature from 320 to 370 K.

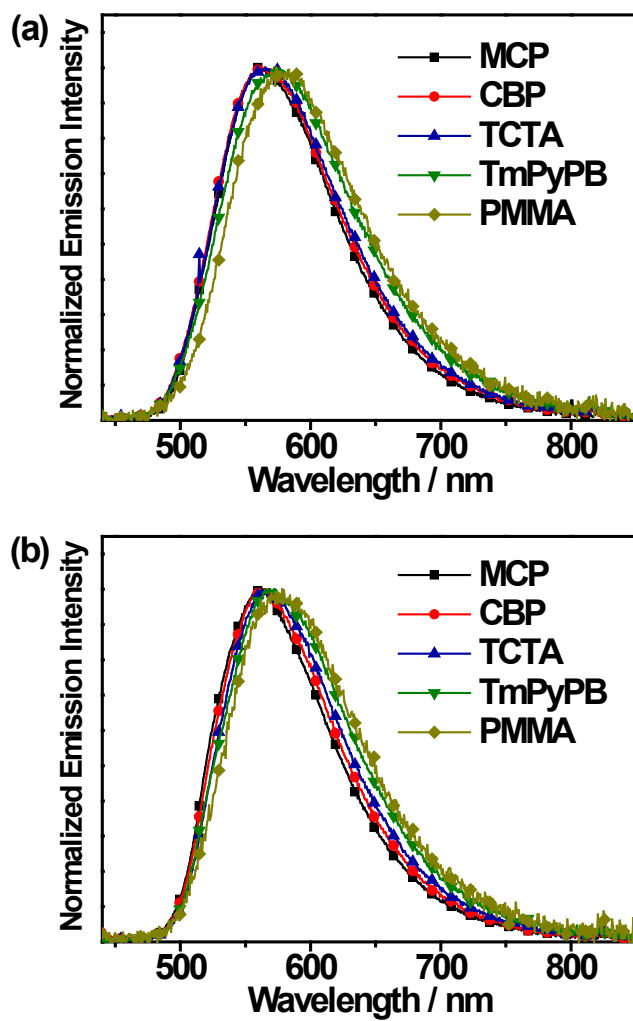

*Figure S11.* Normalized emission spectra of (a) **1** and (b) **4** doped in different host materials at 10 wt% at 298 K.

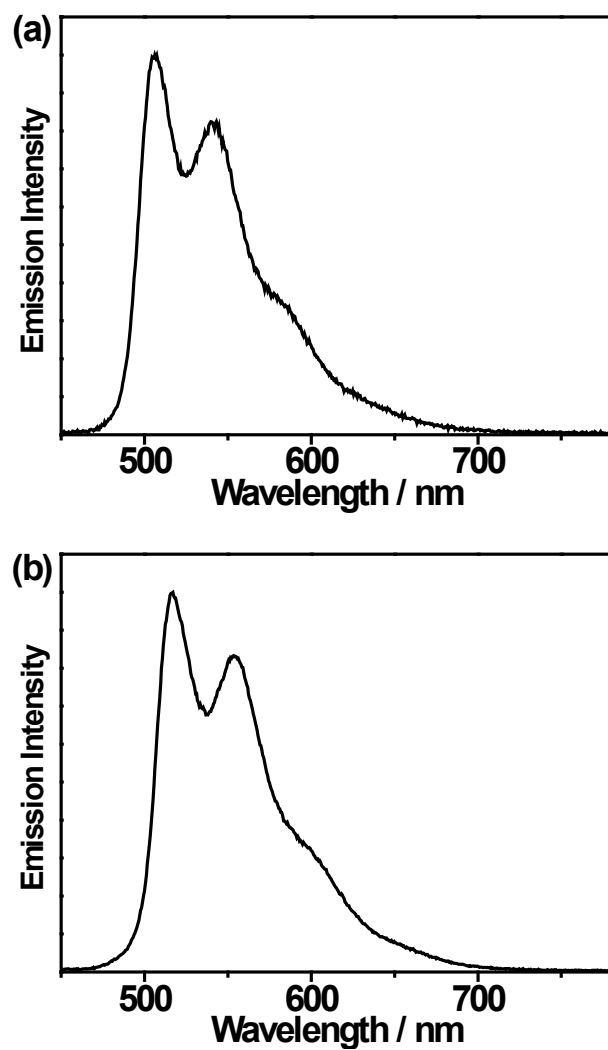

**Figure S12.** Emission spectra of  $[\text{Au}\{4\text{-}^t\text{BuC}^{\wedge}\text{C}(4\text{-}^t\text{BuC}_6\text{H}_4)^{\wedge}\text{N}_{(1\text{-thpy})}\}\text{Cl}]$  and  $[\text{Au}\{4\text{-}^t\text{BuC}^{\wedge}\text{C}(4\text{-}^t\text{BuC}_6\text{H}_4)^{\wedge}\text{N}_{(2\text{-thpy})}\}\text{Cl}]$  doped at 5 wt% in MCP at 298 K.

## Computational Studies

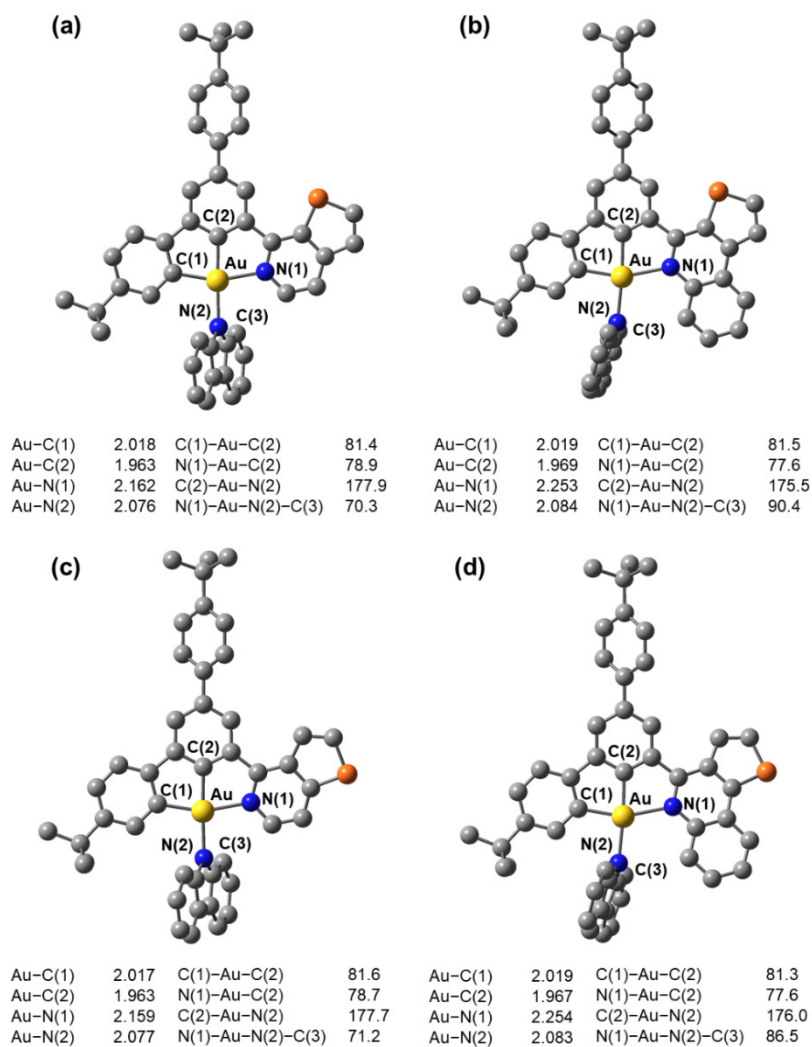

**Figure S13.** The optimized ground-state geometries (front view) with selected structural parameters of (a) **1**, (b) **3**, (c) **4** and (d) **6** at the PBE0 level of theory. The bond lengths and angles are in Angstroms and degrees, respectively. All hydrogen atoms are omitted for clarity.

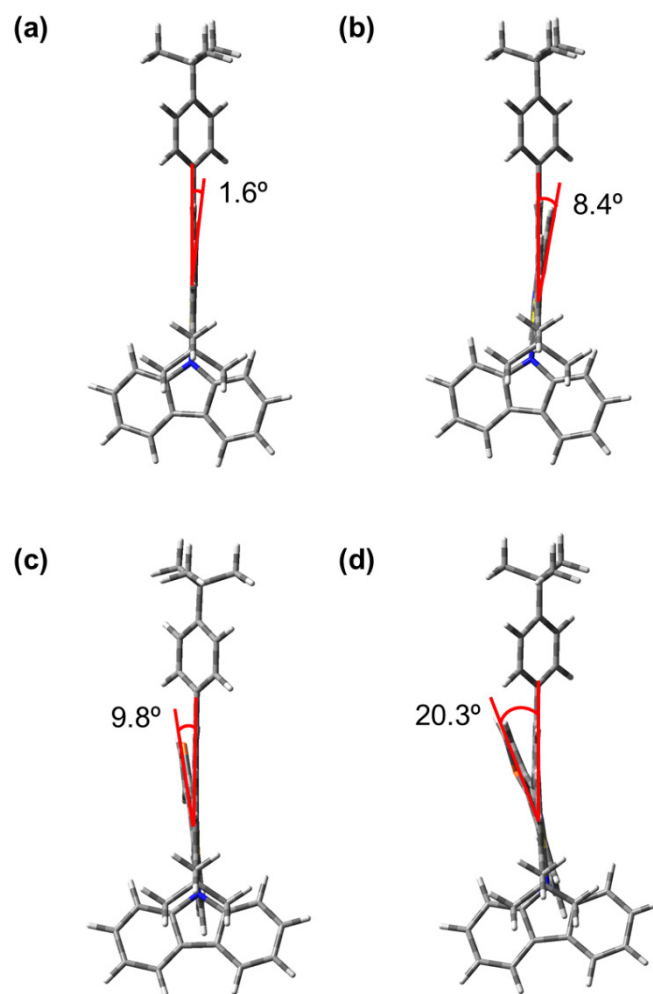

**Figure S14.** The optimized ground-state geometries (side view) of (a) **1**, (b) **3**, (c) **4** and (d) **6** at the PBE0 level of theory. The angle in red indicates the dihedral angle between the plane of the N-heterocycle and that of the central phenyl ring.



**Table S4.** The first fifteen singlet excited states ( $S_n$ ) of **1**, **3**, **4** and **6** computed by TDDFT/CPCM using toluene as the solvent.

| Complex       | $S_n$           | Excitation <sup>a</sup><br>(Coefficient) <sup>b</sup> | Vertical excitation<br>wavelength / nm | $f^c$   | Character <sup>d</sup> |
|---------------|-----------------|-------------------------------------------------------|----------------------------------------|---------|------------------------|
| <b>1</b>      | $S_1$           | H→L (0.71)                                            | 565                                    | 0.005   | LLCT                   |
|               | $S_2$           | H-1→L (0.71)                                          | 440                                    | 0.000   | LLCT                   |
|               | $S_3$           | H-2→L (0.70)                                          | 400                                    | 0.067   | ILCT/IL                |
|               | $S_4$           | H→L+1 (0.70)                                          | 396                                    | 0.004   | LLCT                   |
|               | $S_5$           | H→L+2 (0.70)                                          | 364                                    | 0.010   | LLCT                   |
|               | $S_6$           | H→L+3 (0.67)                                          | 354                                    | 0.044   | LLCT                   |
|               | $S_7$           | H-3→L (0.66)                                          | 349                                    | 0.096   | IL/ILCT                |
|               | $S_8$           | H-1→L+1 (0.70)                                        | 330                                    | 0.000   | LLCT                   |
|               | $S_9$           | H→L+5 (0.58)                                          | 320                                    | 0.068   | IL                     |
|               |                 | H→L+4 (-0.36)                                         |                                        |         | LLCT                   |
|               | $S_{10}$        | H-4→L (0.51)                                          | 317                                    | 0.018   | LLCT                   |
|               |                 | H-2→L+1 (0.41)                                        |                                        |         | IL/ILCT                |
|               | $S_{11}$        | H-4→L (0.48)                                          | 315                                    | 0.080   | LLCT                   |
|               |                 | H-2→L+1 (-0.44)                                       |                                        |         | IL/ILCT                |
|               | $S_{12}$        | H-6→L (0.51)                                          | 308                                    | 0.090   | IL/ILCT                |
| H-5→L (0.31)  |                 |                                                       |                                        | ILCT/IL |                        |
| $S_{13}$      | H-1→L+2 (0.66)  | 308                                                   | 0.009                                  | LLCT    |                        |
| $S_{14}$      | H→L+4 (0.58)    | 303                                                   | 0.008                                  | LLCT    |                        |
|               | H→L+5 (0.34)    |                                                       |                                        | IL      |                        |
| $S_{15}$      | H-5→L (0.52)    | 302                                                   | 0.168                                  | ILCT/IL |                        |
|               | H-6→L (-0.41)   |                                                       |                                        | IL/ILCT |                        |
| <b>3</b>      | $S_1$           | H→L (0.71)                                            | 596                                    | 0.000   | LLCT                   |
|               | $S_2$           | H-1→L (0.71)                                          | 459                                    | 0.001   | LLCT                   |
|               | $S_3$           | H-2→L (0.70)                                          | 421                                    | 0.046   | ILCT/IL                |
|               | $S_4$           | H→L+1 (0.69)                                          | 388                                    | 0.001   | LLCT                   |
|               | $S_5$           | H→L+3 (0.66)                                          | 371                                    | 0.090   | LLCT                   |
|               | $S_6$           | H-3→L (0.67)                                          | 367                                    | 0.159   | IL/ILCT                |
|               | $S_7$           | H→L+2 (0.68)                                          | 361                                    | 0.002   | LLCT                   |
|               | $S_8$           | H-5→L (0.44)                                          | 338                                    | 0.098   | IL/ILCT                |
|               |                 | H-6→L (-0.43)                                         |                                        |         | IL/ILCT                |
|               | $S_9$           | H-4→L (0.62)                                          | 329                                    | 0.010   | LLCT                   |
|               | $S_{10}$        | H-6→L (0.50)                                          | 327                                    | 0.175   | IL/ILCT                |
|               |                 | H-5→L (0.42)                                          |                                        |         | IL/ILCT                |
|               | $S_{11}$        | H-1→L+1 (0.70)                                        | 325                                    | 0.001   | LLCT                   |
|               | $S_{12}$        | H→L+6 (0.62)                                          | 318                                    | 0.055   | IL                     |
|               | $S_{13}$        | H-2→L+1 (0.54)                                        | 313                                    | 0.069   | IL                     |
| H-7→L (-0.37) |                 |                                                       |                                        | ILCT/IL |                        |
| $S_{14}$      | H-1→L+2 (0.55)  | 308                                                   | 0.001                                  | LLCT    |                        |
|               | H-1→L+3 (-0.43) |                                                       |                                        | LLCT    |                        |
| $S_{15}$      | H-7→L (0.54)    | 308                                                   | 0.119                                  | ILCT/IL |                        |
|               | H-2→L+1 (0.34)  |                                                       |                                        | IL      |                        |
| <b>4</b>      | $S_1$           | H→L (0.70)                                            | 540                                    | 0.010   | LLCT                   |
|               | $S_2$           | H-1→L (0.71)                                          | 424                                    | 0.000   | LLCT                   |

|          |                 |                 |     |       |         |
|----------|-----------------|-----------------|-----|-------|---------|
|          | S <sub>3</sub>  | H→L+1 (0.70)    | 418 | 0.002 | LLCT    |
|          | S <sub>4</sub>  | H-2→L (0.70)    | 391 | 0.097 | ILCT/IL |
|          | S <sub>5</sub>  | H→L+2 (0.70)    | 367 | 0.006 | LLCT    |
|          | S <sub>6</sub>  | H→L+3 (0.69)    | 350 | 0.035 | LLCT    |
|          | S <sub>7</sub>  | H-1→L+1 (0.70)  | 346 | 0.001 | LLCT    |
|          | S <sub>8</sub>  | H-3→L (0.67)    | 343 | 0.200 | IL/ILCT |
|          | S <sub>9</sub>  | H-2→L+1 (0.65)  | 322 | 0.073 | ILCT/IL |
|          | S <sub>10</sub> | H→L+5 (0.67)    | 319 | 0.071 | IL      |
|          | S <sub>11</sub> | H-1→L+2 (0.70)  | 310 | 0.001 | LLCT    |
|          | S <sub>12</sub> | H-4→L (0.55)    | 309 | 0.060 | LLCT    |
|          |                 | H-5→L (-0.39)   |     |       | IL/ILCT |
|          | S <sub>13</sub> | H-5→L (0.54)    | 307 | 0.025 | IL/ILCT |
|          |                 | H-4→L (0.40)    |     |       | LLCT    |
|          | S <sub>14</sub> | H→L+4 (0.67)    | 303 | 0.003 | LLCT    |
|          | S <sub>15</sub> | H-6→L (0.66)    | 298 | 0.049 | ILCT    |
| <b>6</b> | S <sub>1</sub>  | H→L (0.71)      | 571 | 0.000 | LLCT    |
|          | S <sub>2</sub>  | H-1→L (0.71)    | 443 | 0.001 | LLCT    |
|          | S <sub>3</sub>  | H-2→L (0.69)    | 407 | 0.058 | ILCT/IL |
|          | S <sub>4</sub>  | H→L+1 (0.70)    | 406 | 0.005 | LLCT    |
|          | S <sub>5</sub>  | H→L+2 (0.69)    | 386 | 0.002 | LLCT    |
|          | S <sub>6</sub>  | H→L+3 (0.69)    | 368 | 0.057 | LLCT    |
|          | S <sub>7</sub>  | H-3→L (0.67)    | 360 | 0.223 | IL/ILCT |
|          | S <sub>8</sub>  | H-1→L+1 (0.70)  | 340 | 0.000 | LLCT    |
|          | S <sub>9</sub>  | H-5→L (0.55)    | 337 | 0.018 | IL/ILCT |
|          |                 | H-4→L (0.32)    |     |       | LLCT    |
|          | S <sub>10</sub> | H-1→L+2 (0.69)  | 323 | 0.001 | LLCT    |
|          | S <sub>11</sub> | H-4→L (0.55)    | 321 | 0.007 | LLCT    |
|          | S <sub>12</sub> | H-6→L (0.34)    | 319 | 0.101 | IL/ILCT |
|          |                 | H→L+5 (-0.33)   |     |       | IL      |
|          |                 | H-2→L+1 (-0.32) |     |       | ILCT/IL |
|          | S <sub>13</sub> | H→L+5 (0.59)    | 318 | 0.051 | IL      |
|          | S <sub>14</sub> | H-6→L (0.47)    | 314 | 0.126 | IL/ILCT |
|          |                 | H-2→L+1 (0.44)  |     |       | ILCT/IL |
|          | S <sub>15</sub> | H-2→L+2 (0.49)  | 307 | 0.003 | IL      |
|          |                 | H-2→L+3 (0.31)  |     |       | IL      |

<sup>a</sup> Orbitals involved in the major excitation (H = HOMO and L = LUMO).

<sup>b</sup> The coefficients in the configuration interaction (CI) expansion that are less than 0.3 are not listed.

<sup>c</sup> Oscillator strengths.

<sup>d</sup> Character of the transition.

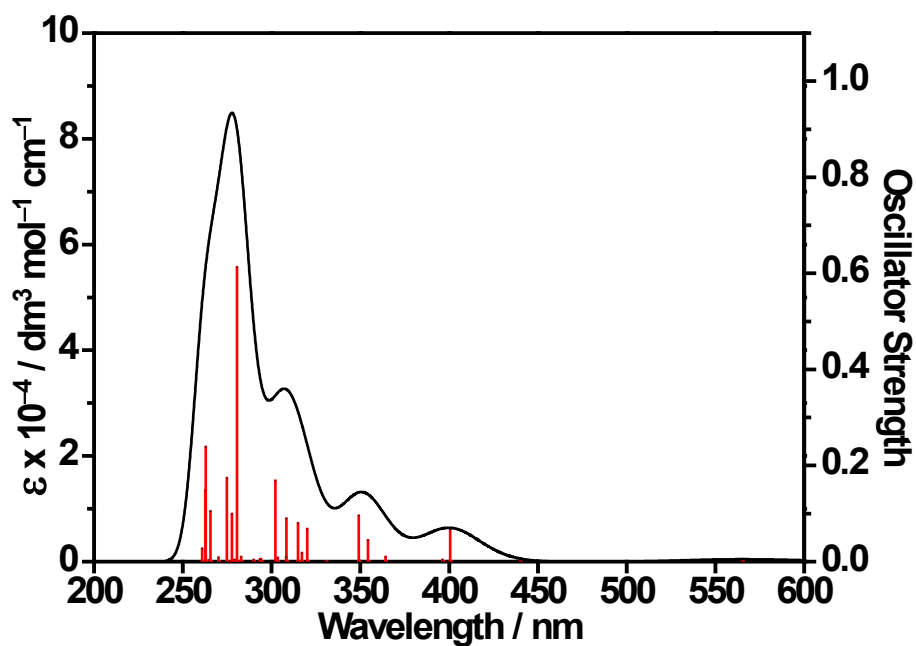

**Figure S15.** Simulated UV-vis spectrum of **1** computed by TDDFT/CPCM using toluene as the solvent.

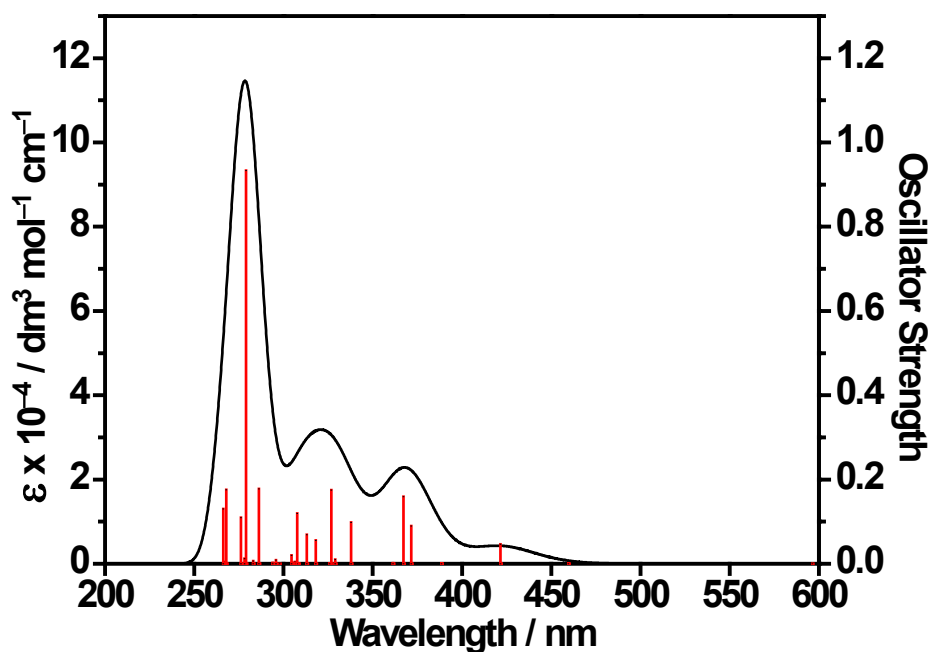

**Figure S16.** Simulated UV-vis spectrum of **3** computed by TDDFT/CPCM using toluene as the solvent.

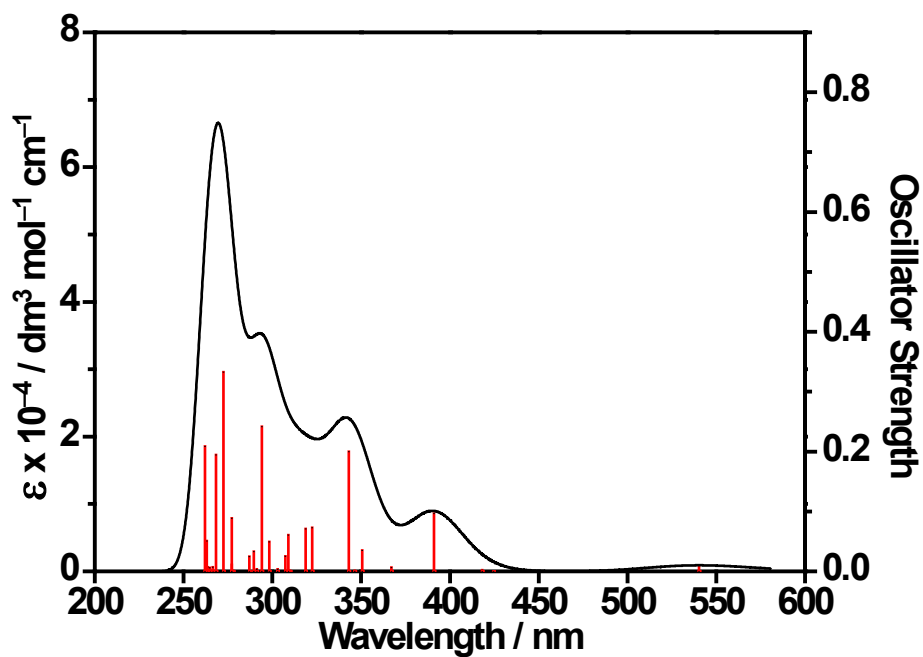

*Figure S17.* Simulated UV-vis spectrum of **4** computed by TDDFT/CPCM using toluene as the solvent.

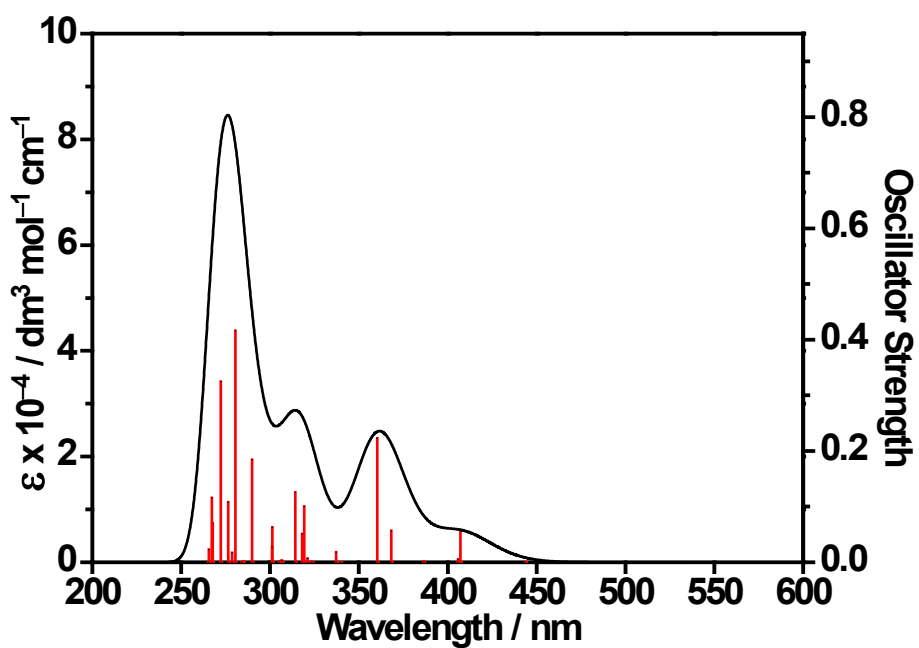

*Figure S18.* Simulated UV-vis spectrum of **6** computed by TDDFT/CPCM using toluene as the solvent.

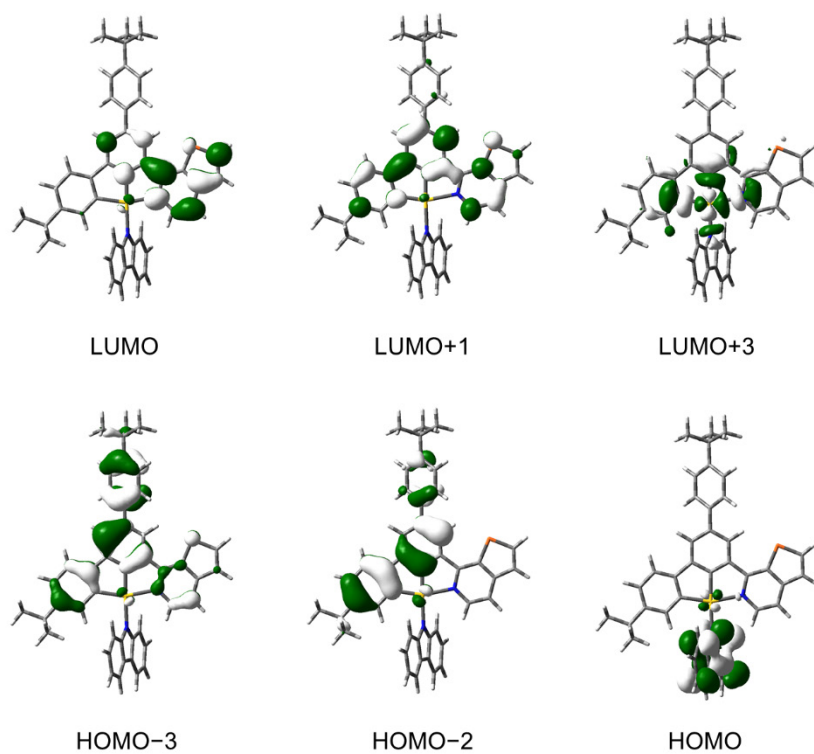

**Figure S19.** Spatial plots (isovalue = 0.03) of selected molecular orbitals of **1** at the optimized ground-state geometry.

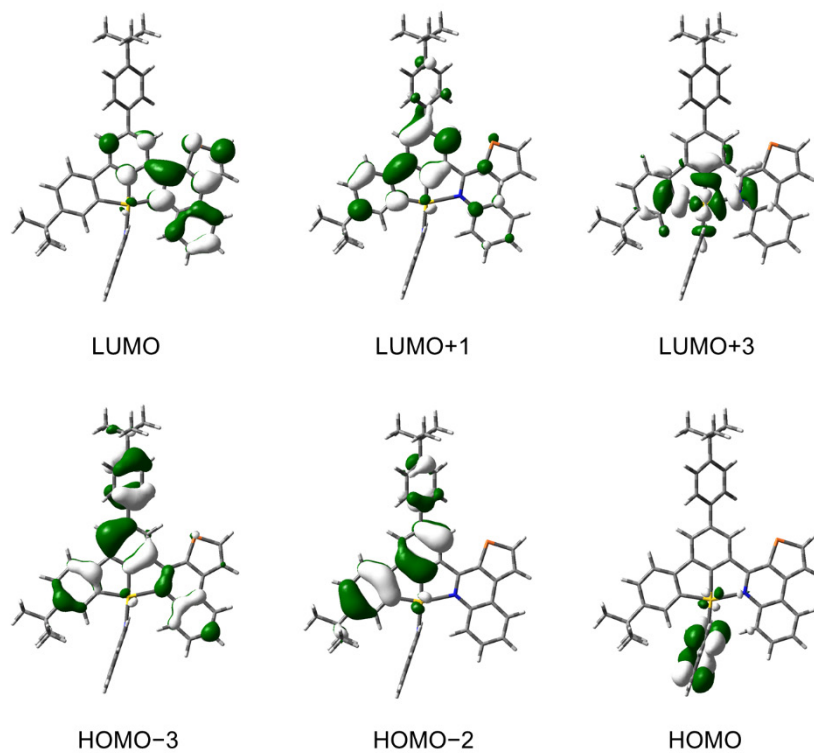

**Figure S20.** Spatial plots (isovalue = 0.03) of selected molecular orbitals of **3** at the optimized ground-state geometry.

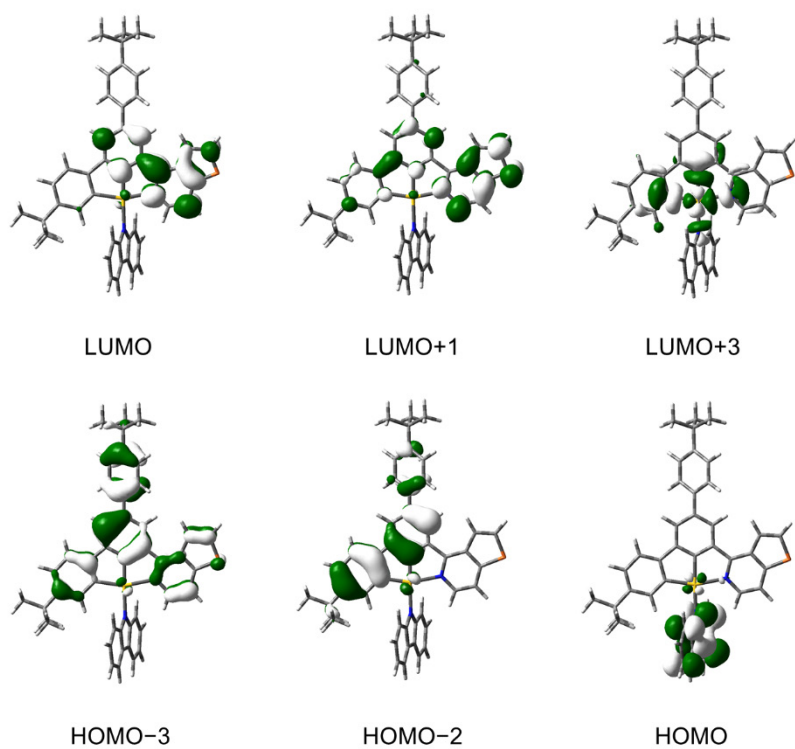

**Figure S21.** Spatial plots (isovalue = 0.03) of selected molecular orbitals of **4** at the optimized ground-state geometry.

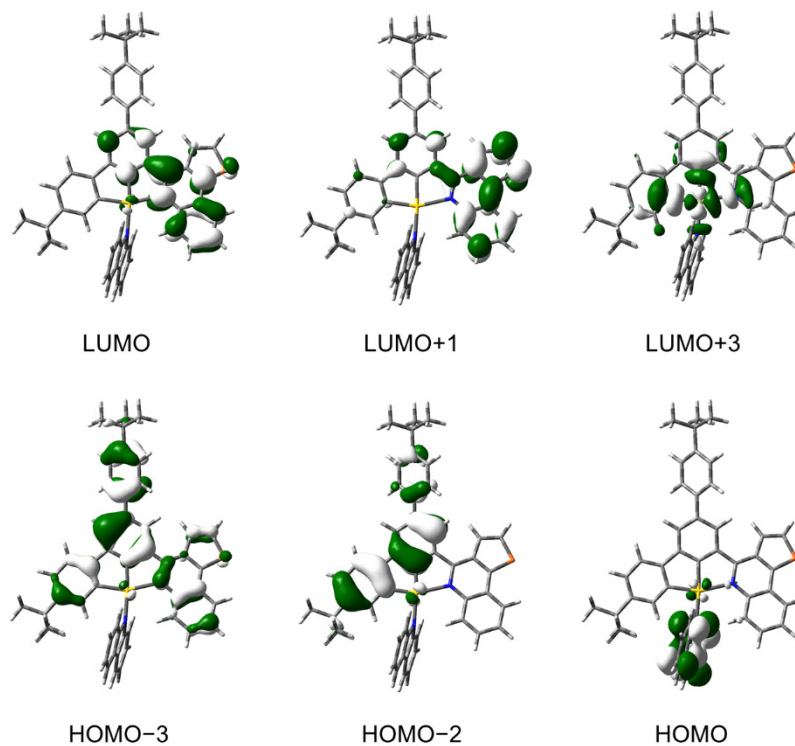

**Figure S22.** Spatial plots (isovalue = 0.03) of selected molecular orbitals of **6** at the optimized ground-state geometry.

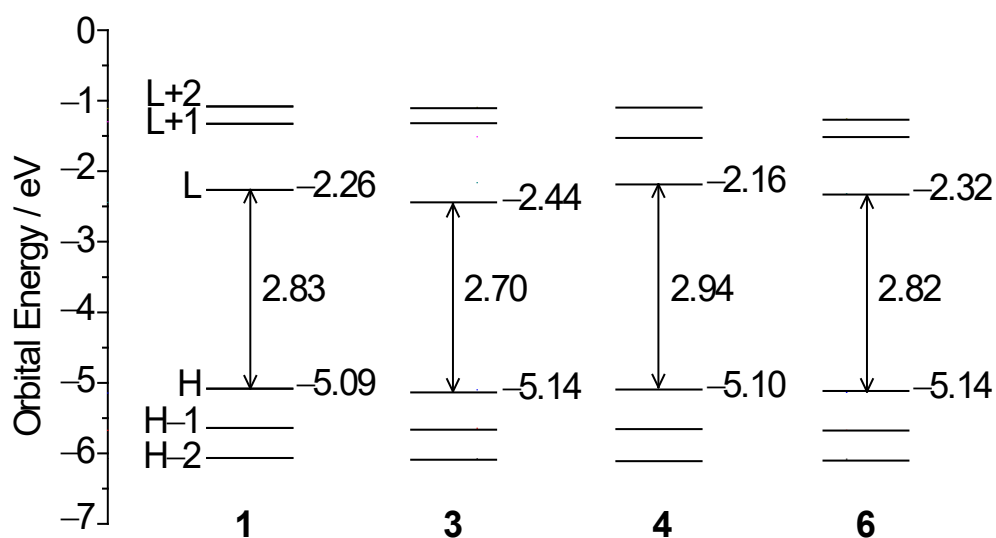

**Figure S23.** Orbital energy diagram of **1**, **3**, **4** and **6**.

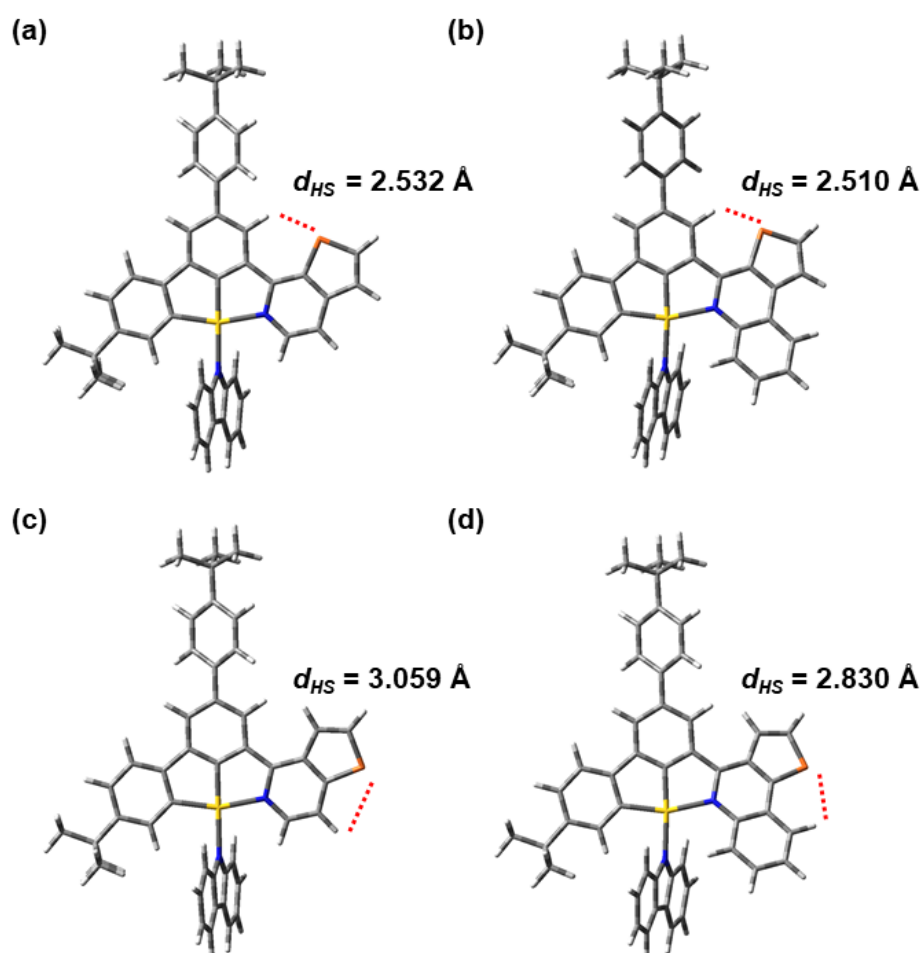

**Figure S24.** The distances between the sulfur and hydrogen atoms in the *N*-heterocyclic moieties of (a) **1**, (b) **3**, (c) **4** and (d) **6** at the optimized  $T_1$  geometries.

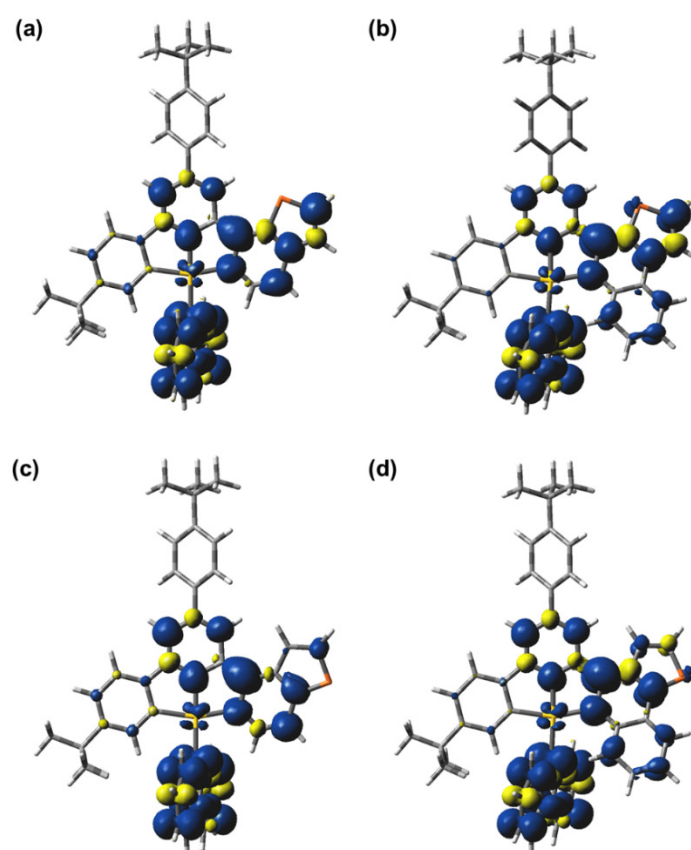

**Figure S25.** Plots of spin density (isovalue = 0.002) of the T<sub>1</sub> states of (a) **1**, (b) **3**, (c) **4** and (d) **6**.



**Table S5.** Relative energies of the optimized T<sub>1</sub> states of **1**, **3**, **4** and **6**.

| Complex  | $\Delta E(T_1-S_0) / \text{cm}^{-1} (\lambda / \text{nm})^a$ |
|----------|--------------------------------------------------------------|
| <b>1</b> | 17487 (572)                                                  |
| <b>3</b> | 15830 (632)                                                  |
| <b>4</b> | 17947 (557)                                                  |
| <b>6</b> | 16353 (612)                                                  |

<sup>a</sup> Energy difference between the T<sub>1</sub> and S<sub>0</sub> states at the corresponding optimized geometry in toluene.

**Table S6.** Cartesian coordinates of the optimized ground-state geometry of **1**.

|    |    |            |           |           |    |   |           |           |           |
|----|----|------------|-----------|-----------|----|---|-----------|-----------|-----------|
| 1  | C  | -0.639759  | 0.033819  | -0.027176 | 61 | H | 3.033058  | 0.540681  | -2.549325 |
| 2  | C  | -2.860845  | -0.852269 | -0.059898 | 62 | C | 6.647636  | -0.527716 | -1.465340 |
| 3  | C  | -3.366376  | 0.454239  | -0.000291 | 63 | C | 4.480078  | -2.159788 | 3.188811  |
| 4  | C  | -2.486009  | 1.549828  | 0.046930  | 64 | H | 2.518588  | -1.532961 | 2.542128  |
| 5  | C  | -1.106930  | 1.347363  | 0.039484  | 65 | C | 6.327011  | -1.823254 | 1.652601  |
| 6  | H  | -3.572544  | -1.670279 | -0.057402 | 66 | C | 6.420180  | 0.052502  | -2.705982 |
| 7  | H  | -2.897372  | 2.555599  | 0.069157  | 67 | H | 4.965895  | 0.887795  | -4.063132 |
| 8  | C  | -0.011356  | 2.327306  | 0.086180  | 68 | H | 7.652389  | -0.821328 | -1.170959 |
| 9  | C  | -0.133535  | 3.711032  | 0.144490  | 69 | C | 5.846672  | -2.264913 | 2.878514  |
| 10 | C  | 1.293194   | 1.764766  | 0.067771  | 70 | H | 4.125753  | -2.503485 | 4.157112  |
| 11 | C  | 1.002092   | 4.522579  | 0.179922  | 71 | H | 7.385664  | -1.900399 | 1.416535  |
| 12 | H  | -1.118133  | 4.172294  | 0.160725  | 72 | H | 7.249206  | 0.214592  | -3.388799 |
| 13 | C  | 2.410466   | 2.579107  | 0.105393  | 73 | H | 6.530601  | -2.690507 | 3.607128  |
| 14 | C  | 2.288986   | 3.982093  | 0.158649  | 74 | N | 3.344238  | -0.627620 | -0.002191 |
| 15 | H  | 0.865042   | 5.597665  | 0.222781  | 75 | C | -0.773223 | -2.374617 | -0.145059 |
| 16 | H  | 3.394481   | 2.120947  | 0.084421  | 76 | C | -1.338985 | -3.654624 | -0.237626 |
| 17 | C  | -4.829830  | 0.676933  | 0.015713  | 77 | C | -0.517415 | -4.808987 | -0.298800 |
| 18 | C  | -5.401416  | 1.681562  | 0.808359  | 78 | C | 1.375769  | -3.370740 | -0.181606 |
| 19 | C  | -5.692668  | -0.104788 | -0.757996 | 79 | C | 0.873769  | -4.650384 | -0.268345 |
| 20 | C  | -6.773703  | 1.887567  | 0.821337  | 80 | C | -1.281110 | -6.014971 | -0.392237 |
| 21 | H  | -4.764555  | 2.292628  | 1.442462  | 81 | C | -2.616132 | -5.775522 | -0.403971 |
| 22 | C  | -7.068948  | 0.105898  | -0.739593 | 82 | H | 2.441220  | -3.167150 | -0.155545 |
| 23 | H  | -5.283042  | -0.874238 | -1.407433 | 83 | H | 1.542224  | -5.502592 | -0.313440 |
| 24 | C  | -7.644917  | 1.106054  | 0.048857  | 84 | H | -0.841834 | -7.003495 | -0.448399 |
| 25 | H  | -7.173292  | 2.672427  | 1.458083  | 85 | H | -3.416935 | -6.501299 | -0.467769 |
| 26 | H  | -7.693894  | -0.522276 | -1.365417 | 86 | C | -1.477204 | -1.079979 | -0.080395 |
| 27 | Au | 1.302430   | -0.251166 | -0.020806 | 87 | S | -3.021557 | -4.097978 | -0.303095 |
| 28 | C  | -9.151322  | 1.368668  | 0.093804  | 88 | N | 0.582375  | -2.287195 | -0.120438 |
| 29 | C  | -9.933134  | 0.415796  | -0.814289 |    |   |           |           |           |
| 30 | H  | -9.796791  | -0.630314 | -0.520253 |    |   |           |           |           |
| 31 | H  | -11.002244 | 0.641479  | -0.747194 |    |   |           |           |           |
| 32 | H  | -9.638507  | 0.520061  | -1.863874 |    |   |           |           |           |
| 33 | C  | -9.657340  | 1.185847  | 1.534348  |    |   |           |           |           |
| 34 | H  | -9.164443  | 1.872649  | 2.229040  |    |   |           |           |           |
| 35 | H  | -10.735014 | 1.377889  | 1.583371  |    |   |           |           |           |
| 36 | H  | -9.476855  | 0.164668  | 1.885770  |    |   |           |           |           |
| 37 | C  | -9.430150  | 2.809775  | -0.364467 |    |   |           |           |           |
| 38 | H  | -8.929600  | 3.543538  | 0.274557  |    |   |           |           |           |
| 39 | H  | -9.085279  | 2.967178  | -1.391662 |    |   |           |           |           |
| 40 | H  | -10.505805 | 3.015968  | -0.330524 |    |   |           |           |           |
| 41 | C  | 3.555092   | 4.840472  | 0.180235  |    |   |           |           |           |
| 42 | C  | 4.357763   | 4.585895  | -1.107113 |    |   |           |           |           |
| 43 | H  | 5.279250   | 5.178901  | -1.100292 |    |   |           |           |           |
| 44 | H  | 4.637159   | 3.533302  | -1.213965 |    |   |           |           |           |
| 45 | H  | 3.776581   | 4.870504  | -1.990629 |    |   |           |           |           |
| 46 | C  | 3.239764   | 6.336313  | 0.263693  |    |   |           |           |           |
| 47 | H  | 2.658293   | 6.678944  | -0.598805 |    |   |           |           |           |
| 48 | H  | 2.685182   | 6.585257  | 1.174783  |    |   |           |           |           |
| 49 | H  | 4.174514   | 6.905954  | 0.278875  |    |   |           |           |           |
| 50 | C  | 4.411088   | 4.459344  | 1.399603  |    |   |           |           |           |
| 51 | H  | 3.862668   | 4.631459  | 2.331645  |    |   |           |           |           |
| 52 | H  | 4.712235   | 3.407928  | 1.374563  |    |   |           |           |           |
| 53 | H  | 5.322991   | 5.066346  | 1.423411  |    |   |           |           |           |
| 54 | C  | 4.256901   | -0.342138 | -0.993115 |    |   |           |           |           |
| 55 | C  | 4.049205   | -1.180277 | 1.044442  |    |   |           |           |           |
| 56 | C  | 4.033826   | 0.242398  | -2.247312 |    |   |           |           |           |
| 57 | C  | 5.569381   | -0.726814 | -0.597414 |    |   |           |           |           |
| 58 | C  | 3.572202   | -1.620560 | 2.287045  |    |   |           |           |           |
| 59 | C  | 5.433998   | -1.276055 | 0.726442  |    |   |           |           |           |
| 60 | C  | 5.122205   | 0.434097  | -3.087959 |    |   |           |           |           |

**Table S7.** Cartesian coordinates of the optimized ground-state geometry of **3**.

|    |    |            |           |           |    |   |           |           |           |
|----|----|------------|-----------|-----------|----|---|-----------|-----------|-----------|
| 1  | C  | -0.779535  | 0.148314  | 0.042296  | 61 | H | 2.603201  | -0.091496 | -2.818083 |
| 2  | C  | -3.023848  | -0.674121 | -0.014646 | 62 | C | 6.356174  | 0.390018  | -1.783847 |
| 3  | C  | -3.502127  | 0.641770  | 0.023987  | 63 | C | 4.765625  | -0.381789 | 3.307639  |
| 4  | C  | -2.595718  | 1.712878  | 0.082646  | 64 | H | 2.719539  | -0.643690 | 2.667275  |
| 5  | C  | -1.223543  | 1.473556  | 0.082682  | 65 | C | 6.427409  | 0.052813  | 1.593679  |
| 6  | H  | -3.754817  | -1.466675 | -0.118065 | 66 | C | 5.968446  | 0.472203  | -3.114795 |
| 7  | H  | -2.979445  | 2.727986  | 0.140562  | 67 | H | 4.340404  | 0.369078  | -4.525975 |
| 8  | C  | -0.120072  | 2.439875  | 0.126462  | 68 | H | 7.398250  | 0.525639  | -1.504651 |
| 9  | C  | -0.225400  | 3.824954  | 0.194848  | 69 | C | 6.096011  | -0.132464 | 2.929462  |
| 10 | C  | 1.175185   | 1.865677  | 0.098306  | 70 | H | 4.528321  | -0.521717 | 4.358920  |
| 11 | C  | 0.919103   | 4.622630  | 0.235523  | 71 | H | 7.457331  | 0.246397  | 1.303770  |
| 12 | H  | -1.204641  | 4.296865  | 0.218920  | 72 | H | 6.709352  | 0.673127  | -3.883186 |
| 13 | C  | 2.304082   | 2.662700  | 0.140678  | 73 | H | 6.869109  | -0.083930 | 3.690851  |
| 14 | C  | 2.198833   | 4.065823  | 0.209953  | 74 | N | 3.243366  | -0.304754 | -0.081033 |
| 15 | H  | 0.795210   | 5.698797  | 0.288821  | 75 | C | -0.988806 | -2.261089 | -0.006979 |
| 16 | H  | 3.283682   | 2.198142  | 0.117707  | 76 | C | -1.662966 | -3.507583 | 0.086889  |
| 17 | C  | -4.959513  | 0.898053  | -0.002666 | 77 | C | -0.962664 | -4.720669 | 0.035151  |
| 18 | C  | -5.492666  | 1.977242  | -0.720550 | 78 | C | 1.077520  | -3.415918 | -0.173392 |
| 19 | C  | -5.854699  | 0.074604  | 0.686382  | 79 | C | -1.817485 | -5.855475 | 0.166597  |
| 20 | C  | -6.859898  | 2.213638  | -0.744558 | 80 | C | 0.452034  | -4.692201 | -0.119207 |
| 21 | H  | -4.829489  | 2.624389  | -1.288487 | 81 | C | 2.480833  | -3.352742 | -0.312673 |
| 22 | C  | -7.225600  | 0.316694  | 0.657892  | 82 | C | -3.119596 | -5.500141 | 0.326019  |
| 23 | H  | -5.474879  | -0.754603 | 1.277872  | 83 | H | -1.481154 | -6.884306 | 0.151949  |
| 24 | C  | -7.763536  | 1.390580  | -0.057012 | 84 | C | 1.241822  | -5.857602 | -0.206554 |
| 25 | H  | -7.229404  | 3.056462  | -1.322745 | 85 | H | 2.953937  | -2.376957 | -0.348331 |
| 26 | H  | -7.876901  | -0.346575 | 1.217033  | 86 | C | 3.226399  | -4.506652 | -0.396524 |
| 27 | Au | 1.165816   | -0.150192 | -0.015301 | 87 | H | -3.972819 | -6.153933 | 0.453497  |
| 28 | C  | -9.263255  | 1.687185  | -0.112969 | 88 | C | 2.607891  | -5.769413 | -0.344109 |
| 29 | C  | -10.083127 | 0.686316  | 0.705518  | 89 | H | 0.761122  | -6.829681 | -0.166718 |
| 30 | H  | -9.808495  | 0.705394  | 1.765493  | 90 | H | 4.304404  | -4.436815 | -0.505317 |
| 31 | H  | -11.145791 | 0.939628  | 0.634686  | 91 | H | 3.207409  | -6.671837 | -0.412388 |
| 32 | H  | -9.962093  | -0.337606 | 0.336342  | 92 | C | -1.646073 | -0.940385 | 0.013513  |
| 33 | C  | -9.525634  | 3.095971  | 0.444484  | 93 | S | -3.364838 | -3.797348 | 0.319135  |
| 34 | H  | -8.998074  | 3.864789  | -0.128079 | 94 | N | 0.350857  | -2.249117 | -0.104993 |
| 35 | H  | -10.596355 | 3.325186  | 0.403392  |    |   |           |           |           |
| 36 | H  | -9.200892  | 3.170738  | 1.487454  |    |   |           |           |           |
| 37 | C  | -9.739689  | 1.621003  | -1.573603 |    |   |           |           |           |
| 38 | H  | -9.217006  | 2.345989  | -2.204827 |    |   |           |           |           |
| 39 | H  | -9.571325  | 0.624617  | -1.995213 |    |   |           |           |           |
| 40 | H  | -10.811937 | 1.839210  | -1.631673 |    |   |           |           |           |
| 41 | C  | 3.477361   | 4.905097  | 0.250133  |    |   |           |           |           |
| 42 | C  | 4.298633   | 4.640195  | -1.023284 |    |   |           |           |           |
| 43 | H  | 5.219607   | 5.233771  | -1.006270 |    |   |           |           |           |
| 44 | H  | 4.582328   | 3.587420  | -1.115566 |    |   |           |           |           |
| 45 | H  | 3.731805   | 4.916884  | -1.918451 |    |   |           |           |           |
| 46 | C  | 3.181179   | 6.405014  | 0.329698  |    |   |           |           |           |
| 47 | H  | 2.615306   | 6.755137  | -0.540214 |    |   |           |           |           |
| 48 | H  | 2.618622   | 6.661778  | 1.233688  |    |   |           |           |           |
| 49 | H  | 4.123279   | 6.961891  | 0.357068  |    |   |           |           |           |
| 50 | C  | 4.307861   | 4.509384  | 1.482843  |    |   |           |           |           |
| 51 | H  | 3.747285   | 4.689065  | 2.406220  |    |   |           |           |           |
| 52 | H  | 4.593872   | 3.453458  | 1.461488  |    |   |           |           |           |
| 53 | H  | 5.228037   | 5.103100  | 1.521805  |    |   |           |           |           |
| 54 | C  | 4.028079   | -0.046569 | -1.184659 |    |   |           |           |           |
| 55 | C  | 4.074946   | -0.267775 | 1.017558  |    |   |           |           |           |
| 56 | C  | 3.643267   | 0.038647  | -2.528937 |    |   |           |           |           |
| 57 | C  | 5.388811   | 0.132622  | -0.807070 |    |   |           |           |           |
| 58 | C  | 3.747021   | -0.452895 | 2.366785  |    |   |           |           |           |
| 59 | C  | 5.419219   | -0.010904 | 0.626501  |    |   |           |           |           |
| 60 | C  | 4.622122   | 0.298386  | -3.478727 |    |   |           |           |           |

**Table S8.** Cartesian coordinates of the optimized ground-state geometry of 4.

|    |    |            |           |           |    |   |           |           |           |
|----|----|------------|-----------|-----------|----|---|-----------|-----------|-----------|
| 1  | C  | -0.676292  | 0.063422  | -0.098879 | 61 | H | 3.073169  | 0.440648  | -2.537836 |
| 2  | C  | -2.890350  | -0.830908 | -0.071301 | 62 | C | 6.658959  | -0.517835 | -1.271080 |
| 3  | C  | -3.401115  | 0.474020  | -0.035059 | 63 | C | 4.349868  | -1.902198 | 3.394925  |
| 4  | C  | -2.527451  | 1.575457  | -0.040127 | 64 | H | 2.405280  | -1.338868 | 2.647797  |
| 5  | C  | -1.148405  | 1.377142  | -0.058288 | 65 | C | 6.244549  | -1.633565 | 1.904395  |
| 6  | H  | -3.595532  | -1.647704 | 0.006277  | 66 | C | 6.468524  | -0.013338 | -2.550474 |
| 7  | H  | -2.943394  | 2.579584  | -0.034996 | 67 | H | 5.053433  | 0.723523  | -4.002716 |
| 8  | C  | -0.058372  | 2.364061  | -0.034026 | 68 | H | 7.655931  | -0.781369 | -0.926153 |
| 9  | C  | -0.189307  | 3.748245  | -0.024762 | 69 | C | 5.727258  | -2.008391 | 3.137480  |
| 10 | C  | 1.249220   | 1.809199  | -0.020995 | 70 | H | 3.966152  | -2.192960 | 4.369341  |
| 11 | C  | 0.941191   | 4.567480  | -0.008132 | 71 | H | 7.311362  | -1.711317 | 1.708787  |
| 12 | H  | -1.176642  | 4.203806  | -0.034289 | 72 | H | 7.318964  | 0.119192  | -3.213022 |
| 13 | C  | 2.361387   | 2.631210  | -0.002354 | 73 | H | 6.390228  | -2.382128 | 3.912428  |
| 14 | C  | 2.231360   | 4.034411  | 0.000348  | 74 | N | 3.308014  | -0.573328 | 0.082525  |
| 15 | H  | 0.797536   | 5.642559  | -0.004495 | 75 | C | -0.791876 | -2.351600 | -0.176649 |
| 16 | H  | 3.348251   | 2.178716  | 0.002232  | 76 | C | -1.354683 | -3.637087 | -0.345176 |
| 17 | C  | -4.864799  | 0.688558  | 0.019063  | 77 | C | -0.479456 | -4.753987 | -0.309336 |
| 18 | C  | -5.420306  | 1.702003  | 0.812015  | 78 | C | 1.370710  | -3.315550 | -0.050460 |
| 19 | C  | -5.744218  | -0.109647 | -0.718203 | 79 | C | 0.896385  | -4.605964 | -0.150592 |
| 20 | C  | -6.793021  | 1.899409  | 0.861144  | 80 | C | -2.833422 | -5.399226 | -0.687789 |
| 21 | H  | -4.769363  | 2.326964  | 1.417649  | 81 | H | 2.428943  | -3.095925 | 0.045950  |
| 22 | C  | -7.120929  | 0.092257  | -0.663713 | 82 | H | 1.574996  | -5.450261 | -0.124198 |
| 23 | H  | -5.347233  | -0.884244 | -1.369467 | 83 | H | -3.739139 | -5.961996 | -0.871673 |
| 24 | C  | -7.680752  | 1.100500  | 0.125987  | 84 | C | -1.506426 | -1.058182 | -0.127301 |
| 25 | H  | -7.179601  | 2.691622  | 1.496808  | 85 | N | 0.556864  | -2.246917 | -0.061458 |
| 26 | H  | -7.759382  | -0.548619 | -1.262458 | 86 | C | -2.711215 | -4.053792 | -0.580875 |
| 27 | Au | 1.266281   | -0.208200 | -0.026213 | 87 | H | -3.556840 | -3.394111 | -0.702294 |
| 28 | C  | -9.186960  | 1.354495  | 0.209917  | 88 | S | -1.331287 | -6.244854 | -0.518285 |
| 29 | C  | -9.987995  | 0.383051  | -0.660989 |    |   |           |           |           |
| 30 | H  | -9.836563  | -0.657610 | -0.355177 |    |   |           |           |           |
| 31 | H  | -11.056205 | 0.603153  | -0.566785 |    |   |           |           |           |
| 32 | H  | -9.724161  | 0.473104  | -1.720049 |    |   |           |           |           |
| 33 | C  | -9.650403  | 1.190585  | 1.666964  |    |   |           |           |           |
| 34 | H  | -9.142292  | 1.890870  | 2.336763  |    |   |           |           |           |
| 35 | H  | -10.727432 | 1.376860  | 1.743986  |    |   |           |           |           |
| 36 | H  | -9.453387  | 0.175996  | 2.028457  |    |   |           |           |           |
| 37 | C  | -9.488121  | 2.786694  | -0.261939 |    |   |           |           |           |
| 38 | H  | -8.974566  | 3.533203  | 0.351478  |    |   |           |           |           |
| 39 | H  | -9.173570  | 2.930538  | -1.300790 |    |   |           |           |           |
| 40 | H  | -10.563706 | 2.986725  | -0.200547 |    |   |           |           |           |
| 41 | C  | 3.492202   | 4.900746  | 0.003451  |    |   |           |           |           |
| 42 | C  | 4.310560   | 4.603743  | -1.264785 |    |   |           |           |           |
| 43 | H  | 5.227939   | 5.203084  | -1.270345 |    |   |           |           |           |
| 44 | H  | 4.598348   | 3.549941  | -1.328800 |    |   |           |           |           |
| 45 | H  | 3.737268   | 4.850834  | -2.164597 |    |   |           |           |           |
| 46 | C  | 3.167484   | 6.396697  | 0.028003  |    |   |           |           |           |
| 47 | H  | 2.593020   | 6.703539  | -0.852489 |    |   |           |           |           |
| 48 | H  | 2.602095   | 6.675910  | 0.923536  |    |   |           |           |           |
| 49 | H  | 4.098765   | 6.972184  | 0.031538  |    |   |           |           |           |
| 50 | C  | 4.336862   | 4.570142  | 1.245281  |    |   |           |           |           |
| 51 | H  | 3.777258   | 4.773410  | 2.164311  |    |   |           |           |           |
| 52 | H  | 4.643974   | 3.520295  | 1.262481  |    |   |           |           |           |
| 53 | H  | 5.245074   | 5.183025  | 1.256411  |    |   |           |           |           |
| 54 | C  | 4.251565   | -0.334849 | -0.891830 |    |   |           |           |           |
| 55 | C  | 3.982209   | -1.055194 | 1.183291  |    |   |           |           |           |
| 56 | C  | 4.065928   | 0.173003  | -2.184919 |    |   |           |           |           |
| 57 | C  | 5.553448   | -0.679652 | -0.430120 |    |   |           |           |           |
| 58 | C  | 3.467690   | -1.428061 | 2.433036  |    |   |           |           |           |
| 59 | C  | 5.378056   | -1.152515 | 0.918291  |    |   |           |           |           |
| 60 | C  | 5.180662   | 0.329188  | -2.997958 |    |   |           |           |           |

**Table S9.** Cartesian coordinates of the optimized ground-state geometry of 6.

|    |    |            |           |           |    |   |           |           |           |
|----|----|------------|-----------|-----------|----|---|-----------|-----------|-----------|
| 1  | C  | -0.809575  | 0.190917  | 0.129088  | 61 | H | 2.485203  | 0.268432  | -2.828886 |
| 2  | C  | -3.040034  | -0.664757 | 0.024180  | 62 | C | 6.278652  | 0.575919  | -1.879446 |
| 3  | C  | -3.535506  | 0.645273  | 0.047837  | 63 | C | 4.838829  | -0.686494 | 3.158088  |
| 4  | C  | -2.646480  | 1.728975  | 0.146383  | 64 | H | 2.767304  | -0.840267 | 2.567487  |
| 5  | C  | -1.270859  | 1.509586  | 0.174799  | 65 | C | 6.452665  | -0.110927 | 1.440172  |
| 6  | H  | -3.749742  | -1.475139 | -0.079878 | 66 | C | 5.850029  | 0.801872  | -3.180895 |
| 7  | H  | -3.044361  | 2.740331  | 0.148555  | 67 | H | 4.175527  | 0.871999  | -4.538826 |
| 8  | C  | -0.177157  | 2.487401  | 0.221955  | 68 | H | 7.331790  | 0.663920  | -1.623614 |
| 9  | C  | -0.294483  | 3.870055  | 0.314402  | 69 | C | 6.161516  | -0.426468 | 2.760780  |
| 10 | C  | 1.123785   | 1.926221  | 0.176775  | 70 | H | 4.633061  | -0.929412 | 4.197204  |
| 11 | C  | 0.843213   | 4.677220  | 0.364152  | 71 | H | 7.476695  | 0.090871  | 1.135330  |
| 12 | H  | -1.277828  | 4.332537  | 0.351605  | 72 | H | 6.569781  | 1.068058  | -3.949560 |
| 13 | C  | 2.245610   | 2.732067  | 0.230482  | 73 | H | 6.960311  | -0.472496 | 3.495330  |
| 14 | C  | 2.127937   | 4.132842  | 0.324827  | 74 | N | 3.208251  | -0.231583 | -0.149958 |
| 15 | H  | 0.709824   | 5.751163  | 0.436238  | 75 | C | -0.981063 | -2.219859 | 0.096405  |
| 16 | H  | 3.228653   | 2.275457  | 0.193779  | 76 | C | -1.636102 | -3.464989 | 0.346076  |
| 17 | C  | -4.993929  | 0.886103  | -0.037905 | 77 | C | -0.901140 | -4.644942 | 0.177014  |
| 18 | C  | -5.606760  | 1.890967  | 0.722725  | 78 | C | 1.066614  | -3.343703 | -0.305225 |
| 19 | C  | -5.809477  | 0.124137  | -0.879431 | 79 | C | 0.464871  | -4.628600 | -0.192278 |
| 20 | C  | -6.973833  | 2.115816  | 0.640822  | 80 | C | 2.438530  | -3.266050 | -0.627273 |
| 21 | H  | -5.007868  | 2.487780  | 1.405631  | 81 | C | -3.209336 | -5.065534 | 0.948347  |
| 22 | C  | -7.180653  | 0.354149  | -0.956620 | 82 | C | 1.240139  | -5.786782 | -0.410189 |
| 23 | H  | -5.365199  | -0.643799 | -1.507534 | 83 | H | 2.896593  | -2.285580 | -0.703462 |
| 24 | C  | -7.798067  | 1.354300  | -0.200092 | 84 | C | 3.172540  | -4.412113 | -0.834359 |
| 25 | H  | -7.407171  | 2.900089  | 1.255879  | 85 | H | -4.118015 | -5.540181 | 1.293679  |
| 26 | H  | -7.767666  | -0.258517 | -1.632535 | 86 | C | 2.574032  | -5.682039 | -0.728021 |
| 27 | Au | 1.135545   | -0.084721 | -0.000729 | 87 | H | 0.771377  | -6.763235 | -0.324485 |
| 28 | C  | -9.300324  | 1.637314  | -0.259672 | 88 | H | 4.225607  | -4.331387 | -1.085561 |
| 29 | C  | -10.027495 | 0.705630  | -1.232820 | 89 | H | 3.164857  | -6.576899 | -0.896378 |
| 30 | H  | -9.926043  | -0.345559 | -0.942820 | 90 | C | -1.659826 | -0.910034 | 0.097857  |
| 31 | H  | -11.095668 | 0.945180  | -1.239220 | 91 | N | 0.338130  | -2.188310 | -0.142723 |
| 32 | H  | -9.657407  | 0.817811  | -2.257390 | 92 | C | -2.967633 | -3.737655 | 0.815361  |
| 33 | C  | -9.910251  | 1.445196  | 1.138814  | 93 | H | -3.695508 | -2.990932 | 1.096279  |
| 34 | H  | -9.459126  | 2.117106  | 1.875213  | 94 | S | -1.847431 | -6.045797 | 0.526848  |
| 35 | H  | -10.986065 | 1.651693  | 1.113479  |    |   |           |           |           |
| 36 | H  | -9.768815  | 0.417609  | 1.489507  |    |   |           |           |           |
| 37 | C  | -9.527228  | 3.087136  | -0.718991 |    |   |           |           |           |
| 38 | H  | -9.064108  | 3.806881  | -0.037243 |    |   |           |           |           |
| 39 | H  | -9.108163  | 3.251314  | -1.717116 |    |   |           |           |           |
| 40 | H  | -10.599846 | 3.307499  | -0.758974 |    |   |           |           |           |
| 41 | C  | 3.398912   | 4.983011  | 0.372473  |    |   |           |           |           |
| 42 | C  | 4.211464   | 4.751520  | -0.913079 |    |   |           |           |           |
| 43 | H  | 5.128246   | 5.351394  | -0.891010 |    |   |           |           |           |
| 44 | H  | 4.501565   | 3.703019  | -1.030818 |    |   |           |           |           |
| 45 | H  | 3.635012   | 5.043231  | -1.797249 |    |   |           |           |           |
| 46 | C  | 3.089766   | 6.478166  | 0.485291  |    |   |           |           |           |
| 47 | H  | 2.514785   | 6.841100  | -0.373300 |    |   |           |           |           |
| 48 | H  | 2.531152   | 6.710897  | 1.398209  |    |   |           |           |           |
| 49 | H  | 4.026950   | 7.042998  | 0.517751  |    |   |           |           |           |
| 50 | C  | 4.243441   | 4.570013  | 1.589765  |    |   |           |           |           |
| 51 | H  | 3.689138   | 4.724920  | 2.521380  |    |   |           |           |           |
| 52 | H  | 4.539300   | 3.517633  | 1.543704  |    |   |           |           |           |
| 53 | H  | 5.158326   | 5.171464  | 1.633444  |    |   |           |           |           |
| 54 | C  | 3.962308   | 0.121539  | -1.248385 |    |   |           |           |           |
| 55 | C  | 4.075449   | -0.323350 | 0.917161  |    |   |           |           |           |
| 56 | C  | 3.536450   | 0.350019  | -2.563417 |    |   |           |           |           |
| 57 | C  | 5.338236   | 0.236143  | -0.901575 |    |   |           |           |           |
| 58 | C  | 3.788253   | -0.639530 | 2.251466  |    |   |           |           |           |
| 59 | C  | 5.411917   | -0.053987 | 0.507831  |    |   |           |           |           |
| 60 | C  | 4.489346   | 0.689298  | -3.514501 |    |   |           |           |           |

**Table S10.** Cartesian coordinates of the optimized  $T_1$  geometry of **1** computed by DFT/CPCM.

|    |    |            |           |           |    |   |           |           |           |
|----|----|------------|-----------|-----------|----|---|-----------|-----------|-----------|
| 1  | C  | -0.649779  | 0.013854  | -0.015925 | 61 | H | 2.877461  | 0.190610  | -2.612764 |
| 2  | C  | -2.870397  | -0.859426 | -0.038869 | 62 | C | 6.593272  | -0.627672 | -1.619816 |
| 3  | C  | -3.362855  | 0.447906  | -0.005895 | 63 | C | 4.651759  | -1.715644 | 3.307611  |
| 4  | C  | -2.480507  | 1.550026  | 0.023639  | 64 | H | 2.648449  | -1.233317 | 2.627493  |
| 5  | C  | -1.104175  | 1.330901  | 0.023315  | 65 | C | 6.448452  | -1.522478 | 1.658929  |
| 6  | H  | -3.586990  | -1.673604 | -0.019202 | 66 | C | 6.259541  | -0.212498 | -2.921639 |
| 7  | H  | -2.883559  | 2.558721  | 0.018476  | 67 | H | 4.719211  | 0.397669  | -4.293357 |
| 8  | C  | -0.008312  | 2.310617  | 0.054655  | 68 | H | 7.625400  | -0.847524 | -1.364152 |
| 9  | C  | -0.135951  | 3.693744  | 0.087361  | 69 | C | 6.000739  | -1.816827 | 2.959430  |
| 10 | C  | 1.294450   | 1.741905  | 0.050774  | 70 | H | 4.340606  | -1.948903 | 4.320541  |
| 11 | C  | 0.995575   | 4.513276  | 0.114351  | 71 | H | 7.502300  | -1.607128 | 1.411551  |
| 12 | H  | -1.123158  | 4.149770  | 0.091079  | 72 | H | 7.046353  | -0.115925 | -3.663426 |
| 13 | C  | 2.405092   | 2.571515  | 0.080159  | 73 | H | 6.721736  | -2.128912 | 3.708683  |
| 14 | C  | 2.282623   | 3.975779  | 0.110870  | 74 | N | 3.387409  | -0.623853 | 0.003927  |
| 15 | H  | 0.853358   | 5.588399  | 0.137975  | 75 | C | -0.794723 | -2.383658 | -0.088983 |
| 16 | H  | 3.398218   | 2.129855  | 0.078115  | 76 | C | -1.335512 | -3.683403 | -0.148064 |
| 17 | C  | -4.825617  | 0.678635  | 0.003668  | 77 | C | -0.523649 | -4.836229 | -0.181129 |
| 18 | C  | -5.393451  | 1.713386  | 0.760462  | 78 | C | 1.387091  | -3.387563 | -0.105623 |
| 19 | C  | -5.696485  | -0.123162 | -0.741012 | 79 | C | 0.895676  | -4.659048 | -0.156890 |
| 20 | C  | -6.764827  | 1.927546  | 0.769007  | 80 | C | -1.279711 | -6.037626 | -0.241646 |
| 21 | H  | -4.751417  | 2.343100  | 1.370680  | 81 | C | -2.628332 | -5.824751 | -0.256645 |
| 22 | C  | -7.071837  | 0.094379  | -0.727005 | 82 | H | 2.457487  | -3.205285 | -0.091844 |
| 23 | H  | -5.291183  | -0.918006 | -1.361658 | 83 | H | 1.569794  | -5.507671 | -0.184543 |
| 24 | C  | -7.642139  | 1.124266  | 0.026565  | 84 | H | -0.831711 | -7.024982 | -0.273337 |
| 25 | H  | -7.158855  | 2.736714  | 1.378764  | 85 | H | -3.426273 | -6.553170 | -0.298222 |
| 26 | H  | -7.700691  | -0.553260 | -1.328932 | 86 | C | -1.481393 | -1.122940 | -0.052302 |
| 27 | Au | 1.280590   | -0.293964 | -0.008243 | 87 | S | -3.019447 | -4.134943 | -0.197353 |
| 28 | C  | -9.147442  | 1.395249  | 0.065965  | 88 | N | 0.609422  | -2.273892 | -0.070434 |
| 29 | C  | -9.935695  | 0.417266  | -0.809351 |    |   |           |           |           |
| 30 | H  | -9.803043  | -0.619289 | -0.481852 |    |   |           |           |           |
| 31 | H  | -11.003873 | 0.649828  | -0.748220 |    |   |           |           |           |
| 32 | H  | -9.641548  | 0.485615  | -1.862025 |    |   |           |           |           |
| 33 | C  | -9.651897  | 1.260920  | 1.512354  |    |   |           |           |           |
| 34 | H  | -9.152829  | 1.966496  | 2.183481  |    |   |           |           |           |
| 35 | H  | -10.728648 | 1.460016  | 1.558456  |    |   |           |           |           |
| 36 | H  | -9.475141  | 0.250493  | 1.895349  |    |   |           |           |           |
| 37 | C  | -9.422682  | 2.821823  | -0.437428 |    |   |           |           |           |
| 38 | H  | -8.916606  | 3.573371  | 0.176114  |    |   |           |           |           |
| 39 | H  | -9.079771  | 2.944539  | -1.470053 |    |   |           |           |           |
| 40 | H  | -10.497481 | 3.034114  | -0.407234 |    |   |           |           |           |
| 41 | C  | 3.546209   | 4.839377  | 0.135700  |    |   |           |           |           |
| 42 | C  | 4.379702   | 4.559277  | -1.126203 |    |   |           |           |           |
| 43 | H  | 5.294469   | 5.162996  | -1.118860 |    |   |           |           |           |
| 44 | H  | 4.673656   | 3.507233  | -1.194685 |    |   |           |           |           |
| 45 | H  | 3.813832   | 4.809349  | -2.029756 |    |   |           |           |           |
| 46 | C  | 3.225405   | 6.336002  | 0.174117  |    |   |           |           |           |
| 47 | H  | 2.656904   | 6.652505  | -0.706666 |    |   |           |           |           |
| 48 | H  | 2.653263   | 6.605941  | 1.067963  |    |   |           |           |           |
| 49 | H  | 4.157448   | 6.910401  | 0.190947  |    |   |           |           |           |
| 50 | C  | 4.378368   | 4.494921  | 1.382171  |    |   |           |           |           |
| 51 | H  | 3.809363   | 4.690482  | 2.297009  |    |   |           |           |           |
| 52 | H  | 4.679646   | 3.442905  | 1.392345  |    |   |           |           |           |
| 53 | H  | 5.289307   | 5.103714  | 1.410261  |    |   |           |           |           |
| 54 | C  | 4.240275   | -0.449052 | -1.059306 |    |   |           |           |           |
| 55 | C  | 4.145763   | -1.027708 | 1.077036  |    |   |           |           |           |
| 56 | C  | 3.907312   | -0.034921 | -2.352895 |    |   |           |           |           |
| 57 | C  | 5.581554   | -0.744513 | -0.688317 |    |   |           |           |           |
| 58 | C  | 3.700075   | -1.318266 | 2.370606  |    |   |           |           |           |
| 59 | C  | 5.519232   | -1.127349 | 0.718176  |    |   |           |           |           |
| 60 | C  | 4.941075   | 0.078594  | -3.280328 |    |   |           |           |           |

**Table S11.** Cartesian coordinates of the optimized T<sub>1</sub> geometry of **3** computed by DFT/CPCM.

|    |    |            |           |           |    |   |           |           |           |
|----|----|------------|-----------|-----------|----|---|-----------|-----------|-----------|
| 1  | C  | -0.813219  | 0.205539  | -0.117515 | 61 | H | 2.919204  | 0.793324  | -2.575568 |
| 2  | C  | -3.004389  | -0.736841 | -0.117002 | 62 | C | 6.583099  | 0.464451  | -1.188270 |
| 3  | C  | -3.542548  | 0.552515  | -0.051502 | 63 | C | 4.309137  | -1.351646 | 3.368406  |
| 4  | C  | -2.695582  | 1.676706  | 0.003500  | 64 | H | 2.342511  | -1.125623 | 2.481785  |
| 5  | C  | -1.312286  | 1.503990  | -0.034054 | 65 | C | 6.221393  | -0.733057 | 1.974625  |
| 6  | H  | -3.689326  | -1.571840 | -0.218346 | 66 | C | 6.334462  | 0.936840  | -2.488650 |
| 7  | H  | -3.128124  | 2.667614  | 0.108983  | 67 | H | 4.878023  | 1.422133  | -3.995661 |
| 8  | C  | -0.254467  | 2.517589  | 0.052619  | 68 | H | 7.602085  | 0.381606  | -0.822604 |
| 9  | C  | -0.434784  | 3.891701  | 0.158003  | 69 | C | 5.686860  | -1.211360 | 3.184022  |
| 10 | C  | 1.066211   | 1.996808  | 0.044805  | 70 | H | 3.930117  | -1.724982 | 4.314007  |
| 11 | C  | 0.663210   | 4.748331  | 0.260378  | 71 | H | 7.295774  | -0.632723 | 1.854035  |
| 12 | H  | -1.438495  | 4.309806  | 0.162466  | 72 | H | 7.173009  | 1.216558  | -3.118904 |
| 13 | C  | 2.143290   | 2.862291  | 0.154631  | 73 | H | 6.361713  | -1.477642 | 3.991638  |
| 14 | C  | 1.968274   | 4.256846  | 0.264132  | 74 | N | 3.256972  | -0.163709 | 0.024491  |
| 15 | H  | 0.480731   | 5.814522  | 0.341091  | 75 | C | -0.884422 | -2.193447 | -0.163691 |
| 16 | H  | 3.152847   | 2.463260  | 0.156540  | 76 | C | -1.411598 | -3.480065 | 0.049300  |
| 17 | C  | -5.011790  | 0.735353  | -0.040384 | 77 | C | -0.616912 | -4.636448 | -0.006746 |
| 18 | C  | -5.615707  | 1.809237  | -0.709148 | 78 | C | 1.271947  | -3.181316 | -0.591794 |
| 19 | C  | -5.851510  | -0.152724 | 0.638952  | 79 | C | -1.345549 | -5.819210 | 0.295230  |
| 20 | C  | -6.993217  | 1.979158  | -0.695723 | 80 | C | 0.767434  | -4.499803 | -0.388983 |
| 21 | H  | -4.997345  | 2.506471  | -1.268311 | 81 | C | 2.593233  | -3.052382 | -1.059135 |
| 22 | C  | -7.233002  | 0.021217  | 0.647410  | 82 | C | -2.659078 | -5.582436 | 0.574763  |
| 23 | H  | -5.417288  | -0.982227 | 1.190997  | 83 | H | -0.915968 | -6.814369 | 0.305217  |
| 24 | C  | -7.839834  | 1.090336  | -0.017878 | 84 | C | 1.613717  | -5.599703 | -0.587298 |
| 25 | H  | -7.416527  | 2.821835  | -1.236507 | 85 | H | 2.962857  | -2.064110 | -1.299692 |
| 26 | H  | -7.837639  | -0.693072 | 1.196313  | 86 | C | 3.410537  | -4.156590 | -1.248864 |
| 27 | Au | 1.132038   | -0.039129 | -0.134816 | 87 | H | -3.430940 | -6.296147 | 0.828048  |
| 28 | C  | -9.353238  | 1.314657  | -0.030443 | 88 | C | 2.929221  | -5.442474 | -0.999980 |
| 29 | C  | -10.104616 | 0.245030  | 0.766632  | 89 | H | 1.220686  | -6.598514 | -0.420205 |
| 30 | H  | -9.806256  | 0.238442  | 1.820323  | 90 | H | 4.425317  | -4.011371 | -1.609326 |
| 31 | H  | -11.179918 | 0.447560  | 0.728243  | 91 | H | 3.564778  | -6.310349 | -1.146715 |
| 32 | H  | -9.941604  | -0.757280 | 0.356654  | 92 | C | -1.608859 | -0.948491 | -0.130337 |
| 33 | C  | -9.670924  | 2.686914  | 0.586140  | 93 | S | -3.053414 | -3.896511 | 0.482247  |
| 34 | H  | -9.192369  | 3.501019  | 0.033383  | 94 | N | 0.493083  | -2.063241 | -0.371373 |
| 35 | H  | -10.752063 | 2.866074  | 0.575756  |    |   |           |           |           |
| 36 | H  | -9.326885  | 2.737740  | 1.624414  |    |   |           |           |           |
| 37 | C  | -9.861019  | 1.279523  | -1.481485 |    |   |           |           |           |
| 38 | H  | -9.389029  | 2.052434  | -2.095596 |    |   |           |           |           |
| 39 | H  | -9.653646  | 0.309208  | -1.944472 |    |   |           |           |           |
| 40 | H  | -10.943895 | 1.446044  | -1.508285 |    |   |           |           |           |
| 41 | C  | 3.199134   | 5.159716  | 0.377020  |    |   |           |           |           |
| 42 | C  | 4.070449   | 4.992598  | -0.879447 |    |   |           |           |           |
| 43 | H  | 4.961730   | 5.626672  | -0.809817 |    |   |           |           |           |
| 44 | H  | 4.404887   | 3.958523  | -1.009288 |    |   |           |           |           |
| 45 | H  | 3.516415   | 5.281774  | -1.778668 |    |   |           |           |           |
| 46 | C  | 2.822862   | 6.638296  | 0.505416  |    |   |           |           |           |
| 47 | H  | 2.265687   | 6.993489  | -0.367822 |    |   |           |           |           |
| 48 | H  | 2.219097   | 6.827616  | 1.399184  |    |   |           |           |           |
| 49 | H  | 3.732584   | 7.242247  | 0.585638  |    |   |           |           |           |
| 50 | C  | 4.014980   | 4.762584  | 1.618677  |    |   |           |           |           |
| 51 | H  | 3.418476   | 4.875200  | 2.529935  |    |   |           |           |           |
| 52 | H  | 4.357029   | 3.724322  | 1.566888  |    |   |           |           |           |
| 53 | H  | 4.900812   | 5.401406  | 1.709730  |    |   |           |           |           |
| 54 | C  | 4.184826   | 0.235348  | -0.911365 |    |   |           |           |           |
| 55 | C  | 3.947556   | -0.544246 | 1.150009  |    |   |           |           |           |
| 56 | C  | 3.935715   | 0.703763  | -2.204611 |    |   |           |           |           |
| 57 | C  | 5.505466   | 0.113422  | -0.399171 |    |   |           |           |           |
| 58 | C  | 3.415353   | -1.019771 | 2.352921  |    |   |           |           |           |
| 59 | C  | 5.349754   | -0.399685 | 0.957541  |    |   |           |           |           |
| 60 | C  | 5.034457   | 1.053835  | -2.987116 |    |   |           |           |           |

**Table S12.** Cartesian coordinates of the optimized T<sub>1</sub> geometry of **4** computed by DFT/CPCM.

|    |    |            |           |           |    |   |           |           |           |
|----|----|------------|-----------|-----------|----|---|-----------|-----------|-----------|
| 1  | C  | -0.687011  | 0.045430  | -0.067107 | 61 | H | 2.882864  | 0.182450  | -2.593929 |
| 2  | C  | -2.902671  | -0.837214 | -0.048191 | 62 | C | 6.589979  | -0.569742 | -1.519951 |
| 3  | C  | -3.399878  | 0.466478  | -0.039459 | 63 | C | 4.578364  | -1.555595 | 3.400734  |
| 4  | C  | -2.525081  | 1.576930  | -0.049332 | 64 | H | 2.581849  | -1.111227 | 2.676471  |
| 5  | C  | -1.148086  | 1.360148  | -0.047478 | 65 | C | 6.399964  | -1.384016 | 1.777366  |
| 6  | H  | -3.616059  | -1.647312 | 0.039796  | 66 | C | 6.273813  | -0.190792 | -2.836995 |
| 7  | H  | -2.933110  | 2.583061  | -0.077030 | 67 | H | 4.750172  | 0.368150  | -4.248574 |
| 8  | C  | -0.058751  | 2.347833  | -0.023866 | 68 | H | 7.619950  | -0.771853 | -1.241862 |
| 9  | C  | -0.196051  | 3.730287  | -0.025265 | 69 | C | 5.933990  | -1.650682 | 3.077301  |
| 10 | C  | 1.247574   | 1.789163  | 0.004851  | 70 | H | 4.253012  | -1.766351 | 4.414152  |
| 11 | C  | 0.929711   | 4.558452  | -0.002474 | 71 | H | 7.458665  | -1.462862 | 1.549530  |
| 12 | H  | -1.186267  | 4.179264  | -0.045657 | 72 | H | 7.071837  | -0.103952 | -3.567932 |
| 13 | C  | 2.352323   | 2.626395  | 0.030191  | 73 | H | 6.645746  | -1.935721 | 3.845921  |
| 14 | C  | 2.220104   | 4.030394  | 0.024537  | 74 | N | 3.356900  | -0.561647 | 0.050182  |
| 15 | H  | 0.779804   | 5.632819  | -0.006945 | 75 | C | -0.818595 | -2.356477 | -0.106870 |
| 16 | H  | 3.348287   | 2.191731  | 0.053484  | 76 | C | -1.357304 | -3.681291 | -0.223223 |
| 17 | C  | -4.863531  | 0.688455  | -0.002431 | 77 | C | -0.485213 | -4.776622 | -0.143618 |
| 18 | C  | -5.422557  | 1.731334  | 0.750049  | 78 | C | 1.378076  | -3.324615 | 0.041584  |
| 19 | C  | -5.745294  | -0.129209 | -0.716537 | 79 | C | 0.916393  | -4.613925 | 0.008131  |
| 20 | C  | -6.794937  | 1.936273  | 0.785391  | 80 | C | -2.836236 | -5.471457 | -0.495895 |
| 21 | H  | -4.771176  | 2.375004  | 1.335285  | 81 | H | 2.442098  | -3.122362 | 0.119839  |
| 22 | C  | -7.121712  | 0.078600  | -0.675710 | 82 | H | 1.598927  | -5.452644 | 0.065295  |
| 23 | H  | -5.346761  | -0.928197 | -1.336388 | 83 | H | -3.739504 | -6.045809 | -0.649797 |
| 24 | C  | -7.682766  | 1.115652  | 0.074924  | 84 | C | -1.509806 | -1.105456 | -0.084997 |
| 25 | H  | -7.181311  | 2.752390  | 1.390851  | 85 | N | 0.581279  | -2.235552 | -0.018465 |
| 26 | H  | -7.759045  | -0.581489 | -1.254863 | 86 | C | -2.708005 | -4.116667 | -0.439127 |
| 27 | Au | 1.244997   | -0.247506 | -0.008665 | 87 | H | -3.555921 | -3.460447 | -0.575818 |
| 28 | C  | -9.188724  | 1.377271  | 0.142972  | 88 | S | -1.322643 | -6.282155 | -0.303281 |
| 29 | C  | -9.989086  | 0.380506  | -0.699568 |    |   |           |           |           |
| 30 | H  | -9.841890  | -0.649944 | -0.359192 |    |   |           |           |           |
| 31 | H  | -11.057304 | 0.606687  | -0.618419 |    |   |           |           |           |
| 32 | H  | -9.718708  | 0.434534  | -1.759432 |    |   |           |           |           |
| 33 | C  | -9.660715  | 1.262341  | 1.601931  |    |   |           |           |           |
| 34 | H  | -9.151630  | 1.981304  | 2.250943  |    |   |           |           |           |
| 35 | H  | -10.737466 | 1.455524  | 1.668627  |    |   |           |           |           |
| 36 | H  | -9.469109  | 0.259100  | 1.996549  |    |   |           |           |           |
| 37 | C  | -9.484855  | 2.793895  | -0.376378 |    |   |           |           |           |
| 38 | H  | -8.970789  | 3.558231  | 0.214272  |    |   |           |           |           |
| 39 | H  | -9.165224  | 2.902708  | -1.417989 |    |   |           |           |           |
| 40 | H  | -10.560195 | 2.999576  | -0.326107 |    |   |           |           |           |
| 41 | C  | 3.477497   | 4.903077  | 0.044995  |    |   |           |           |           |
| 42 | C  | 4.330381   | 4.597295  | -1.197857 |    |   |           |           |           |
| 43 | H  | 5.240970   | 5.207360  | -1.193207 |    |   |           |           |           |
| 44 | H  | 4.632171   | 3.545919  | -1.235853 |    |   |           |           |           |
| 45 | H  | 3.775437   | 4.820661  | -2.115088 |    |   |           |           |           |
| 46 | C  | 3.146385   | 6.397944  | 0.041264  |    |   |           |           |           |
| 47 | H  | 2.587871   | 6.688186  | -0.854828 |    |   |           |           |           |
| 48 | H  | 2.560194   | 6.686242  | 0.920149  |    |   |           |           |           |
| 49 | H  | 4.074280   | 6.979106  | 0.056218  |    |   |           |           |           |
| 50 | C  | 4.294588   | 4.595885  | 1.311001  |    |   |           |           |           |
| 51 | H  | 3.711705   | 4.810626  | 2.212715  |    |   |           |           |           |
| 52 | H  | 4.602282   | 3.546476  | 1.351883  |    |   |           |           |           |
| 53 | H  | 5.201202   | 5.211263  | 1.336175  |    |   |           |           |           |
| 54 | C  | 4.225954   | -0.403453 | -1.002663 |    |   |           |           |           |
| 55 | C  | 4.101925   | -0.929576 | 1.145257  |    |   |           |           |           |
| 56 | C  | 3.910543   | -0.025277 | -2.311595 |    |   |           |           |           |
| 57 | C  | 5.563993   | -0.674497 | -0.602535 |    |   |           |           |           |
| 58 | C  | 3.638245   | -1.192290 | 2.438598  |    |   |           |           |           |
| 59 | C  | 5.482349   | -1.022943 | 0.811721  |    |   |           |           |           |
| 60 | C  | 4.958455   | 0.076698  | -3.224384 |    |   |           |           |           |



**Table S13.** Cartesian coordinates of the optimized T<sub>1</sub> geometry of **6** computed by DFT/CPCM.

|    |    |            |           |           |    |   |           |           |           |
|----|----|------------|-----------|-----------|----|---|-----------|-----------|-----------|
| 1  | C  | -0.849868  | 0.237465  | -0.063480 | 61 | H | 2.852536  | 0.941906  | -2.547857 |
| 2  | C  | -3.028475  | -0.731628 | -0.078445 | 62 | C | 6.535779  | 0.564054  | -1.225938 |
| 3  | C  | -3.581866  | 0.550732  | -0.037713 | 63 | C | 4.324318  | -1.395863 | 3.302094  |
| 4  | C  | -2.750742  | 1.688052  | 0.024899  | 64 | H | 2.345541  | -1.138482 | 2.450225  |
| 5  | C  | -1.365398  | 1.530294  | 0.003250  | 65 | C | 6.217721  | -0.734628 | 1.902008  |
| 6  | H  | -3.702577  | -1.577254 | -0.145381 | 66 | C | 6.2269143 | 1.077270  | -2.507105 |
| 7  | H  | -3.197145  | 2.677856  | 0.053475  | 67 | H | 4.791767  | 1.611316  | -3.976806 |
| 8  | C  | -0.320108  | 2.558775  | 0.069138  | 68 | H | 7.559842  | 0.468399  | -0.877990 |
| 9  | C  | -0.518281  | 3.931412  | 0.160326  | 69 | C | 5.699532  | -1.251522 | 3.102632  |
| 10 | C  | 1.007577   | 2.055473  | 0.058989  | 70 | H | 3.958230  | -1.799946 | 4.240132  |
| 11 | C  | 0.568622   | 4.803913  | 0.247683  | 71 | H | 7.290505  | -0.632419 | 1.769310  |
| 12 | H  | -1.527511  | 4.336080  | 0.165732  | 72 | H | 7.098932  | 1.375474  | -3.140481 |
| 13 | C  | 2.073330   | 2.936761  | 0.154251  | 73 | H | 6.385369  | -1.545395 | 3.891213  |
| 14 | C  | 1.880139   | 4.330040  | 0.250437  | 74 | N | 3.226317  | -0.097080 | 0.015022  |
| 15 | H  | 0.372151   | 5.868391  | 0.317737  | 75 | C | -0.885160 | -2.161892 | -0.072377 |
| 16 | H  | 3.088186   | 2.551103  | 0.155135  | 76 | C | -1.387012 | -3.463027 | 0.217305  |
| 17 | C  | -5.053692  | 0.716627  | -0.063057 | 77 | C | -0.542850 | -4.565872 | 0.071968  |
| 18 | C  | -5.686184  | 1.697847  | 0.713208  | 78 | C | 1.267601  | -3.105693 | -0.619446 |
| 19 | C  | -5.867622  | -0.094649 | -0.859588 | 79 | C | 0.797940  | -4.437950 | -0.412914 |
| 20 | C  | -7.065503  | 1.851670  | 0.691016  | 80 | C | 2.557197  | -2.951333 | -1.161403 |
| 21 | H  | -5.088847  | 2.333182  | 1.361845  | 81 | C | -2.777617 | -5.200076 | 0.918238  |
| 22 | C  | -7.251309  | 0.062603  | -0.876659 | 82 | C | 1.638866  | -5.525311 | -0.685706 |
| 23 | H  | -5.411656  | -0.847053 | -1.497773 | 83 | H | 2.900702  | -1.953604 | -1.402922 |
| 24 | C  | -7.886368  | 1.038537  | -0.103442 | 84 | C | 3.373137  | -4.042916 | -1.423782 |
| 25 | H  | -7.510980  | 2.620620  | 1.317122  | 85 | H | -3.627809 | -5.748228 | 1.301840  |
| 26 | H  | -7.834758  | -0.588828 | -1.518874 | 86 | C | 2.924192  | -5.340739 | -1.176225 |
| 27 | Au | 1.098209   | 0.019036  | -0.109052 | 87 | H | 1.265771  | -6.531782 | -0.511009 |
| 28 | C  | -9.402618  | 1.243378  | -0.097776 | 88 | H | 4.362549  | -3.877277 | -1.841354 |
| 29 | C  | -10.123695 | 0.261368  | -1.024955 | 89 | H | 3.560234  | -6.196094 | -1.381388 |
| 30 | H  | -9.953503  | -0.778665 | -0.727135 | 90 | C | -1.628685 | -0.932040 | -0.064863 |
| 31 | H  | -11.202359 | 0.444912  | -0.985478 | 91 | N | 0.481100  | -2.010057 | -0.334620 |
| 32 | H  | -9.806081  | 0.377236  | -2.066582 | 92 | C | -2.675498 | -3.859740 | 0.721940  |
| 33 | C  | -9.939488  | 1.041198  | 1.328863  | 93 | H | -3.477026 | -3.179083 | 0.973385  |
| 34 | H  | -9.489913  | 1.745196  | 2.035684  | 94 | S | -1.326293 | -6.047954 | 0.515446  |
| 35 | H  | -11.024631 | 1.193008  | 1.350481  |    |   |           |           |           |
| 36 | H  | -9.729971  | 0.027221  | 1.685078  |    |   |           |           |           |
| 37 | C  | -9.725481  | 2.672528  | -0.564305 |    |   |           |           |           |
| 38 | H  | -9.269228  | 3.424582  | 0.086554  |    |   |           |           |           |
| 39 | H  | -9.360216  | 2.842980  | -1.582370 |    |   |           |           |           |
| 40 | H  | -10.808843 | 2.838006  | -0.558311 |    |   |           |           |           |
| 41 | C  | 3.098989   | 5.250799  | 0.348561  |    |   |           |           |           |
| 42 | C  | 3.966112   | 5.083968  | -0.910832 |    |   |           |           |           |
| 43 | H  | 4.849057   | 5.730696  | -0.851806 |    |   |           |           |           |
| 44 | H  | 4.313773   | 4.053342  | -1.033033 |    |   |           |           |           |
| 45 | H  | 3.403485   | 5.357316  | -1.809687 |    |   |           |           |           |
| 46 | C  | 2.703132   | 6.725254  | 0.465128  |    |   |           |           |           |
| 47 | H  | 2.136930   | 7.064684  | -0.408575 |    |   |           |           |           |
| 48 | H  | 2.101064   | 6.914539  | 1.360056  |    |   |           |           |           |
| 49 | H  | 3.604861   | 7.342334  | 0.535298  |    |   |           |           |           |
| 50 | C  | 3.926645   | 4.876819  | 1.589554  |    |   |           |           |           |
| 51 | H  | 3.333297   | 4.989881  | 2.502825  |    |   |           |           |           |
| 52 | H  | 4.282646   | 3.842911  | 1.545758  |    |   |           |           |           |
| 53 | H  | 4.804042   | 5.528603  | 1.669932  |    |   |           |           |           |
| 54 | C  | 4.141287   | 0.329874  | -0.921110 |    |   |           |           |           |
| 55 | C  | 3.932806   | -0.515068 | 1.117041  |    |   |           |           |           |
| 56 | C  | 3.874306   | 0.838785  | -2.195365 |    |   |           |           |           |
| 57 | C  | 5.469112   | 0.189868  | -0.432543 |    |   |           |           |           |
| 58 | C  | 3.416811   | -1.029403 | 2.310932  |    |   |           |           |           |
| 59 | C  | 5.332305   | -0.366517 | 0.909072  |    |   |           |           |           |
| 60 | C  | 4.962224   | 1.211443  | -2.982652 |    |   |           |           |           |

**Table S14.** Cartesian coordinates of the optimized S<sub>1</sub> geometry of **1** computed by TDDFT/CPCM.

|    |    |            |           |           |    |   |           |           |           |
|----|----|------------|-----------|-----------|----|---|-----------|-----------|-----------|
| 1  | C  | -0.649387  | 0.018154  | -0.006554 | 61 | H | 2.760912  | -0.580026 | -2.692877 |
| 2  | C  | -2.864689  | -0.859284 | 0.011187  | 62 | C | 6.517677  | -1.129836 | -1.674490 |
| 3  | C  | -3.361619  | 0.448566  | -0.015090 | 63 | C | 4.804182  | -0.732882 | 3.437530  |
| 4  | C  | -2.483673  | 1.550522  | -0.036975 | 64 | H | 2.774461  | -0.441487 | 2.736146  |
| 5  | C  | -1.106028  | 1.333391  | -0.028222 | 65 | C | 6.526074  | -1.041282 | 1.727188  |
| 6  | H  | -3.578812  | -1.673604 | 0.069133  | 66 | C | 6.121435  | -1.103632 | -3.024038 |
| 7  | H  | -2.888079  | 2.557249  | -0.088953 | 67 | H | 4.517153  | -0.893247 | -4.440446 |
| 8  | C  | -0.011458  | 2.315811  | -0.046791 | 68 | H | 7.560733  | -1.282091 | -1.415095 |
| 9  | C  | -0.139610  | 3.698541  | -0.076570 | 69 | C | 6.136738  | -0.945486 | 3.075537  |
| 10 | C  | 1.290790   | 1.747427  | -0.030267 | 70 | H | 4.539247  | -0.663113 | 4.486993  |
| 11 | C  | 0.992433   | 4.518020  | -0.090321 | 71 | H | 7.567935  | -1.205849 | 1.470544  |
| 12 | H  | -1.126688  | 4.154672  | -0.089403 | 72 | H | 6.871176  | -1.237202 | -3.797111 |
| 13 | C  | 2.401810   | 2.576410  | -0.044168 | 73 | H | 6.890418  | -1.038441 | 3.850726  |
| 14 | C  | 2.279282   | 3.980880  | -0.074492 | 74 | N | 3.393413  | -0.613397 | 0.021585  |
| 15 | H  | 0.850392   | 5.593158  | -0.113827 | 75 | C | -0.788186 | -2.384814 | 0.032346  |
| 16 | H  | 3.394188   | 2.133502  | -0.031023 | 76 | C | -1.330136 | -3.679005 | 0.030230  |
| 17 | C  | -4.825450  | 0.674558  | -0.015731 | 77 | C | -0.519694 | -4.837215 | 0.056936  |
| 18 | C  | -5.396888  | 1.737605  | 0.697510  | 78 | C | 1.391561  | -3.384125 | 0.078857  |
| 19 | C  | -5.692539  | -0.160231 | -0.727436 | 79 | C | 0.899099  | -4.657069 | 0.085492  |
| 20 | C  | -6.768943  | 1.947685  | 0.695869  | 80 | C | -1.276834 | -6.037066 | 0.046326  |
| 21 | H  | -4.757154  | 2.393672  | 1.281860  | 81 | C | -2.625929 | -5.825762 | 0.010826  |
| 22 | C  | -7.068574  | 0.053804  | -0.724284 | 82 | H | 2.461385  | -3.205085 | 0.095802  |
| 23 | H  | -5.284027  | -0.979378 | -1.313401 | 83 | H | 1.573333  | -5.505252 | 0.108943  |
| 24 | C  | -7.642742  | 1.111986  | -0.014238 | 84 | H | -0.829705 | -7.024991 | 0.064530  |
| 25 | H  | -7.166244  | 2.779643  | 1.271891  | 85 | H | -3.424294 | -6.553955 | -0.002339 |
| 26 | H  | -7.694775  | -0.620053 | -1.299553 | 86 | C | -1.477440 | -1.118646 | 0.009038  |
| 27 | Au | 1.278521   | -0.287583 | 0.010893  | 87 | S | -3.015390 | -4.132472 | -0.011764 |
| 28 | C  | -9.149101  | 1.378692  | 0.013700  | 88 | N | 0.616928  | -2.270141 | 0.052200  |
| 29 | C  | -9.932905  | 0.366283  | -0.825741 |    |   |           |           |           |
| 30 | H  | -9.797840  | -0.656940 | -0.459628 |    |   |           |           |           |
| 31 | H  | -11.001867 | 0.597709  | -0.774954 |    |   |           |           |           |
| 32 | H  | -9.637139  | 0.396270  | -1.879758 |    |   |           |           |           |
| 33 | C  | -9.653889  | 1.295371  | 1.463828  |    |   |           |           |           |
| 34 | H  | -9.157600  | 2.026811  | 2.108835  |    |   |           |           |           |
| 35 | H  | -10.731390 | 1.492002  | 1.502296  |    |   |           |           |           |
| 36 | H  | -9.473552  | 0.300267  | 1.883513  |    |   |           |           |           |
| 37 | C  | -9.429614  | 2.784702  | -0.541761 |    |   |           |           |           |
| 38 | H  | -8.927279  | 3.560386  | 0.044149  |    |   |           |           |           |
| 39 | H  | -9.086421  | 2.870954  | -1.577974 |    |   |           |           |           |
| 40 | H  | -10.505295 | 2.993430  | -0.520029 |    |   |           |           |           |
| 41 | C  | 3.542448   | 4.845504  | -0.087782 |    |   |           |           |           |
| 42 | C  | 4.381029   | 4.506662  | -1.331522 |    |   |           |           |           |
| 43 | H  | 5.292905   | 5.114380  | -1.351628 |    |   |           |           |           |
| 44 | H  | 4.680690   | 3.454203  | -1.345439 |    |   |           |           |           |
| 45 | H  | 3.817170   | 4.707813  | -2.248370 |    |   |           |           |           |
| 46 | C  | 3.220934   | 6.342096  | -0.121476 |    |   |           |           |           |
| 47 | H  | 2.654174   | 6.615888  | -1.017569 |    |   |           |           |           |
| 48 | H  | 2.646865   | 6.654238  | 0.757254  |    |   |           |           |           |
| 49 | H  | 4.152732   | 6.917063  | -0.130045 |    |   |           |           |           |
| 50 | C  | 4.369982   | 4.560724  | 1.176738  |    |   |           |           |           |
| 51 | H  | 3.798254   | 4.801493  | 2.079060  |    |   |           |           |           |
| 52 | H  | 4.668806   | 3.509765  | 1.238751  |    |   |           |           |           |
| 53 | H  | 5.282006   | 5.168560  | 1.178529  |    |   |           |           |           |
| 54 | C  | 4.193171   | -0.761769 | -1.079755 |    |   |           |           |           |
| 55 | C  | 4.198087   | -0.705292 | 1.125730  |    |   |           |           |           |
| 56 | C  | 3.800664   | -0.734334 | -2.424085 |    |   |           |           |           |
| 57 | C  | 5.552794   | -0.958398 | -0.702841 |    |   |           |           |           |
| 58 | C  | 3.812526   | -0.608913 | 2.468839  |    |   |           |           |           |
| 59 | C  | 5.556087   | -0.920935 | 0.752950  |    |   |           |           |           |
| 60 | C  | 4.787177   | -0.908929 | -3.390088 |    |   |           |           |           |

**Table S15.** Cartesian coordinates of the optimized T<sub>1</sub> geometry of **1** computed by TDDFT/CPCM.

|    |    |            |           |           |    |   |           |           |           |
|----|----|------------|-----------|-----------|----|---|-----------|-----------|-----------|
| 1  | C  | -0.649009  | 0.017633  | -0.007654 | 61 | H | 2.765445  | -0.562862 | -2.694015 |
| 2  | C  | -2.864672  | -0.859257 | 0.010583  | 62 | C | 6.520633  | -1.115348 | -1.671499 |
| 3  | C  | -3.361375  | 0.448674  | -0.014858 | 63 | C | 4.796593  | -0.756644 | 3.439681  |
| 4  | C  | -2.483145  | 1.550410  | -0.036433 | 64 | H | 2.767874  | -0.462418 | 2.736294  |
| 5  | C  | -1.105602  | 1.332977  | -0.028067 | 65 | C | 6.522037  | -1.051296 | 1.730566  |
| 6  | H  | -3.578908  | -1.673461 | 0.068800  | 66 | C | 6.127345  | -1.079769 | -3.021612 |
| 7  | H  | -2.887331  | 2.557263  | -0.087742 | 67 | H | 4.525778  | -0.860981 | -4.439830 |
| 8  | C  | -0.010962  | 2.315260  | -0.045661 | 68 | H | 7.563289  | -1.268212 | -1.410856 |
| 9  | C  | -0.138939  | 3.698034  | -0.074558 | 69 | C | 6.130056  | -0.965392 | 3.078744  |
| 10 | C  | 1.291195   | 1.746786  | -0.029013 | 70 | H | 4.529589  | -0.694468 | 4.489098  |
| 11 | C  | 0.993168   | 4.517410  | -0.087399 | 71 | H | 7.564549  | -1.213021 | 1.474760  |
| 12 | H  | -1.125975  | 4.154248  | -0.087416 | 72 | H | 6.878888  | -1.206802 | -3.794041 |
| 13 | C  | 2.402364   | 2.575640  | -0.041882 | 73 | H | 6.882351  | -1.063055 | 3.854704  |
| 14 | C  | 2.279954   | 3.980125  | -0.071431 | 74 | N | 3.392065  | -0.615026 | 0.021888  |
| 15 | H  | 0.851240   | 5.592574  | -0.110303 | 75 | C | -0.788645 | -2.385256 | 0.029477  |
| 16 | H  | 3.394707   | 2.132716  | -0.028556 | 76 | C | -1.330985 | -3.679249 | 0.024342  |
| 17 | C  | -4.825145  | 0.675018  | -0.014822 | 77 | C | -0.520941 | -4.837771 | 0.049092  |
| 18 | C  | -5.396054  | 1.737917  | 0.699065  | 78 | C | 1.390837  | -3.385380 | 0.074934  |
| 19 | C  | -5.692702  | -0.159255 | -0.726562 | 79 | C | 0.897816  | -4.658036 | 0.078712  |
| 20 | C  | -6.768052  | 1.948366  | 0.697979  | 80 | C | -1.278421 | -6.037411 | 0.035394  |
| 21 | H  | -4.755953  | 2.393572  | 1.283476  | 81 | C | -2.627379 | -5.825621 | -0.000530 |
| 22 | C  | -7.068678  | 0.055149  | -0.722850 | 82 | H | 2.460694  | -3.206804 | 0.092703  |
| 23 | H  | -5.284608  | -0.978273 | -1.313000 | 83 | H | 1.571803  | -5.506473 | 0.100761  |
| 24 | C  | -7.642316  | 1.113198  | -0.012180 | 84 | H | -0.831585 | -7.025502 | 0.051791  |
| 25 | H  | -7.164931  | 2.780201  | 1.274470  | 85 | H | -3.425956 | -6.553545 | -0.015673 |
| 26 | H  | -7.695259  | -0.618305 | -1.298179 | 86 | C | -1.477489 | -1.118855 | 0.007552  |
| 27 | Au | 1.279044   | -0.288332 | 0.010375  | 87 | S | -3.016361 | -4.132138 | -0.019948 |
| 28 | C  | -9.148584  | 1.380349  | 0.016308  | 88 | N | 0.616440  | -2.270930 | 0.050586  |
| 29 | C  | -9.932924  | 0.368587  | -0.823412 |    |   |           |           |           |
| 30 | H  | -9.798023  | -0.654861 | -0.457866 |    |   |           |           |           |
| 31 | H  | -11.001806 | 0.600280  | -0.772177 |    |   |           |           |           |
| 32 | H  | -9.637477  | 0.399036  | -1.877504 |    |   |           |           |           |
| 33 | C  | -9.653014  | 1.296490  | 1.466530  |    |   |           |           |           |
| 34 | H  | -9.156347  | 2.027479  | 2.111756  |    |   |           |           |           |
| 35 | H  | -10.730447 | 1.493420  | 1.505369  |    |   |           |           |           |
| 36 | H  | -9.472863  | 0.301133  | 1.885697  |    |   |           |           |           |
| 37 | C  | -9.428800  | 2.786716  | -0.538402 |    |   |           |           |           |
| 38 | H  | -8.926041  | 3.561955  | 0.047737  |    |   |           |           |           |
| 39 | H  | -9.085876  | 2.873354  | -1.574672 |    |   |           |           |           |
| 40 | H  | -10.504406 | 2.995784  | -0.516260 |    |   |           |           |           |
| 41 | C  | 3.543237   | 4.844600  | -0.083840 |    |   |           |           |           |
| 42 | C  | 4.382115   | 4.506350  | -1.327546 |    |   |           |           |           |
| 43 | H  | 5.294110   | 5.113910  | -1.347014 |    |   |           |           |           |
| 44 | H  | 4.681579   | 3.453841  | -1.342024 |    |   |           |           |           |
| 45 | H  | 3.818558   | 4.708175  | -2.244433 |    |   |           |           |           |
| 46 | C  | 3.221906   | 6.341249  | -0.116776 |    |   |           |           |           |
| 47 | H  | 2.655451   | 6.615625  | -1.012882 |    |   |           |           |           |
| 48 | H  | 2.647619   | 6.652959  | 0.761964  |    |   |           |           |           |
| 49 | H  | 4.153778   | 6.916102  | -0.124739 |    |   |           |           |           |
| 50 | C  | 4.370387   | 4.559003  | 1.180744  |    |   |           |           |           |
| 51 | H  | 3.798419   | 4.799245  | 2.083053  |    |   |           |           |           |
| 52 | H  | 4.669166   | 3.508000  | 1.242202  |    |   |           |           |           |
| 53 | H  | 5.282434   | 5.166800  | 1.183158  |    |   |           |           |           |
| 54 | C  | 4.194400   | -0.754447 | -1.079061 |    |   |           |           |           |
| 55 | C  | 4.194914   | -0.713557 | 1.127022  |    |   |           |           |           |
| 56 | C  | 3.804792   | -0.717757 | -2.423910 |    |   |           |           |           |
| 57 | C  | 5.553370   | -0.952108 | -0.700733 |    |   |           |           |           |
| 58 | C  | 3.806685   | -0.626921 | 2.469969  |    |   |           |           |           |
| 59 | C  | 5.553765   | -0.925011 | 0.755311  |    |   |           |           |           |
| 60 | C  | 4.793632   | -0.884018 | -3.389048 |    |   |           |           |           |

## OLED Fabrication and Characterization

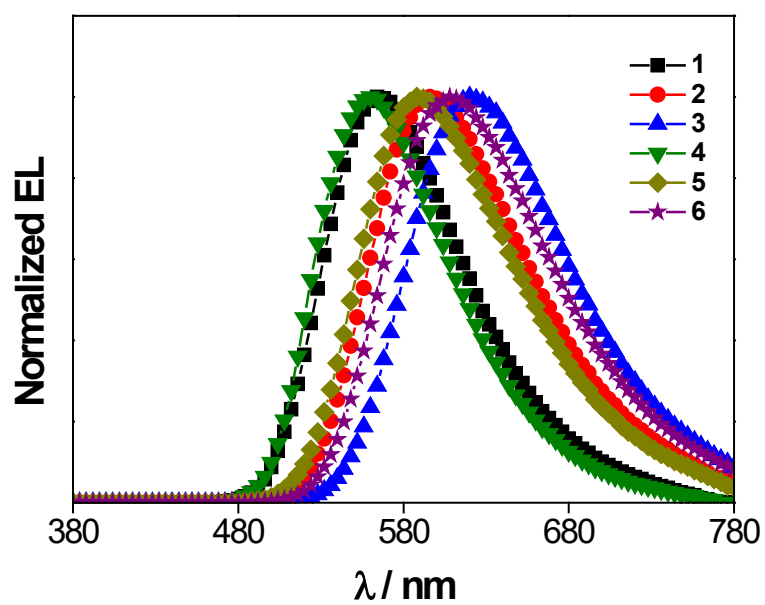

*Figure S26.* Normalized EL spectra of the solution-processed devices based on **1–6**.

**Table S16.** Key parameters of solution-processed devices based on **1–6**.

| Complex  | Conc.<br>/ wt% | CE <sup>a</sup><br>/ cd A <sup>-1</sup> | PE <sup>b</sup><br>/ lm W <sup>-1</sup> | EQE <sup>c</sup><br>/ % | $\lambda_{\max}^d$<br>/ nm | CIE <sup>e</sup> (x, y) |
|----------|----------------|-----------------------------------------|-----------------------------------------|-------------------------|----------------------------|-------------------------|
| <b>1</b> | 5              | 12.6                                    | 2.6                                     | 3.7                     | 544                        | 0.39, 0.57              |
|          | 10             | 25.2                                    | 7.4                                     | 7.9                     | 560                        | 0.44, 0.54              |
|          | 15             | 26.1                                    | 9.3                                     | 8.6                     | 564                        | 0.46, 0.52              |
|          | 20             | 22.4                                    | 8.9                                     | 8.0                     | 572                        | 0.49, 0.50              |
| <b>2</b> | 5              | 8.6                                     | 1.7                                     | 3.3                     | 580                        | 0.51, 0.48              |
|          | 10             | 10.8                                    | 2.8                                     | 4.7                     | 588                        | 0.53, 0.46              |
|          | 15             | 9.4                                     | 3.4                                     | 4.7                     | 596                        | 0.55, 0.44              |
|          | 20             | 2.0                                     | 0.6                                     | 1.1                     | 600                        | 0.56, 0.43              |
| <b>3</b> | 5              | 2.7                                     | 0.6                                     | 1.5                     | 608                        | 0.57, 0.43              |
|          | 10             | 3.9                                     | 1.0                                     | 2.4                     | 616                        | 0.59, 0.41              |
|          | 15             | 6.2                                     | 2.3                                     | 4.5                     | 620                        | 0.61, 0.39              |
|          | 20             | 5.8                                     | 2.5                                     | 4.6                     | 628                        | 0.62, 0.38              |
| <b>4</b> | 5              | 13.4                                    | 3.5                                     | 3.9                     | 544                        | 0.39, 0.58              |
|          | 10             | 25.6                                    | 9.9                                     | 7.9                     | 560                        | 0.44, 0.55              |
|          | 15             | 27.0                                    | 10.6                                    | 8.5                     | 560                        | 0.45, 0.54              |
|          | 20             | 25.9                                    | 11.4                                    | 8.4                     | 564                        | 0.46, 0.53              |
| <b>5</b> | 5              | 9.1                                     | 1.8                                     | 3.2                     | 572                        | 0.48, 0.51              |
|          | 10             | 12.2                                    | 3.7                                     | 4.8                     | 580                        | 0.51, 0.48              |
|          | 15             | 11.8                                    | 4.4                                     | 5.2                     | 588                        | 0.54, 0.46              |
|          | 20             | 9.6                                     | 4.1                                     | 4.6                     | 596                        | 0.55, 0.45              |
| <b>6</b> | 5              | 8.9                                     | 2.1                                     | 3.8                     | 588                        | 0.53, 0.46              |
|          | 10             | 12.0                                    | 3.6                                     | 6.2                     | 600                        | 0.56, 0.44              |
|          | 15             | 10.1                                    | 3.8                                     | 6.0                     | 608                        | 0.58, 0.42              |
|          | 20             | 9.2                                     | 4.0                                     | 5.9                     | 612                        | 0.59, 0.41              |

<sup>a</sup> CE represents maximum current efficiency.

<sup>b</sup> PE represents maximum power efficiency.

<sup>c</sup> EQE represents maximum external quantum efficiency.

<sup>d</sup>  $\lambda_{\max}$  represents peak maximum.

<sup>e</sup> CIE coordinates are taken at a current density of 100 cd m<sup>-2</sup>.

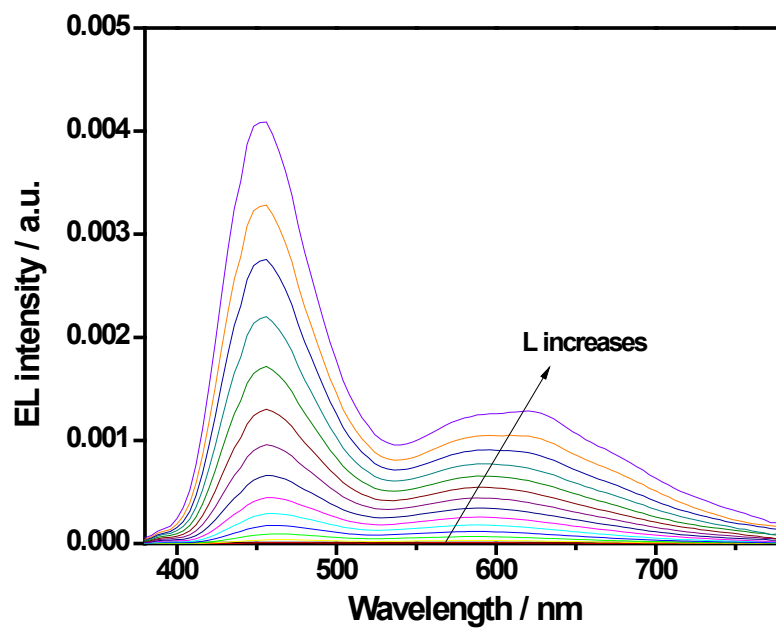

*Figure S27.* EL spectra of vacuum-deposited devices based on **6**.

**Table S17.** Key parameters of vacuum-deposited devices based on **1–5**.

| Complex  | Conc.<br>/ % v/v | CE <sup>a</sup><br>/ cd A <sup>-1</sup> | PE <sup>b</sup><br>/ lm W <sup>-1</sup> | EQE <sup>c</sup><br>/ % | $\lambda_{\max}^d$<br>/ nm | CIE <sup>e</sup> (x, y) |
|----------|------------------|-----------------------------------------|-----------------------------------------|-------------------------|----------------------------|-------------------------|
| <b>1</b> | 2                | 35.1                                    | 31.5                                    | 12.0                    | 560                        | 0.44, 0.53              |
|          | 5                | 36.3                                    | 32.6                                    | 13.5                    | 572                        | 0.47, 0.51              |
|          | 8                | 36.5                                    | 35.8                                    | 14.3                    | 576                        | 0.49, 0.50              |
|          | 11               | 33.9                                    | 33.0                                    | 13.8                    | 580                        | 0.50, 0.49              |
|          | 14               | 31.2                                    | 31.8                                    | 13.7                    | 588                        | 0.52, 0.47              |
| <b>2</b> | 2                | 11.6                                    | 10.4                                    | 6.3                     | 600                        | 0.54, 0.45              |
|          | 5                | 11.6                                    | 10.4                                    | 6.8                     | 608                        | 0.56, 0.44              |
|          | 8                | 10.5                                    | 9.5                                     | 7.1                     | 612                        | 0.57, 0.43              |
|          | 11               | 9.5                                     | 8.5                                     | 7.0                     | 620                        | 0.58, 0.41              |
|          | 14               | 8.7                                     | 7.5                                     | 6.4                     | 620                        | 0.59, 0.41              |
| <b>3</b> | 2                | 11.2                                    | 10.1                                    | 7.6                     | 620                        | 0.58, 0.41              |
|          | 5                | 9.2                                     | 8.2                                     | 8.2                     | 628                        | 0.60, 0.40              |
|          | 8                | 7.5                                     | 6.7                                     | 7.3                     | 636                        | 0.61, 0.39              |
|          | 11               | 6.5                                     | 5.7                                     | 6.9                     | 636                        | 0.62, 0.38              |
| <b>4</b> | 2                | 38.1                                    | 34.2                                    | 12.6                    | 556                        | 0.43, 0.54              |
|          | 5                | 41.6                                    | 37.3                                    | 14.3                    | 564                        | 0.45, 0.53              |
|          | 8                | 40.4                                    | 36.2                                    | 14.4                    | 564                        | 0.46, 0.53              |
|          | 11               | 38.3                                    | 36.3                                    | 14.5                    | 568                        | 0.47, 0.52              |
|          | 14               | 34.9                                    | 33.2                                    | 13.5                    | 572                        | 0.48, 0.51              |
| <b>5</b> | 2                | 15.2                                    | 11.9                                    | 6.5                     | 588                        | 0.51, 0.48              |
|          | 5                | 17.8                                    | 16.0                                    | 8.5                     | 588                        | 0.52, 0.47              |
|          | 8                | 17.2                                    | 15.4                                    | 8.3                     | 596                        | 0.53, 0.46              |
|          | 11               | 16.1                                    | 14.4                                    | 8.7                     | 600                        | 0.54, 0.45              |
|          | 14               | 14.5                                    | 13.0                                    | 8.2                     | 600                        | 0.54, 0.45              |

<sup>a</sup> CE represents maximum current efficiency.

<sup>b</sup> PE represents maximum power efficiency.

<sup>c</sup> EQE represents maximum external quantum efficiency.

<sup>d</sup>  $\lambda_{\max}$  represents peak maximum.

<sup>e</sup> CIE coordinates are taken at a current density of 100 cd m<sup>-2</sup>.

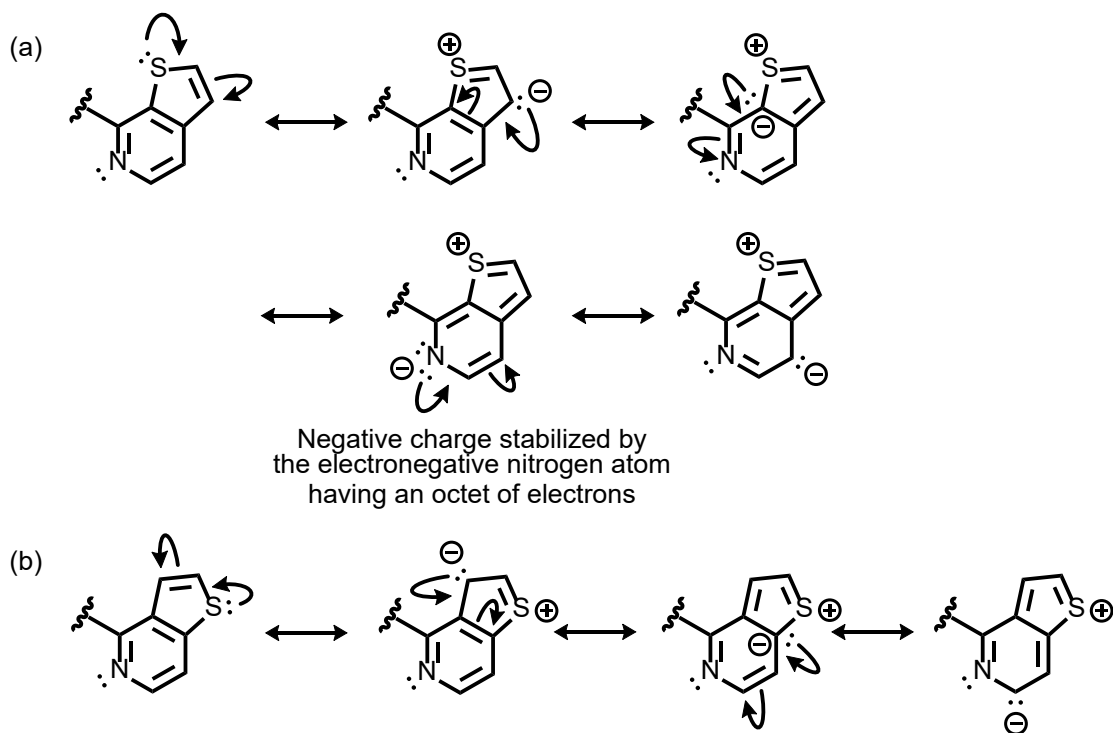

**Figure S28.** Resonance structures of thieno[2,3-*c*]pyridine (1-thpy) and thieno[3,2-*c*]pyridine (2-thpy) moieties in the cyclometalating ligands.

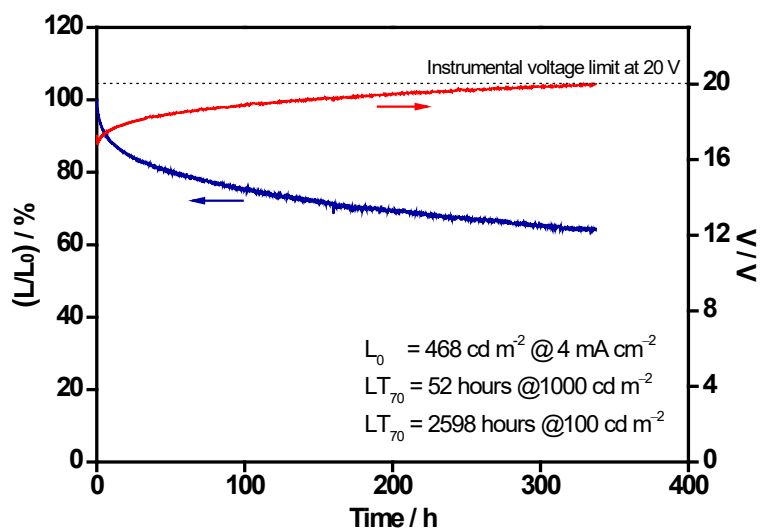

**Figure S29.** Relative luminance,  $L/L_0$ , and driving voltage of the solution-processed device based on **1** as a function of operation projected at an initial luminance of  $100 \text{ cd cm}^{-2}$ .



**Table S18.** Lifetime data of devices based on **1–5**.

| Complex                   | $L_0^a$<br>/ $\text{cd m}^{-2}$ | Lifetime / h                |                                                  |                                                |
|---------------------------|---------------------------------|-----------------------------|--------------------------------------------------|------------------------------------------------|
|                           |                                 | $\text{LT}_{70}^b$ at $L_0$ | $\text{LT}_{70}$ at<br>$1,000 \text{ cd m}^{-2}$ | $\text{LT}_{70}$ at<br>$100 \text{ cd m}^{-2}$ |
| Vacuum-deposited devices  |                                 |                             |                                                  |                                                |
| <b>1</b>                  | 4,869                           | 85.6                        | 1,262                                            | 63,258                                         |
| <b>2</b>                  | 1,291                           | 203.7                       | 314                                              | 15,760                                         |
| <b>3</b>                  | 993                             | 680                         | 672                                              | 33,676                                         |
| <b>4</b>                  | 3,534                           | 0.2                         | 2                                                | 86                                             |
| <b>5</b>                  | 1,596                           | 0.5                         | 1                                                | 55                                             |
| Solution-processed device |                                 |                             |                                                  |                                                |
| <b>1</b>                  | 468                             | 188                         | 52                                               | 2,598                                          |

<sup>a</sup>  $L_0$  is defined as the initial luminance.

<sup>b</sup>  $\text{LT}_{70}$  is defined as the operational lifetime at 70 % of the initial luminance.

**Materials and reagents.** Potassium tetrachloroaurate(III) and sodium hydride were purchased from Strem Chemicals, Inc. Carbazole was purchased from Sigma-Aldrich. 3,6-Di-*tert*-butylcarbazole was purchased from Alfa Aesar. All solvents for synthesis were purified by the Pure Solv MD System (Multiple Dispensing System, Innovative Technology) before use. All other reagents were of analytical grade and were used as received. Tetra-*n*-butylammonium hexafluorophosphate (Aldrich, 98 %) was recrystallized for no less than three times from hot absolute ethanol prior to use. All reactions were performed under anaerobic and anhydrous conditions using standard Schlenk techniques under an inert atmosphere of nitrogen.

**Physical measurements and instrumentation.** The UV–vis absorption spectra were recorded on a Cary 60 UV–vis (Agilent Technology) spectrophotometer equipped with a Xenon flash lamp.  $^1\text{H}$  and  $^{13}\text{C}\{^1\text{H}\}$  NMR spectra were recorded on a Bruker AVANCE 400 (400 MHz for  $^1\text{H}$  nucleus) or Bruker AVANCE 500 (500 MHz for  $^1\text{H}$  and 125 MHz for  $^{13}\text{C}$  nuclei) Fourier-transform NMR spectrometer with chemical shifts reported relative to tetramethylsilane ( $\delta = 0$  ppm) in deuterated chloroform. High-resolution ESI and CSI mass spectra were recorded on Bruker maXis II<sup>TM</sup> High Resolution LC-QTOF Mass Spectrometer. Elemental analyses were performed on the Carlo Erba 1106 elemental analyzer at the Institute of Chemistry, Chinese Academy of Sciences in Beijing. Steady-state excitation and emission spectra were recorded on a Horiba Scientific FluoroMax-4 fluorescence spectrofluorometer equipped with a R928P PMT detector. Liquid nitrogen was placed into the quartz-walled optical Dewar flask for low temperature (77 K) photophysical measurements. Solid-state photophysical measurements were performed with solid sample loaded into a quartz tube inside a quartz-walled Dewar flask. Low temperature (77 K) photophysical measurements were done by placing liquid nitrogen into the optical Dewar flask. Excited-state lifetimes of solution and glass samples were measured with a conventional nanosecond pulsed laser system. The excitation source used was the 355 nm output (third harmonic, 8 ns) of a Spectra-Physics Quanta-Ray Q-switched GCR-150 pulsed Nd:YAG laser (10 Hz). Luminescence decay signals were recorded by a Hamamatsu R928 photomultiplier tube, recorded on a Tektronix model TDS-620A (500 MHz, 2 GSs<sup>-1</sup>) digital oscilloscope, and analyzed with a program for exponential fits. Time-resolved emission spectra were obtained using an Edinburgh Instrument LP980KS transient absorption spectrometer equipped with R928P photomultiplier tube, with capability for time-resolved emission

measurements. Relative photoluminescence quantum yields in solution were measured by the optical dilute method reported by Demas and Crosby.<sup>12</sup> A solution of quinine sulfate in 0.5 M H<sub>2</sub>SO<sub>4</sub> has been used as reference ( $\Phi = 0.546$ , excitation wavelength at 365 nm),<sup>12</sup> whereas absolute PLQYs in thin films were measured on a Hamamatsu C9920–03 absolute PLQY measurement system. Excited-state lifetimes of thin films were measured on a Quantaaurus-Tau C11367–34 fluorescence lifetime spectrometer. Cyclic voltammetry was performed with a CH Instruments Model CHI620E (CH Instruments, Inc.). All solutions for electrochemical measurements were purged with prepurified argon gas prior to measurement. Thermal analyses were performed on a TGA Q50 (TA Instruments), in which  $T_d$  is defined as the temperature at which the sample shows a 5 % weight loss.

**Synthesis.** The cyclometalating ligands incorporated with thienopyridine moieties, 4-<sup>t</sup>BuC<sup>^</sup>C(4-<sup>t</sup>BuC<sub>6</sub>H<sub>4</sub>)<sup>^</sup>N<sub>(1-thpy)</sub> and 4-<sup>t</sup>BuC<sup>^</sup>C(4-<sup>t</sup>BuC<sub>6</sub>H<sub>4</sub>)<sup>^</sup>N<sub>(2-thpy)</sub>,<sup>13,14</sup> and those with the thienoquinoline moieties, 4-<sup>t</sup>BuC<sup>^</sup>C(4-<sup>t</sup>BuC<sub>6</sub>H<sub>4</sub>)<sup>^</sup>N<sub>(1-thq)</sub> and 4-<sup>t</sup>BuC<sup>^</sup>C(4-<sup>t</sup>BuC<sub>6</sub>H<sub>4</sub>)<sup>^</sup>N<sub>(2-thq)</sub>,<sup>15</sup> were synthesized by slight modifications of the literature procedures. The resulting ligands were then mercurated and transmetalated to gold(III) metal center to afford the cyclometalated chlorogold(III) precursor complexes, [Au{4-<sup>t</sup>BuC<sup>^</sup>C(4-<sup>t</sup>BuC<sub>6</sub>H<sub>4</sub>)<sup>^</sup>N<sub>(1-thpy)</sub>}Cl], [Au{4-<sup>t</sup>BuC<sup>^</sup>C(4-<sup>t</sup>BuC<sub>6</sub>H<sub>4</sub>)<sup>^</sup>N<sub>(2-thpy)</sub>}Cl], [Au{4-<sup>t</sup>BuC<sup>^</sup>C(4-<sup>t</sup>BuC<sub>6</sub>H<sub>4</sub>)<sup>^</sup>N<sub>(1-thq)</sub>}Cl] and [Au{4-<sup>t</sup>BuC<sup>^</sup>C(4-<sup>t</sup>BuC<sub>6</sub>H<sub>4</sub>)<sup>^</sup>N<sub>(2-thq)</sub>}Cl], which were prepared according to modification of the previously reported literature procedures.<sup>13,14</sup> The carbazolylgold(III) complexes were then synthesized by reacting carbazole or 3,6-di-*tert*-butylcarbazole with the corresponding chlorogold(III) precursors with sodium hydride in degassed tetrahydrofuran.<sup>14,16</sup>

#### 4-<sup>t</sup>BuC<sup>^</sup>C(4-<sup>t</sup>BuC<sub>6</sub>H<sub>4</sub>)<sup>^</sup>N<sub>(1-thq)</sub>

Off-white solid. Yield: 609 mg, 45 %. <sup>1</sup>H NMR (400 MHz, CDCl<sub>3</sub>, 298 K, relative to Me<sub>4</sub>Si,  $\delta$ /ppm):  $\delta$  8.35–8.31 (m, 4H, thienoquinolinyl protons and phenyl protons), 8.10–8.09 (d,  $J = 5.4$  Hz, 1H, thienoquinolinyl proton), 7.98–7.97 (m, 1H, phenyl proton), 7.91–7.90 (d,  $J = 5.4$  Hz, 1H, thienoquinolinyl proton), 7.78–7.76 (m, 1H, thienoquinolinyl proton), 7.74–7.70 (d,  $J = 8.4$  Hz, 4H, phenyl protons), 7.70–7.65 (m, 1H, thienoquinolinyl proton), 7.54–7.51 (d,  $J = 8.4$  Hz, 4H, phenyl protons), 1.39 (s, 18H, -<sup>t</sup>Bu). HRMS (Positive ESI): Found  $m/z$  524.2592 [M]<sup>+</sup>. Calcd for C<sub>38</sub>H<sub>36</sub>S [M]<sup>+</sup>:

$m/z$  524.2538.

**4-<sup>t</sup>BuC<sup>^</sup>C(4-<sup>t</sup>BuC<sub>6</sub>H<sub>4</sub>)<sup>^</sup>N(2-thq)**

Pale yellow solid. Yield: 707 mg, 49 %. <sup>1</sup>H NMR (400 MHz, CDCl<sub>3</sub>, 298 K, relative to Me<sub>4</sub>Si,  $\delta$ /ppm):  $\delta$  8.30–8.28 (d,  $J$  = 8.4 Hz, 1H, thienoquinolinyl proton), 8.18–8.16 (d,  $J$  = 8.1 Hz, 1H, thienoquinolinyl proton), 8.08 (d,  $J$  = 1.7 Hz, 2H, phenyl protons), 7.95 (m, 1H, phenyl proton), 7.77–7.72 (m, 2H, thienoquinolinyl protons), 7.69–7.67 (d,  $J$  = 8.4 Hz, 4H, phenyl protons), 7.66–7.62 (m, 1H, thienoquinolinyl proton), 7.57–7.56 (d,  $J$  = 5.4 Hz, 1H, thienoquinolinyl proton), 7.52–7.50 (d,  $J$  = 8.4 Hz, 4H, phenyl protons), 1.38 (s, 18H, -<sup>t</sup>Bu). HRMS (Positive ESI): Found  $m/z$  524.2585 [M]<sup>+</sup>. Calcd for C<sub>38</sub>H<sub>36</sub>S [M]<sup>+</sup>:  $m/z$  524.2538.

**[Au{4-<sup>t</sup>BuC<sup>^</sup>C(4-<sup>t</sup>BuC<sub>6</sub>H<sub>4</sub>)<sup>^</sup>N(1-thpy)}Cl]**

Yellow solid. Yield: 308 mg, 78 %. <sup>1</sup>H NMR (400 MHz, CDCl<sub>3</sub>, 298 K, relative to Me<sub>4</sub>Si,  $\delta$ /ppm):  $\delta$  9.15–9.14 (d,  $J$  = 6.0 Hz, 1H, thienopyridyl proton), 8.03–8.02 (d,  $J$  = 5.4 Hz, 1H, thienopyridyl proton), 8.00 (d,  $J$  = 1.9 Hz, 1H, phenyl proton), 7.97 (d,  $J$  = 1.5 Hz, 1H, phenyl proton), 7.88–7.86 (d,  $J$  = 6.0 Hz, 1H, thienopyridyl proton), 7.66–7.64 (d,  $J$  = 8.5 Hz, 2H, phenyl protons), 7.56–7.55 (d,  $J$  = 8.5 Hz, 2H, phenyl protons), 7.53–7.52 (m, 2H, thienopyridyl proton and phenyl proton), 7.32–7.30 (d,  $J$  = 8.0 Hz, 1H, phenyl proton), 7.25–7.24 (m, 1H, phenyl proton), 1.41 (s, 9H, -<sup>t</sup>Bu), 1.38 (s, 9H, -<sup>t</sup>Bu). HRMS (Positive ESI): Found  $m/z$  711.2125 [M-Cl+CH<sub>3</sub>CN]<sup>+</sup>. Calcd for AuC<sub>35</sub>H<sub>34</sub>N<sub>2</sub>S [M-Cl+CH<sub>3</sub>CN]<sup>+</sup>:  $m/z$  711.2102.

**[Au{4-<sup>t</sup>BuC<sup>^</sup>C(4-<sup>t</sup>BuC<sub>6</sub>H<sub>4</sub>)<sup>^</sup>N(2-thpy)}Cl]**

Yellow solid. Yield: 219 mg, 71 %. <sup>1</sup>H NMR (500 MHz, CDCl<sub>3</sub>, 298 K, relative to Me<sub>4</sub>Si,  $\delta$ /ppm):  $\delta$  9.09–9.08 (d,  $J$  = 6.1 Hz, 1H, thienopyridyl proton), 8.25–8.24 (d,  $J$  = 5.7 Hz, 1H, thienopyridyl proton), 7.98–7.97 (m, 2H, phenyl protons), 7.94–7.93 (d,  $J$  = 6.1 Hz, 1H, thienopyridyl proton), 7.83–7.82 (d,  $J$  = 5.7 Hz, 1H, thienopyridyl proton), 7.64–7.62 (d,  $J$  = 8.4 Hz, 2H, phenyl protons), 7.56–7.55 (d,  $J$  = 8.4 Hz, 2H, phenyl protons), 7.47–7.46 (d,  $J$  = 1.4 Hz, 1H, phenyl proton), 7.30–7.28 (d,  $J$  = 8.0 Hz, 1H, phenyl proton), 7.25–7.23 (m, 1H, phenyl proton), 1.41 (s, 9H, -<sup>t</sup>Bu), 1.36 (s, 9H, -<sup>t</sup>Bu). HRMS (Positive ESI): Found  $m/z$  711.2089 [M-Cl+CH<sub>3</sub>CN]<sup>+</sup>. Calcd for AuC<sub>35</sub>H<sub>34</sub>N<sub>2</sub>S [M-Cl+CH<sub>3</sub>CN]<sup>+</sup>:  $m/z$  711.2102.

**[Au{4-<sup>t</sup>BuC<sup>4</sup>C(4-<sup>t</sup>BuC<sub>6</sub>H<sub>4</sub>)<sup>N</sup>(1-thq)}Cl]**

Yellow solid. Yield: 303 mg, 65 %. <sup>1</sup>H NMR (500 MHz, CDCl<sub>3</sub>, 298 K, relative to Me<sub>4</sub>Si, δ/ppm): δ 10.0–9.99 (d, *J* = 8.8 Hz, 1H, thienoquinolinylyl proton), 8.24 (d, *J* = 1.6 Hz, 1H, phenyl proton), 8.18 (s, 1H, phenyl proton), 8.15–8.14 (d, *J* = 7.9 Hz, 1H, thienoquinolinylyl proton), 8.05–8.04 (d, *J* = 5.4 Hz, 1H, thienoquinolinylyl proton), 7.93–7.92 (d, *J* = 5.4 Hz, 1H, thienoquinolinylyl proton), 7.74–7.71 (m, 1H, thienoquinolinylyl proton), 7.62–7.59 (m, 3H, thienoquinolinylyl proton and phenyl protons), 7.54–7.52 (d, *J* = 8.3 Hz, 2H, phenyl protons), 7.41 (s, 1H, phenyl proton), 7.24–7.23 (d, *J* = 1.6 Hz, 1H, phenyl proton), 7.22–7.21 (d, *J* = 7.9 Hz, 1H, phenyl proton), 1.42 (s, 9H, -<sup>t</sup>Bu), 1.41 (s, 9H, -<sup>t</sup>Bu). HRMS (Positive ESI): Found *m/z* 761.2286 [M-Cl+CH<sub>3</sub>CN]<sup>+</sup>. Calcd for AuC<sub>39</sub>H<sub>36</sub>N<sub>2</sub>S [M-Cl+CH<sub>3</sub>CN]<sup>+</sup>: *m/z* 761.2259.

**[Au{4-<sup>t</sup>BuC<sup>4</sup>C(4-<sup>t</sup>BuC<sub>6</sub>H<sub>4</sub>)<sup>N</sup>(2-thq)}Cl]**

Yellow solid. Yield: 173 mg, 61 %. <sup>1</sup>H NMR (500 MHz, CDCl<sub>3</sub>, 298 K, relative to Me<sub>4</sub>Si, δ/ppm): δ 9.90–9.88 (d, *J* = 8.8 Hz, 1H, thienoquinolinylyl proton), 8.31–8.30 (d, *J* = 5.6 Hz, 1H, thienoquinolinylyl proton), 8.15 (s, 1H, phenyl proton), 8.01–7.99 (m, 2H, thienoquinolinylyl proton and phenyl proton), 7.73–7.71 (m, 1H, thienoquinolinylyl proton), 7.65–7.57 (m, 4H, thienoquinolinylyl protons and phenyl protons), 7.55–7.53 (d, *J* = 8.3 Hz, 2H, phenyl protons), 7.32 (s, 1H, phenyl proton), 7.23–7.18 (m, 2H, phenyl protons), 1.41 (s, 9H, -<sup>t</sup>Bu), 1.35 (s, 9H, -<sup>t</sup>Bu). HRMS (Positive ESI): Found *m/z* 761.2237 [M-Cl+CH<sub>3</sub>CN]<sup>+</sup>. Calcd for AuC<sub>39</sub>H<sub>36</sub>N<sub>2</sub>S [M-Cl+CH<sub>3</sub>CN]<sup>+</sup>: *m/z* 761.2259.

**[Au{4-<sup>t</sup>BuC<sup>4</sup>C(4-<sup>t</sup>BuC<sub>6</sub>H<sub>4</sub>)<sup>N</sup>(1-thpy)}(Cbz)] (1)**

Yellow solid. Yield: 173 mg, 73 %. <sup>1</sup>H NMR (500 MHz, CDCl<sub>3</sub>, 298 K, relative to Me<sub>4</sub>Si, δ/ppm): δ 8.28–8.26 (d, *J* = 7.7 Hz, 2H, carbazolyl protons), 8.14–8.12 (m, 2H, phenyl proton and carbazolyl proton), 8.06–8.05 (d, *J* = 5.4 Hz, 1H, thienopyridyl proton), 7.72–7.70 (m, 2H, thienopyridyl proton and phenyl proton), 7.67–7.65 (m, 3H, phenyl protons and carbazolyl proton), 7.60–7.58 (m, 3H, thienopyridyl proton and phenyl protons), 7.51–7.50 (d, *J* = 5.4 Hz, 1H, thienopyridyl proton), 7.39–7.38 (d, *J* = 8.0 Hz, 1H, phenyl proton), 7.31–7.28 (m, 2H, carbazolyl protons), 7.19–7.17 (dd, *J* = 8.0 and 1.9 Hz, 1H, phenyl proton), 7.14–7.13 (m, 2H, carbazolyl protons), 6.77–6.76 (d, *J* = 1.9 Hz, 1H, phenyl proton), 1.43 (s, 9H, -<sup>t</sup>Bu), 0.91 (s, 9H, -<sup>t</sup>Bu). <sup>13</sup>C{<sup>1</sup>H} NMR (125 MHz, CDCl<sub>3</sub>, 298 K, relative to Me<sub>4</sub>Si, δ/ppm): δ 166.06, 159.96, 151.83, 151.63,

151.50, 151.01, 149.17, 148.33, 148.14, 142.70, 142.00, 141.88, 138.42, 136.45, 132.43, 132.09, 126.97, 126.05, 125.34, 124.78, 124.00, 123.50, 122.96, 121.97, 121.66, 119.96, 118.37, 116.24, 113.76, 67.99, 65.86, 34.72, 34.68, 25.62. HRMS (Positive ESI): Found  $m/z$  836.2475  $[M]^+$ . Calcd for  $\text{AuC}_{45}\text{H}_{39}\text{N}_2\text{S}$   $[M]^+$ :  $m/z$  836.2494. Elemental analyses: Found (%): C 63.27, H 4.71, N 3.35. Calcd for  $\text{C}_{45}\text{H}_{39}\text{AuN}_2\text{S}\cdot\text{H}_2\text{O}$ : C 63.23, H 4.83, N 3.25.

**[Au{4-<sup>t</sup>BuC<sup>^</sup>C(4-<sup>t</sup>BuC<sub>6</sub>H<sub>4</sub>)<sup>^</sup>N(1-thpy)}(<sup>t</sup>Bu<sub>2</sub>Cbz)] (2)**

Orange solid. Yield: 101 mg, 78 %. <sup>1</sup>H NMR (500 MHz, CDCl<sub>3</sub>, 298 K, relative to Me<sub>4</sub>Si,  $\delta$ /ppm):  $\delta$  8.36–8.35 (d,  $J$  = 5.9 Hz, 1H, thienopyridyl proton), 8.24 (d,  $J$  = 1.3 Hz, 2H, carbazolyl protons), 8.13 (s, 1H, phenyl proton), 8.05–8.04 (d,  $J$  = 5.3 Hz, 1H, thienopyridyl proton), 7.71–7.70 (d,  $J$  = 8.2 Hz, 2H, phenyl protons), 7.66–7.64 (m, 2H, thienopyridyl proton and phenyl proton), 7.59–7.57 (d,  $J$  = 8.2 Hz, 2H, phenyl protons), 7.53–7.51 (m, 3H, thienopyridyl proton and carbazolyl protons), 7.36–7.32 (m, 3H, phenyl proton and carbazolyl protons), 7.15–7.13 (dd,  $J$  = 6.4 and 1.5 Hz, 1H, phenyl proton), 6.65 (d,  $J$  = 1.5 Hz, 1H, phenyl proton), 1.47 (s, 18H, -<sup>t</sup>Bu), 1.43 (s, 9H, -<sup>t</sup>Bu), 0.88 (s, 9H, -<sup>t</sup>Bu). <sup>13</sup>C{<sup>1</sup>H} NMR (125 MHz, CDCl<sub>3</sub>, 298 K, relative to Me<sub>4</sub>Si,  $\delta$ /ppm):  $\delta$  166.44, 160.04, 151.81, 151.56, 151.41, 150.94, 149.17, 148.05, 147.01, 142.97, 142.06, 141.77, 138.86, 138.55, 136.33, 132.40, 132.30, 126.98, 126.03, 125.21, 124.59, 123.51, 122.93, 121.93, 121.81, 121.48, 118.37, 115.57, 113.21, 67.98, 65.86, 34.70, 34.68, 34.60, 32.26, 32.03, 31.41, 30.74, 29.73. HRMS (Positive ESI): Found  $m/z$  948.3709  $[M]^+$ . Calcd for  $\text{AuC}_{53}\text{H}_{55}\text{N}_2\text{S}$   $[M]^+$ :  $m/z$  948.3746. Elemental analyses: Found (%): C 65.14, H 5.74, N 2.93. Calcd for  $\text{C}_{53}\text{H}_{55}\text{AuN}_2\text{S}\cdot 1.5\text{H}_2\text{O}$ : C 65.22, H 5.99, N 2.87.

**[Au{4-<sup>t</sup>BuC<sup>^</sup>C(4-<sup>t</sup>BuC<sub>6</sub>H<sub>4</sub>)<sup>^</sup>N(1-thq)}(Cbz)] (3)**

Orange solid. Yield: 201 mg, 74 %. <sup>1</sup>H NMR (400 MHz, CD<sub>2</sub>Cl<sub>2</sub>, 298 K,  $\delta$ /ppm):  $\delta$  8.79–8.77 (d,  $J$  = 8.6 Hz, 1H, thienoquinolinyl proton), 8.45 (d,  $J$  = 1.4 Hz, 1H, phenyl proton), 8.28–8.25 (m, 3H, thienoquinolinyl proton and carbazolyl protons), 8.20–8.19 (d,  $J$  = 5.4 Hz, 1H, thienoquinolinyl proton), 8.12–8.10 (d,  $J$  = 5.5 Hz, 1H, thienoquinolinyl proton), 7.75–7.72 (d,  $J$  = 8.4 Hz, 2H, phenyl protons), 7.68 (d,  $J$  = 1.3 Hz, 1H, phenyl proton), 7.63–7.61 (d,  $J$  = 8.1 Hz, 2H, carbazolyl protons), 7.59–7.56 (d,  $J$  = 8.4 Hz, 2H, phenyl protons), 7.45–7.41 (t,  $J$  = 8.0 Hz, 1H,

thienoquinolinyl proton), 7.32–7.30 (d,  $J = 8.0$  Hz, 1H, phenyl proton), 7.27–7.23 (m, 2H, carbazolyl protons), 7.13–7.05 (m, 3H, phenyl proton and carbazolyl protons), 6.98–6.93 (m, 1H, thienoquinolinyl proton), 5.62 (d,  $J = 1.9$  Hz, 1H, phenyl proton), 1.40 (s, 9H,  $-t$ Bu), 0.70 (s, 9H,  $-t$ Bu).  $^{13}\text{C}\{^1\text{H}\}$  NMR (125 MHz,  $\text{CD}_2\text{Cl}_2$ , 298 K,  $\delta/\text{ppm}$ ):  $\delta$  167.51, 161.88, 152.12, 151.72, 151.57, 151.56, 149.25, 148.92, 147.24, 144.40, 144.09, 142.19, 138.48, 137.08, 130.97, 130.77, 129.86, 128.41, 128.18, 127.34, 126.62, 126.52, 125.31, 124.75, 124.65, 124.56, 123.86, 122.43, 122.29, 122.10, 120.32, 117.15, 114.41, 35.10, 35.03, 31.67, 30.79. HRMS (Positive ESI): Found  $m/z$  886.2673  $[\text{M}]^+$ . Calcd for  $\text{AuC}_{49}\text{H}_{41}\text{N}_2\text{S}$   $[\text{M}]^+$ :  $m/z$  886.2650. Elemental analyses: Found (%): C 63.64, H 4.62, N 3.09. Calcd for  $\text{C}_{49}\text{H}_{41}\text{AuN}_2\text{S}\cdot 2\text{H}_2\text{O}$ : C 63.77, H 4.91, N 3.04.

**$[\text{Au}\{4\text{-}t\text{BuC}^{\wedge}\text{C}(4\text{-}t\text{BuC}_6\text{H}_4)^{\wedge}\text{N}(2\text{-thpy})\}(\text{Cbz})]$  (4)**

Yellow solid. Yield: 113 mg, 68 %.  $^1\text{H}$  NMR (500 MHz,  $\text{CDCl}_3$ , 298 K, relative to  $\text{Me}_4\text{Si}$ ,  $\delta/\text{ppm}$ ):  $\delta$  8.34–8.33 (d,  $J = 5.8$  Hz, 1H, thienopyridyl proton), 8.27–8.26 (m, 2H, carbazolyl protons), 8.10–8.08 (m, 2H, phenyl proton and carbazolyl proton), 7.85–7.84 (d,  $J = 5.7$  Hz, 1H, thienopyridyl proton), 7.70–7.63 (m, 6H, thienopyridyl proton and phenyl protons and carbazolyl proton), 7.59–7.57 (m, 2H, thienopyridyl proton and phenyl proton), 7.38–7.36 (d,  $J = 8.0$  Hz, 1H, phenyl proton), 7.31–7.27 (m, 2H, carbazolyl protons), 7.18–7.16 (dd,  $J = 8.0$  and 1.9 Hz, 1H, phenyl proton), 7.14–7.11 (m, 2H, carbazolyl protons), 6.73 (d,  $J = 1.9$  Hz, 1H, phenyl proton), 1.43 (s, 9H,  $-t$ Bu), 0.90 (s, 9H,  $-t$ Bu).  $^{13}\text{C}\{^1\text{H}\}$  NMR (125 MHz,  $\text{CDCl}_3$ , 298 K, relative to  $\text{Me}_4\text{Si}$ ,  $\delta/\text{ppm}$ ):  $\delta$  166.11, 160.32, 152.83, 151.77, 151.73, 151.61, 151.00, 148.31, 148.23, 142.87, 142.09, 141.31, 138.71, 132.89, 132.05, 131.15, 127.05, 126.02, 125.34, 124.76, 124.00, 123.42, 122.16, 122.08, 121.60, 119.95, 118.07, 116.25, 113.72, 67.98, 65.86, 34.68, 25.62. HRMS (Positive ESI): Found  $m/z$  836.2471  $[\text{M}]^+$ . Calcd for  $\text{AuC}_{45}\text{H}_{39}\text{N}_2\text{S}$   $[\text{M}]^+$ :  $m/z$  836.2494. Elemental analyses: Found (%): C 64.17, H 4.78, N 3.42. Calcd for  $\text{C}_{45}\text{H}_{39}\text{AuN}_2\text{S}$ : C 64.59, H 4.70, N 3.35.

**$[\text{Au}\{4\text{-}t\text{BuC}^{\wedge}\text{C}(4\text{-}t\text{BuC}_6\text{H}_4)^{\wedge}\text{N}(2\text{-thpy})\}(\text{Bu}_2\text{Cbz})]$  (5)**

Orange solid. Yield: 88 mg, 82 %.  $^1\text{H}$  NMR (500 MHz,  $\text{CDCl}_3$ , 298 K, relative to  $\text{Me}_4\text{Si}$ ,  $\delta/\text{ppm}$ ):  $\delta$  8.34–8.33 (d,  $J = 5.8$  Hz, 1H, thienopyridyl proton), 8.31–8.30 (d,  $J = 6.1$  Hz, 1H, thienopyridyl proton), 8.24 (d,  $J = 1.9$  Hz, 2H, carbazolyl protons), 8.10 (d,  $J$

= 1.0 Hz, 1H, phenyl proton), 7.85–7.84 (d,  $J = 5.8$  Hz, 1H, thienopyridyl proton), 7.75–7.74 (d,  $J = 6.1$  Hz, 1H, thienopyridyl proton), 7.67–7.65 (d,  $J = 8.3$  Hz, 2H, phenyl protons), 7.61 (d,  $J = 0.9$  Hz, 1H, phenyl proton), 7.59–7.57 (d,  $J = 8.3$  Hz, 2H, phenyl protons), 7.52–7.50 (d,  $J = 8.5$  Hz, 2H, carbazolyl protons), 7.35–7.32 (m, 3H, phenyl proton and carbazolyl protons), 7.14–7.12 (dd,  $J = 8.0$  and 1.9 Hz, 1H, phenyl proton), 6.62–6.61 (d,  $J = 1.9$  Hz, 1H, phenyl proton), 1.47 (s, 18H,  $-t$ Bu), 1.42 (s, 9H,  $-t$ Bu), 0.87 (s, 9H,  $-t$ Bu).  $^{13}\text{C}\{^1\text{H}\}$  NMR (125 MHz,  $\text{CDCl}_3$ , 298 K, relative to  $\text{Me}_4\text{Si}$ ,  $\delta/\text{ppm}$ ):  $\delta$  166.51, 160.40, 152.81, 151.80, 151.42, 150.95, 148.17, 147.02, 142.93, 141.99, 141.59, 138.91, 138.83, 132.88, 132.29, 131.04, 127.07, 126.02, 125.25, 124.59, 123.39, 122.12, 121.84, 121.45, 118.04, 115.60, 113.20, 34.70, 34.62, 32.27, 31.43, 30.76. HRMS (Positive ESI): Found  $m/z$  948.3710  $[\text{M}]^+$ . Calcd for  $\text{AuC}_{53}\text{H}_{55}\text{N}_2\text{S}$   $[\text{M}]^+$ :  $m/z$  948.3746. Elemental analyses: Found (%): C 66.00, H 5.79, N 3.01. Calcd for  $\text{C}_{53}\text{H}_{55}\text{AuN}_2\text{S}\cdot\text{H}_2\text{O}$ : C 65.83, H 5.94, N 2.90.

**[Au{4- $t$ BuC<sup>4</sup>(4- $t$ BuC<sub>6</sub>H<sub>4</sub>)<sup>2</sup>N<sub>2</sub>thq}(Cbz)] (6)**

Orange solid. Yield: 142 mg, 81 %.  $^1\text{H}$  NMR (500 MHz,  $\text{CDCl}_3$ , 298 K, relative to  $\text{Me}_4\text{Si}$ ,  $\delta/\text{ppm}$ ):  $\delta$  8.76–8.74 (d,  $J = 8.8$  Hz, 1H, thienoquinolinyl proton), 8.51–8.50 (d,  $J = 5.7$  Hz, 1H, thienoquinolinyl proton), 8.27–8.26 (m, 3H, phenyl proton and carbazolyl protons), 8.08–8.06 (d,  $J = 8.0$  Hz, 1H, thienoquinolinyl proton), 7.84–7.83 (d,  $J = 5.6$  Hz, 1H, thienoquinolinyl proton), 7.68–7.67 (m, 2H, phenyl proton and carbazolyl proton), 7.64–7.58 (m, 5H, phenyl protons and carbazolyl proton), 7.39–7.38 (m, 1H, thienoquinolinyl proton), 7.30–7.28 (d,  $J = 7.9$  Hz, 1H, phenyl proton), 7.25–7.21 (m, 2H, carbazolyl protons), 7.11–7.08 (m, 2H, carbazolyl protons), 7.06–7.04 (dd,  $J = 7.9$  and 1.9 Hz, 1H, phenyl proton), 7.00–6.95 (m, 1H, thienoquinolinyl proton), 5.73–5.72 (d,  $J = 1.9$  Hz, 1H, phenyl proton), 1.43 (s, 9H,  $-t$ Bu), 0.72 (s, 9H,  $-t$ Bu).  $^{13}\text{C}\{^1\text{H}\}$  NMR (125 MHz,  $\text{CDCl}_3$ , 298 K, relative to  $\text{Me}_4\text{Si}$ ,  $\delta/\text{ppm}$ ):  $\delta$  167.16, 162.36, 151.72, 151.55, 151.36, 151.03, 150.77, 148.85, 148.36, 144.13, 142.44, 141.90, 138.55, 131.23, 130.81, 130.34, 128.59, 128.14, 128.01, 127.03, 126.04, 126.01, 124.72, 124.67, 124.10, 124.05, 122.93, 122.15, 121.38, 119.76, 116.47, 114.04, 34.69, 34.62. HRMS (Positive ESI): Found  $m/z$  886.2621  $[\text{M}]^+$ . Calcd for  $\text{AuC}_{49}\text{H}_{41}\text{N}_2\text{S}$   $[\text{M}]^+$ :  $m/z$  886.2650. Elemental analyses: Found (%): C 63.70, H 4.64, N 3.10. Calcd for  $\text{C}_{49}\text{H}_{41}\text{AuN}_2\text{S}\cdot 2\text{H}_2\text{O}$ : C 63.77, H 4.91, N 3.04.



**Molecular orientation measurements.** The gold(III) complexes doped in 3,3'-di(9*H*-carbazol-9-yl)biphenyl (*m*-CBP) thin films were prepared by thermal evaporation on top of precleaned bare silicon substrates. The refractive index and thickness of the films were then determined by the alpha-SE Ellipsometer (J. A. Woollam). Then, 20-nm thick thin films were fabricated on glass substrates that were carefully pre-washed in the same manner as the fused silica substrates. The dipole orientation of the gold(III) complexes was estimated by the Photoluminescence Light Distribution Characteristic Measurement System (C13472-01, Hamamatsu Photonics). All the thin films were freshly prepared to avoid photodegradation of the materials during the measurement. The samples were then attached to a cylindrical lens, with the refractive index of 1.5, via matching oil, and mounted on an automated rotational stage with the film surface precisely positioned at the rotational center of the stage. Photoexcitation of the samples ( $\lambda = 365$  nm, Power =  $\sim 1.5$  mW) was performed using a fiber-guided LED output source. The emission from the sample was then collected by a Photonic Multi-Channel Analyzer PMA-12 (C10027-01, Hamamatsu Photonics) through a long-pass filter and a transverse magnetic (TM) mode polarizer. The estimated  $p_z$  and order parameter ( $S$ ) were calculated by the Standard Software (U6039-09, Hamamatsu Photonics), and the angle  $\theta$  between the normal of a substrate and transition dipole was then calculated by the equation,  $S = \frac{3\langle \cos^2 \theta \rangle - 1}{2}$ , with the bracketed values  $\langle \dots \rangle$  indicating an ensemble average of  $\langle \cos^2 \theta \rangle$ .<sup>2</sup> The ratio of the horizontal dipoles to the total dipoles of the emitters ( $\Theta$ ) is obtained by the equation  $\Theta:(1 - \Theta) = \langle \sin^2 \theta \rangle : \langle \cos^2 \theta \rangle = h:v$ .<sup>10,11</sup>

**Computational details.** All calculations were carried out with the Gaussian 09 suite of programs.<sup>17</sup> By density functional theory (DFT), the ground-state ( $S_0$ ) geometries of complexes **1**, **3**, **4** and **6** were fully optimized in toluene with the hybrid Perdew, Burke, and Ernzerhof (PBE0) functional,<sup>18–20</sup> in conjunction with the conductor-like polarizable continuum model (CPCM).<sup>21,22</sup> Time-dependent density functional theory<sup>23–25</sup> (TDDFT) calculations at the same level associated with CPCM were then carried out on the optimized  $S_0$  geometries to compute the singlet-singlet transitions in the electronic absorption spectra of **1**, **3**, **4** and **6**. In order to investigate the nature of the emissive states, the geometries of the lowest-lying triplet excited states ( $T_1$ ) were optimized with the unrestricted UPBE0/CPCM method for **1**, **3**, **4** and **6**. On the basis of the optimized  $S_0$  and  $T_1$  geometries, vibrational frequencies were calculated and all stationary points were verified to be minima on the potential energy surface, as there are no imaginary frequencies observed (NIMAG = 0). In order to gain further insights into the excited states involved in thermally activated delayed fluorescence (TADF) and to compute the  $\Delta E_{ST}$  value, the geometries of the lowest singlet excited state ( $S_1$ ) and the  $T_1$  state of **1** were optimized using TDDFT with the PBE0 functional.<sup>18–20</sup> The Cartesian coordinates of the optimized ground- and excited-state geometries are given in **Tables S7–S16**. For all the calculations, the Stuttgart effective core potentials (ECPs) and the associated basis set were used to describe Au<sup>26</sup> with f-type polarization functions ( $\zeta = 1.050$ ),<sup>27</sup> while the 6-31G(d,p) basis set<sup>28–30</sup> was applied for all other atoms. All the DFT and TDDFT calculations were carried out with a pruned (99,590) grid for numerical integration.

**OLED fabrication and measurements.** OLEDs were fabricated on patterned ITO-coated glass substrates. The substrates were cleaned with Decon 90, rinsed with deionized water, then dried in an oven, and finally treated in an ultraviolet ozone chamber. A 40-nm-thick PEDOT:PSS was spin-coated onto the ITO-coated glass substrates as hole-transporting layer. After that, emissive layer was formed by mixing dendrimers with MCP to prepare a  $10 \text{ mg cm}^{-3}$  solutions in chloroform and spin-coating onto PEDOT:PSS layer to give 30-nm-thick uniform thin film. After spin-coating, the substrates were mounted onto the sample holder inside the Trovato Vacuum Deposition System and pumped down to high vacuum with base pressure better than  $5 \times 10^{-7}$  Torr. Sequential vapor deposition of a 5-nm-thick 3TPYMB as a hole-blocking layer and a 40-nm-thick TmPyPB as an electron-transporting layer were made onto the PEDOT:PSS layer. Finally, a 1-nm thick LiF and a 150-nm thick Al were deposited as the metal cathode. For the vacuum-deposited OLEDs, sequential thermal evaporation of  $\alpha$ -NPD (40 nm), TCTA (5 nm), emissive layer, Tm3PyP26PyB (50 nm), LiF (1 nm) and Al (150 nm) were made onto the ITO substrate, in which  $\alpha$ -NPD, TCTA, and Tm3PyP26PyB were used as hole-transporting, exciton-blocking and electron-transporting layers, respectively. The emissive layer was prepared by co-evaporating Au(III) complex and *m*-CBP as host simultaneously. All the organic materials and metals were put in separate tantalum boats and vapor deposited by resistive heating. All the films were sequentially deposited at a rate of  $0.1\text{--}0.2 \text{ nm s}^{-1}$  without vacuum break. A quartz crystal was equipped in the vacuum deposition system, with which by monitoring the change in resonant frequency due to the additional mass of material deposition onto this crystal, the thickness and deposition rate could be monitored. A shadow mask was used to define the cathode and to make four  $0.1 \text{ cm}^2$  devices on each substrate. Current density–voltage–luminance characteristics and EL spectra were measured simultaneously with a programmable Keithley model 2420 power source and a Photoresearch PR-655 spectrometer. The operational lifetime of the vacuum-deposited device was measured by a McScience M6000 OLED lifetime test system.

# NMR spectra.

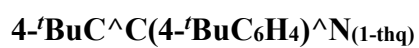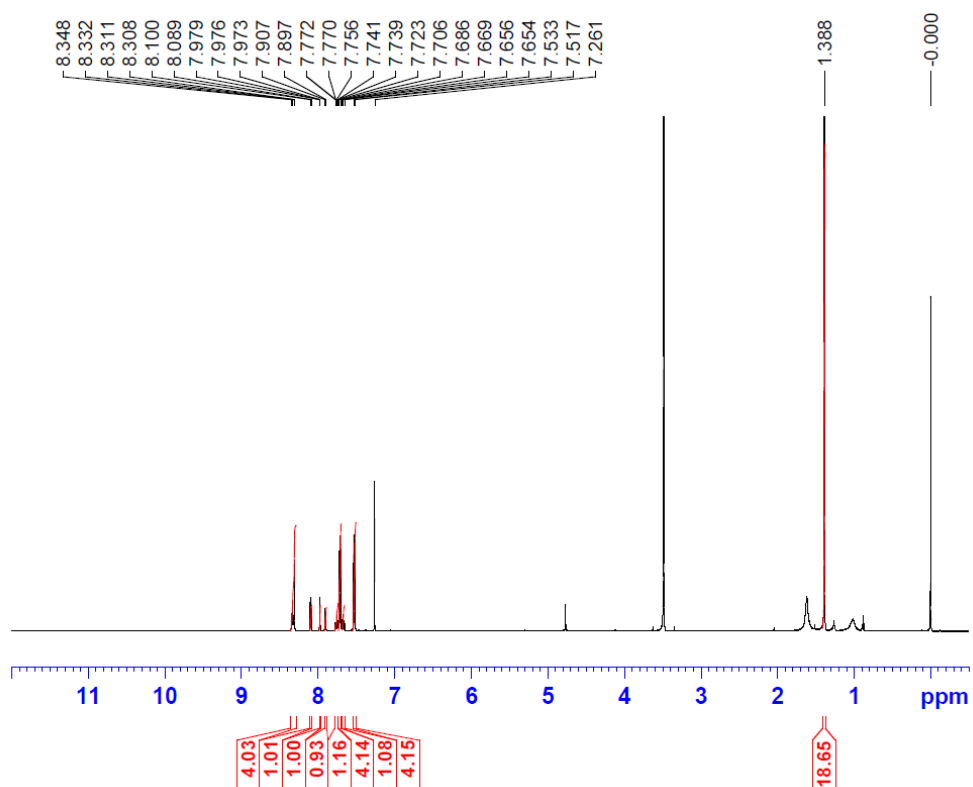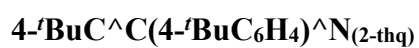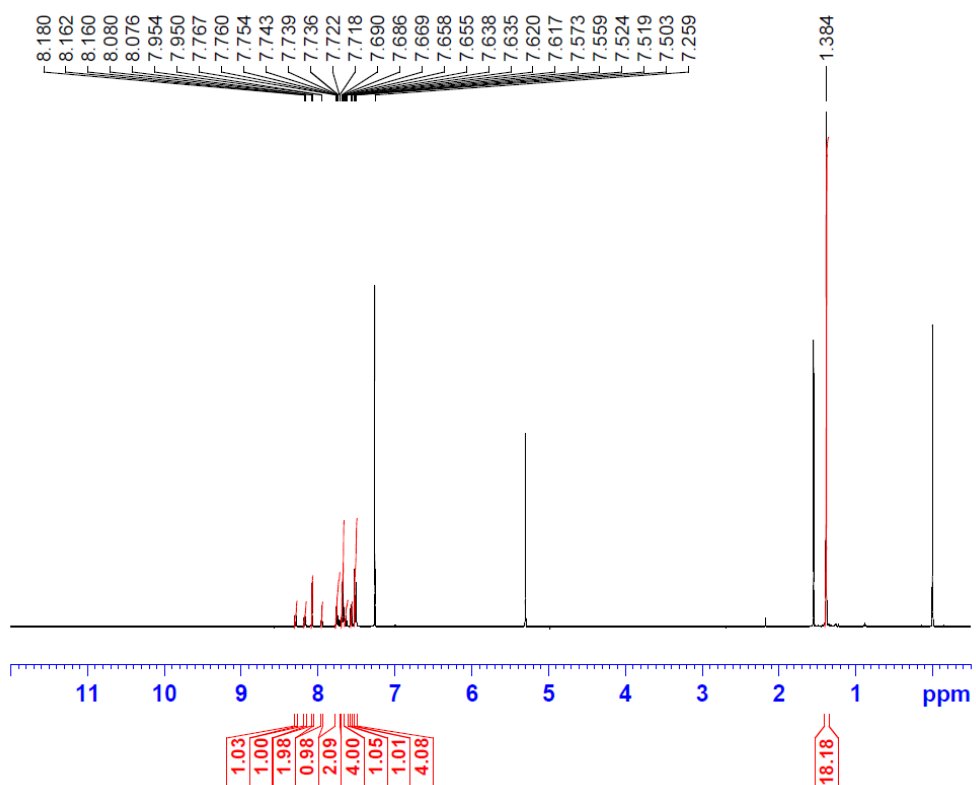

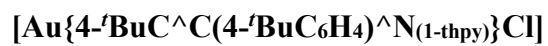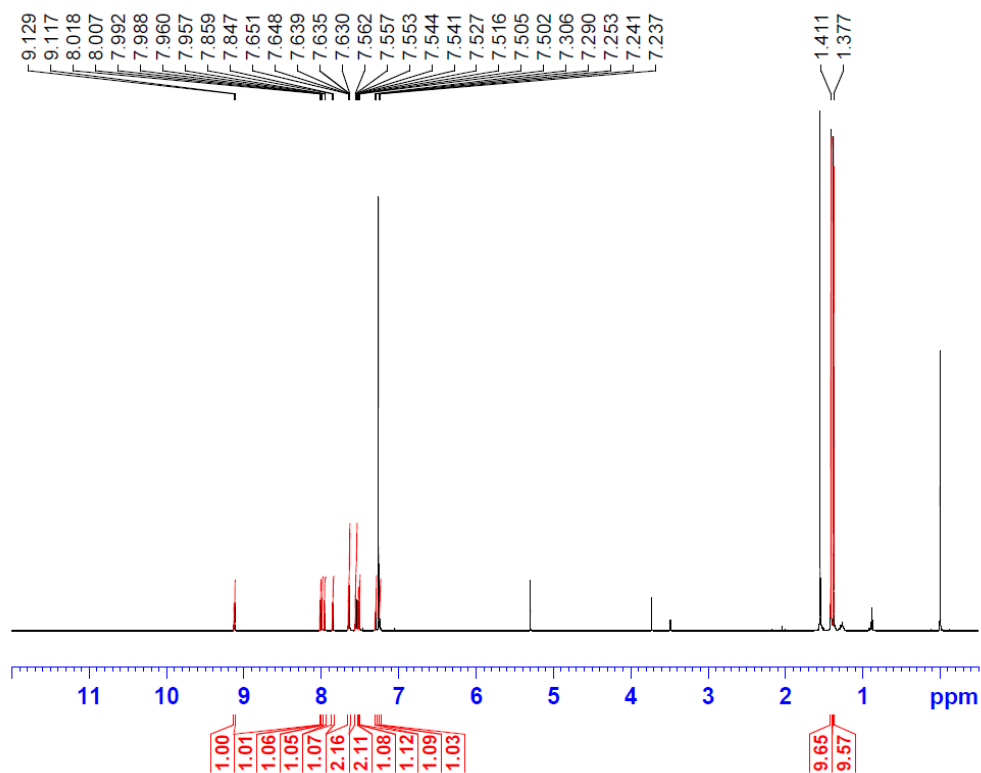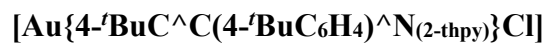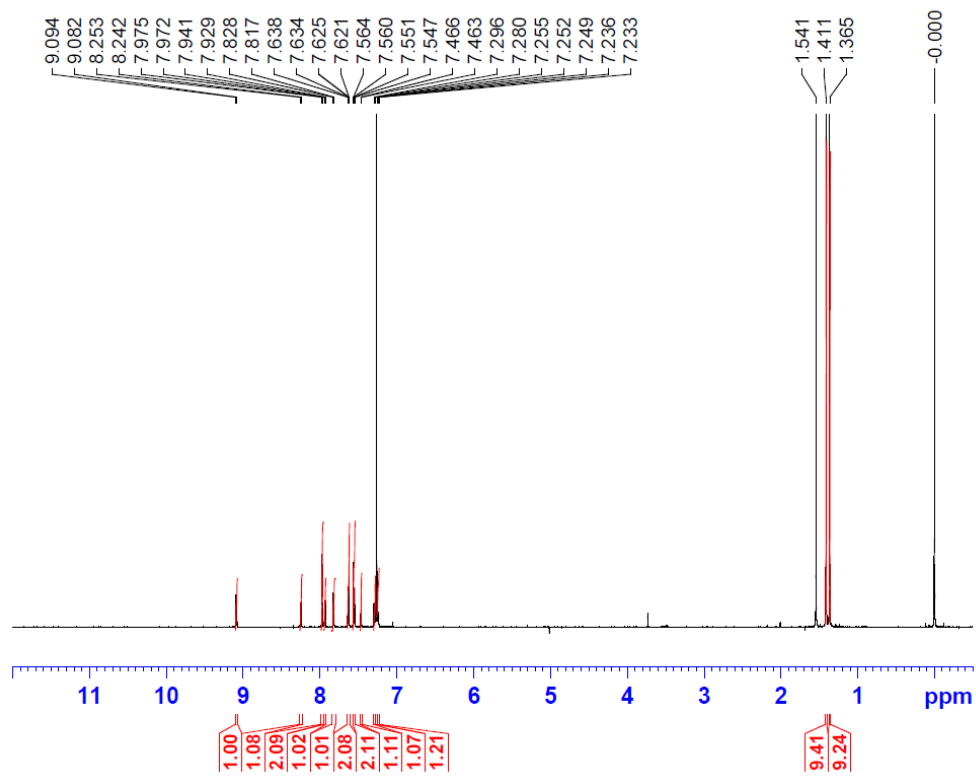

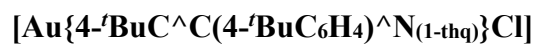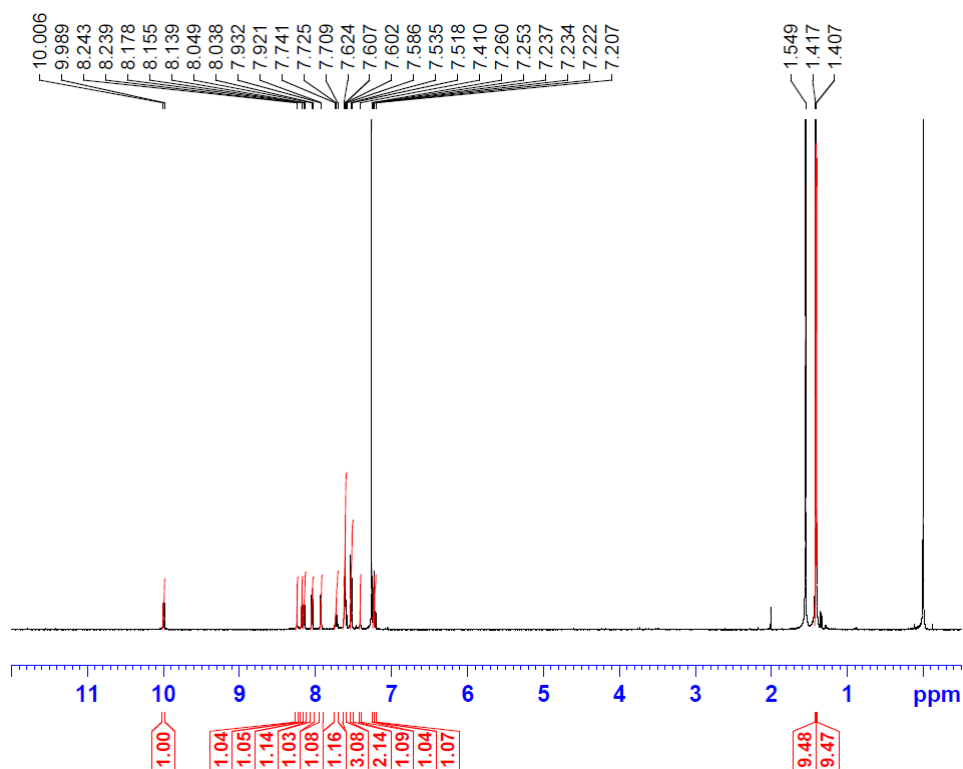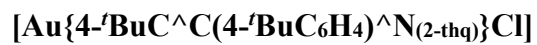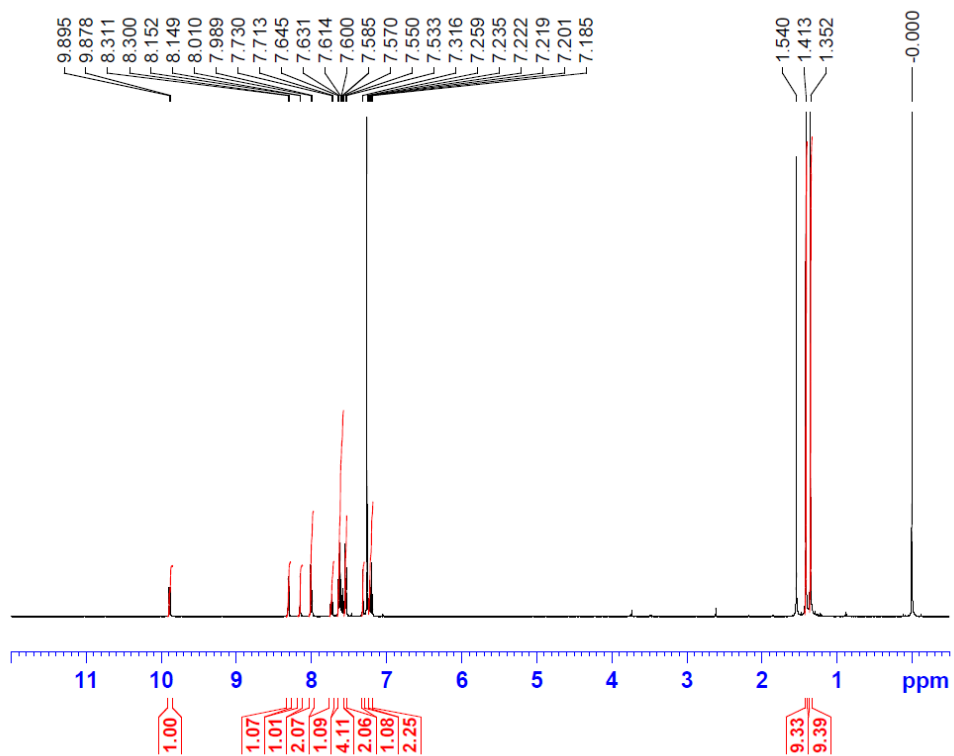

[Au{4-<sup>t</sup>BuC<sup>^</sup>C(4-<sup>t</sup>BuC<sub>6</sub>H<sub>4</sub>)<sup>^</sup>N(1-thpy)}](Cbz) (1)

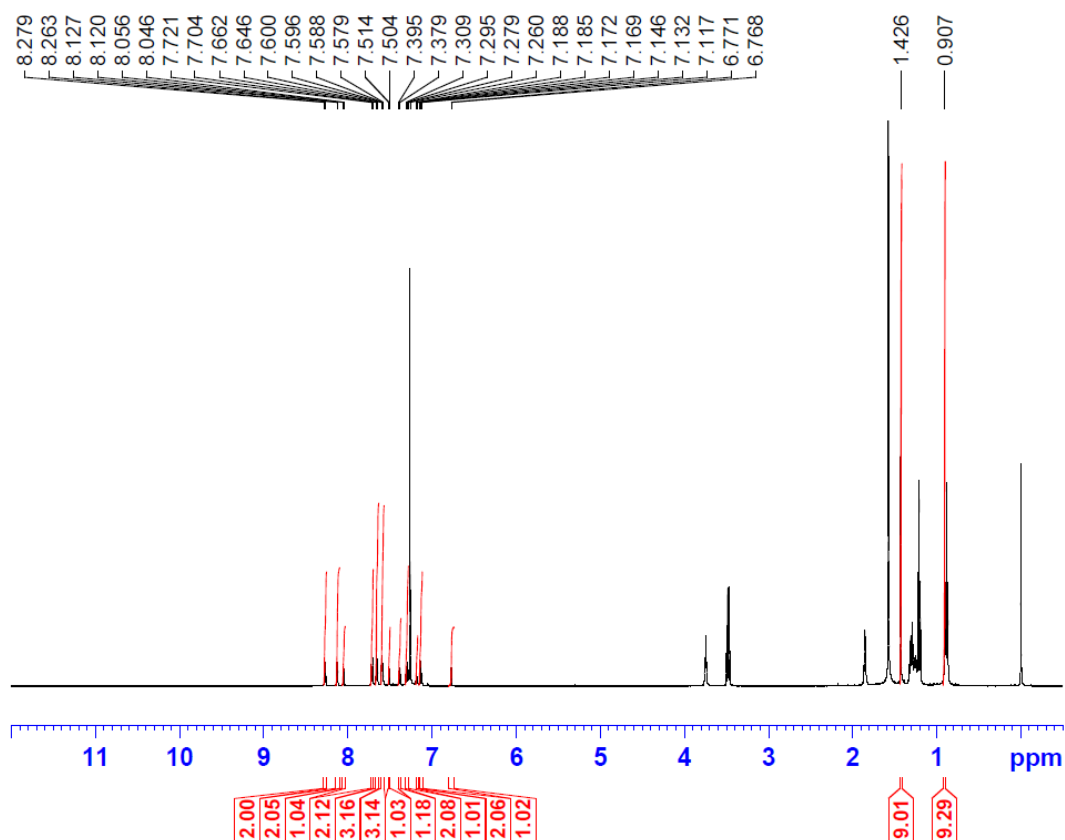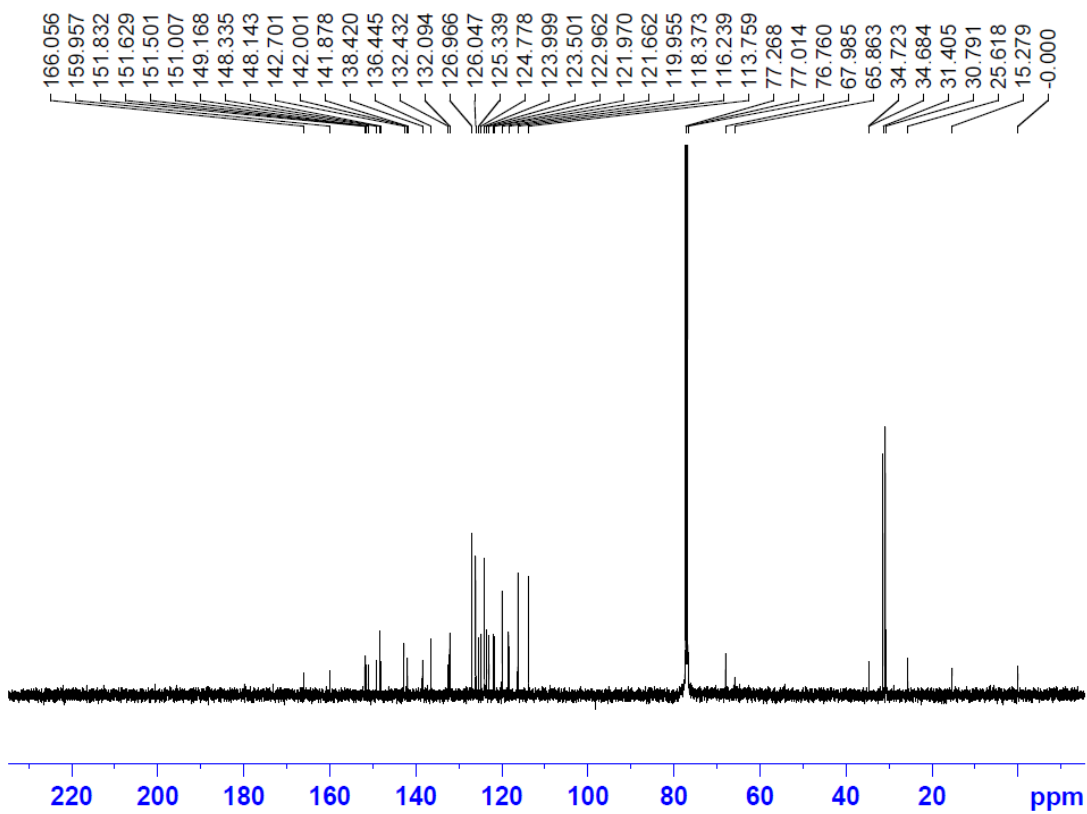

[Au{4-<sup>t</sup>BuC<sup>^</sup>C(4-<sup>t</sup>BuC<sub>6</sub>H<sub>4</sub>)<sup>^</sup>N(1-thpy)}](<sup>t</sup>Bu<sub>2</sub>Cbz) (2)

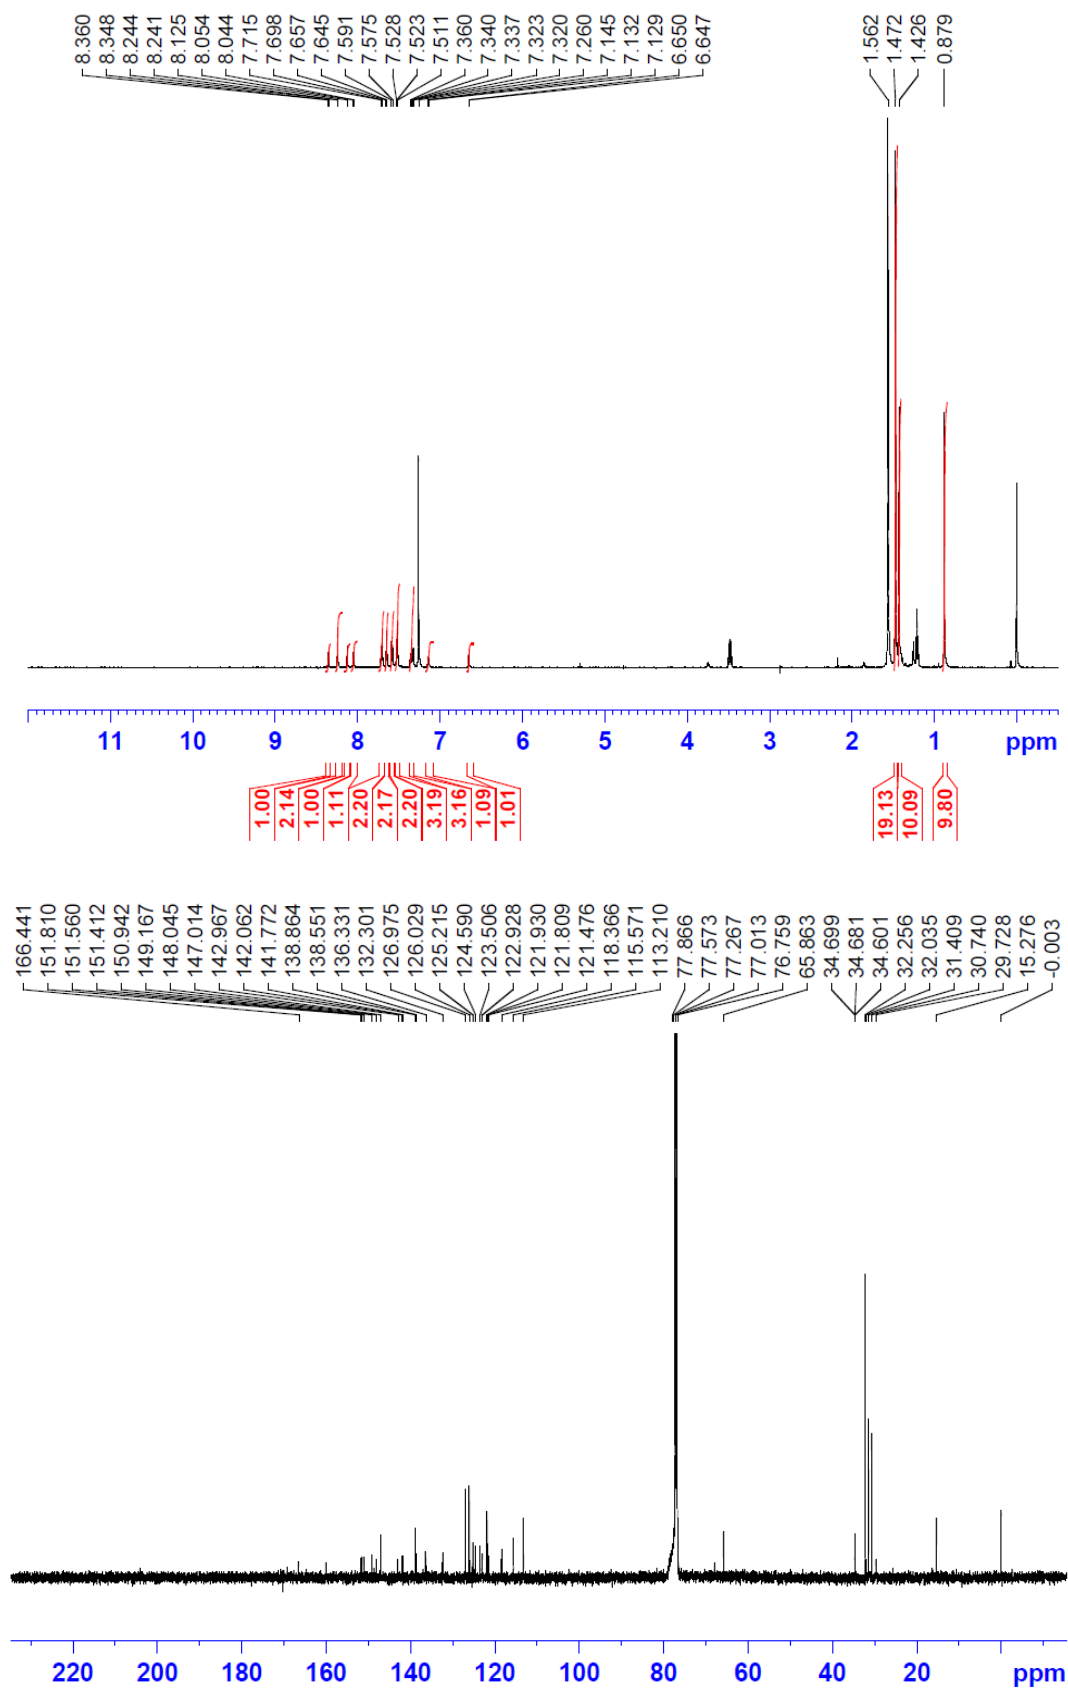



[Au{4-<sup>t</sup>BuC<sup>^</sup>C(4-<sup>t</sup>BuC<sub>6</sub>H<sub>4</sub>)<sup>^</sup>N(1-thq)}(Cbz)] (3)

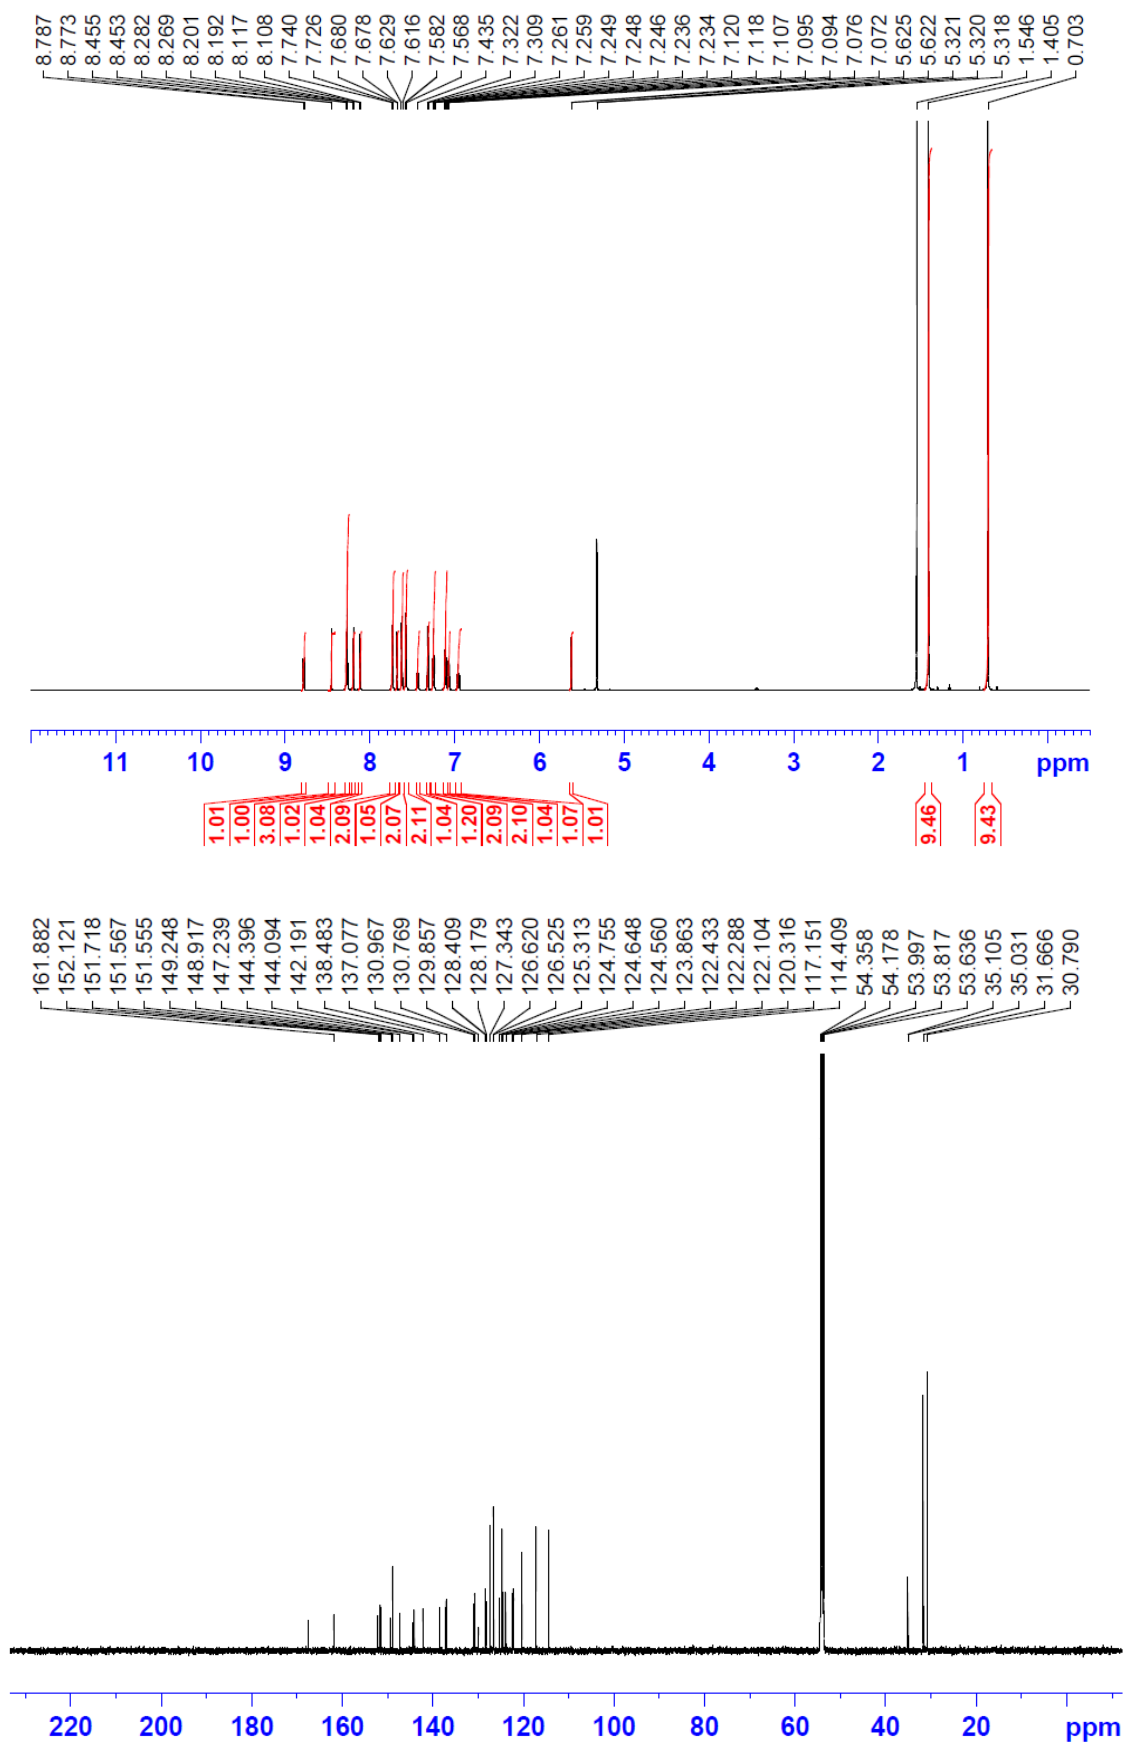

[Au{4-<sup>t</sup>BuC<sup>^</sup>C(4-<sup>t</sup>BuC<sub>6</sub>H<sub>4</sub>)<sup>^</sup>N(2-thpy)}](Cbz) (4)

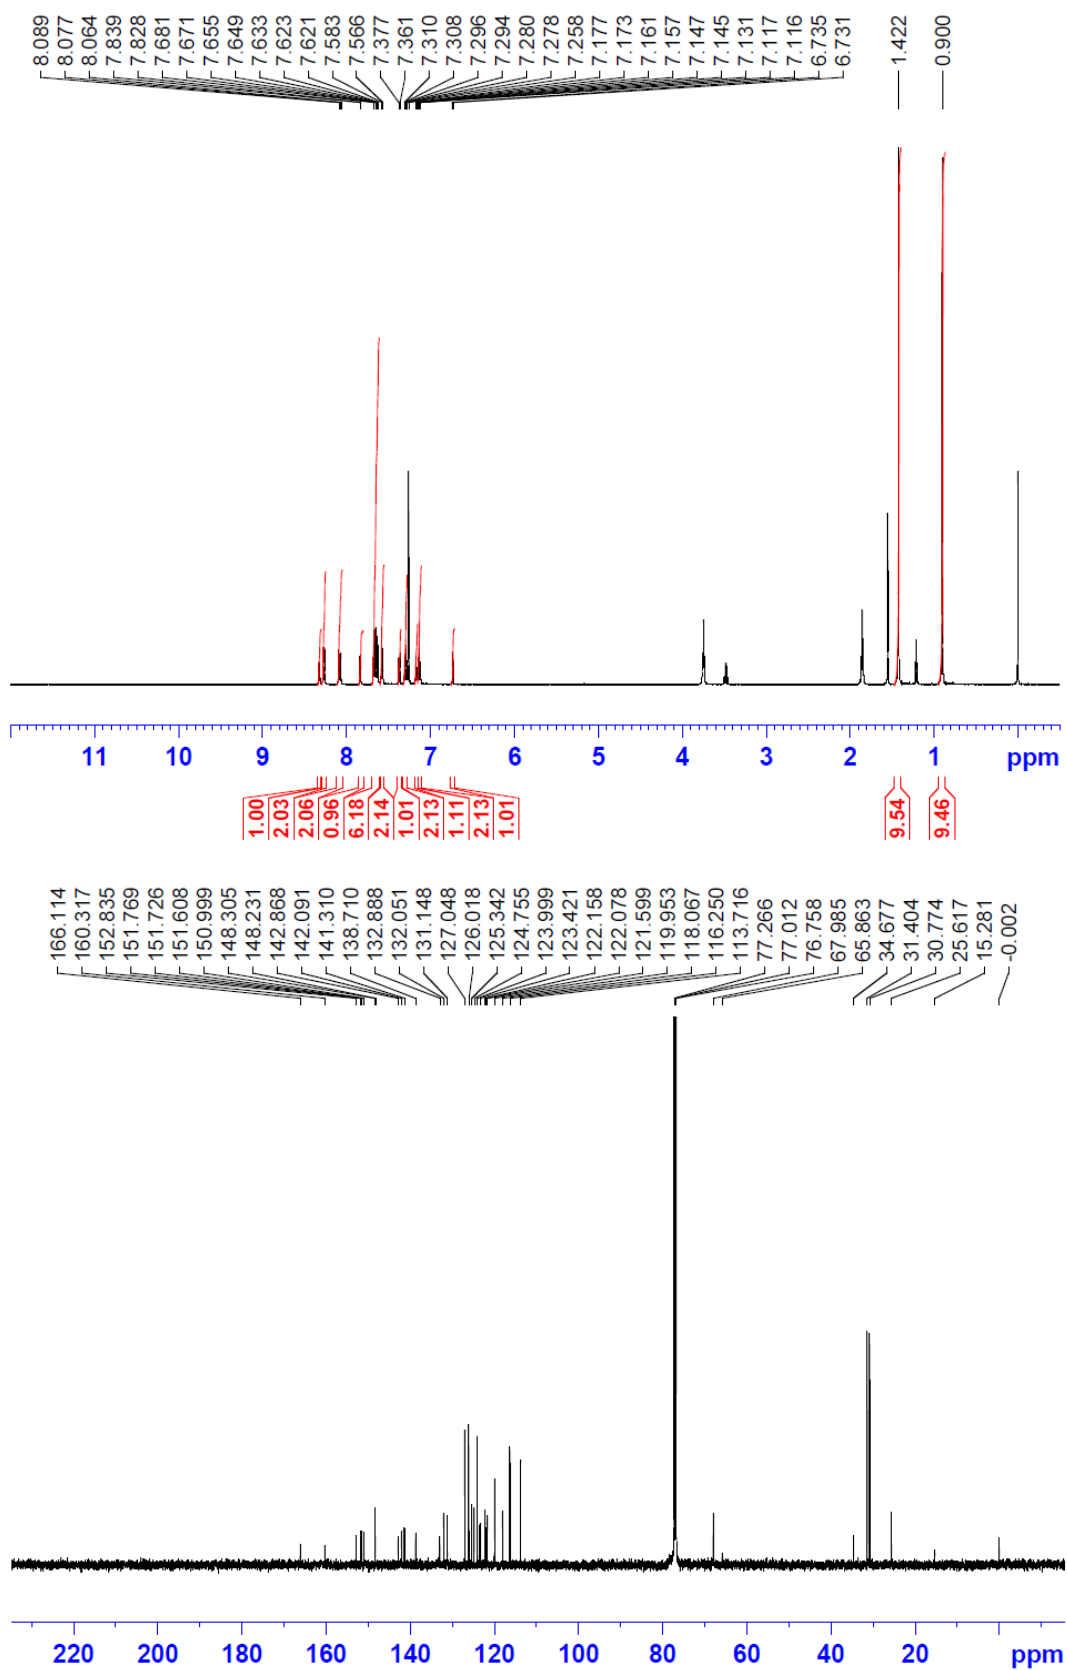

[Au{4-<sup>t</sup>BuC<sup>^</sup>C(4-<sup>t</sup>BuC<sub>6</sub>H<sub>4</sub>)<sup>^</sup>N(2-thpy)}](<sup>t</sup>Bu<sub>2</sub>Cbz) (5)

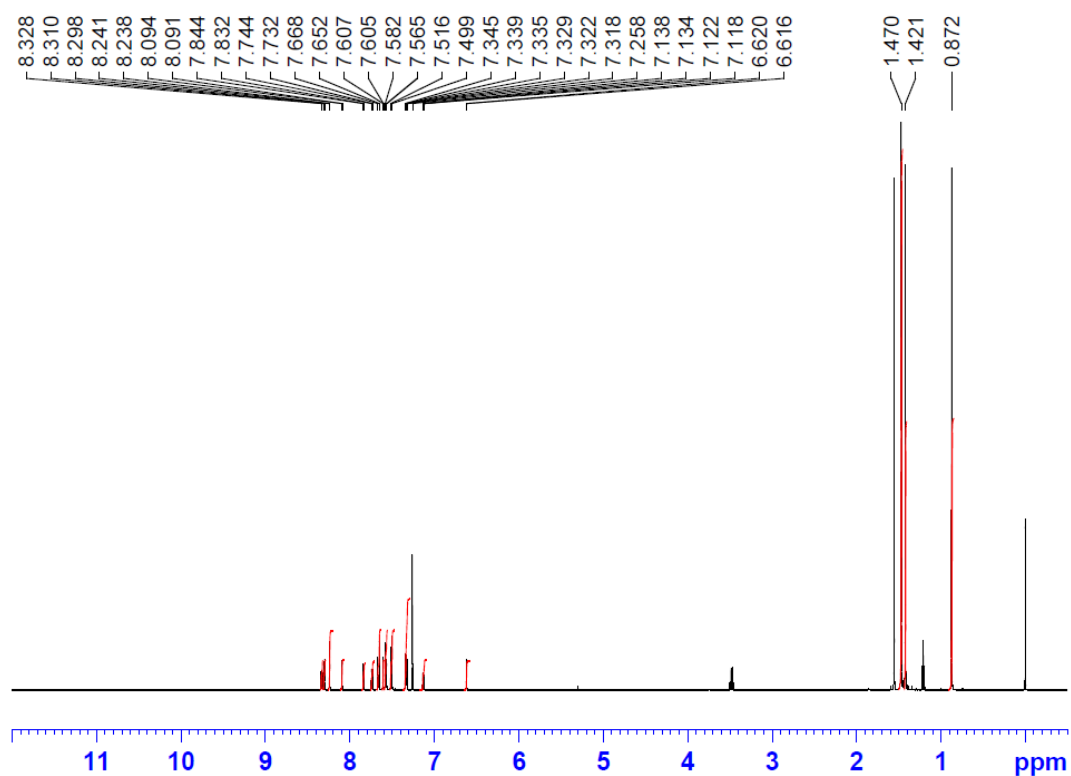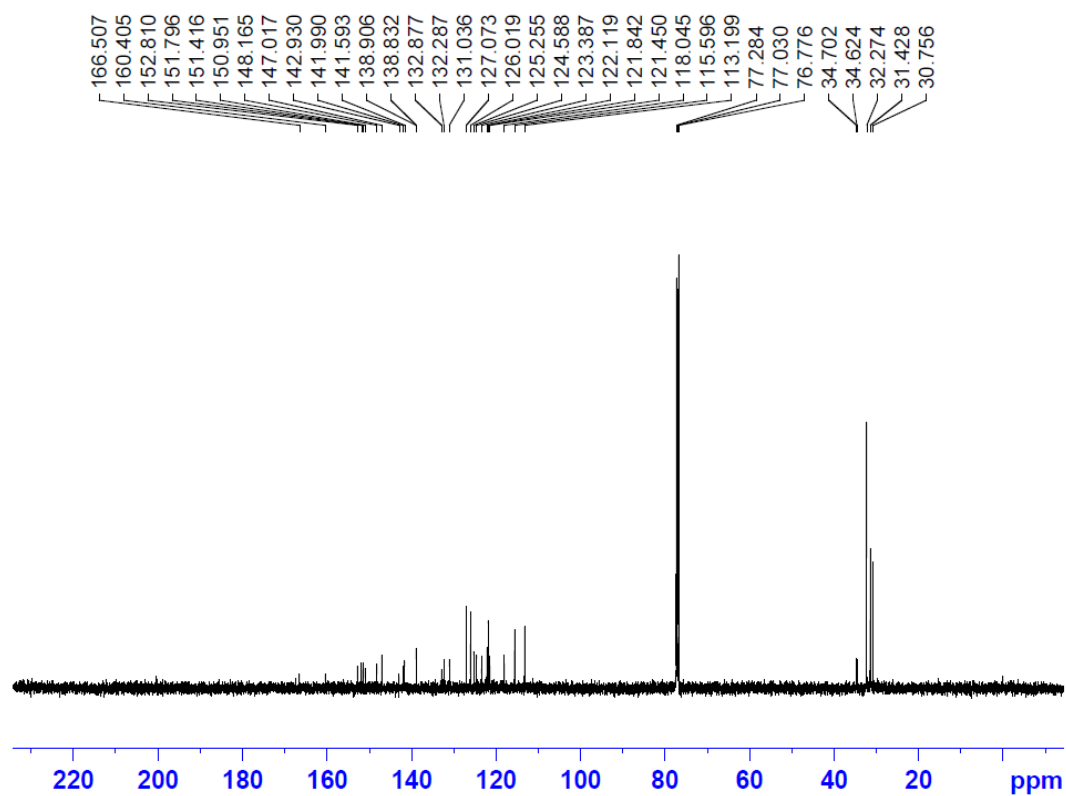

[Au{4-<sup>t</sup>BuC<sup>^</sup>C(4-<sup>t</sup>BuC<sub>6</sub>H<sub>4</sub>)<sup>^</sup>N(2-thq)}(Cbz)] (6)

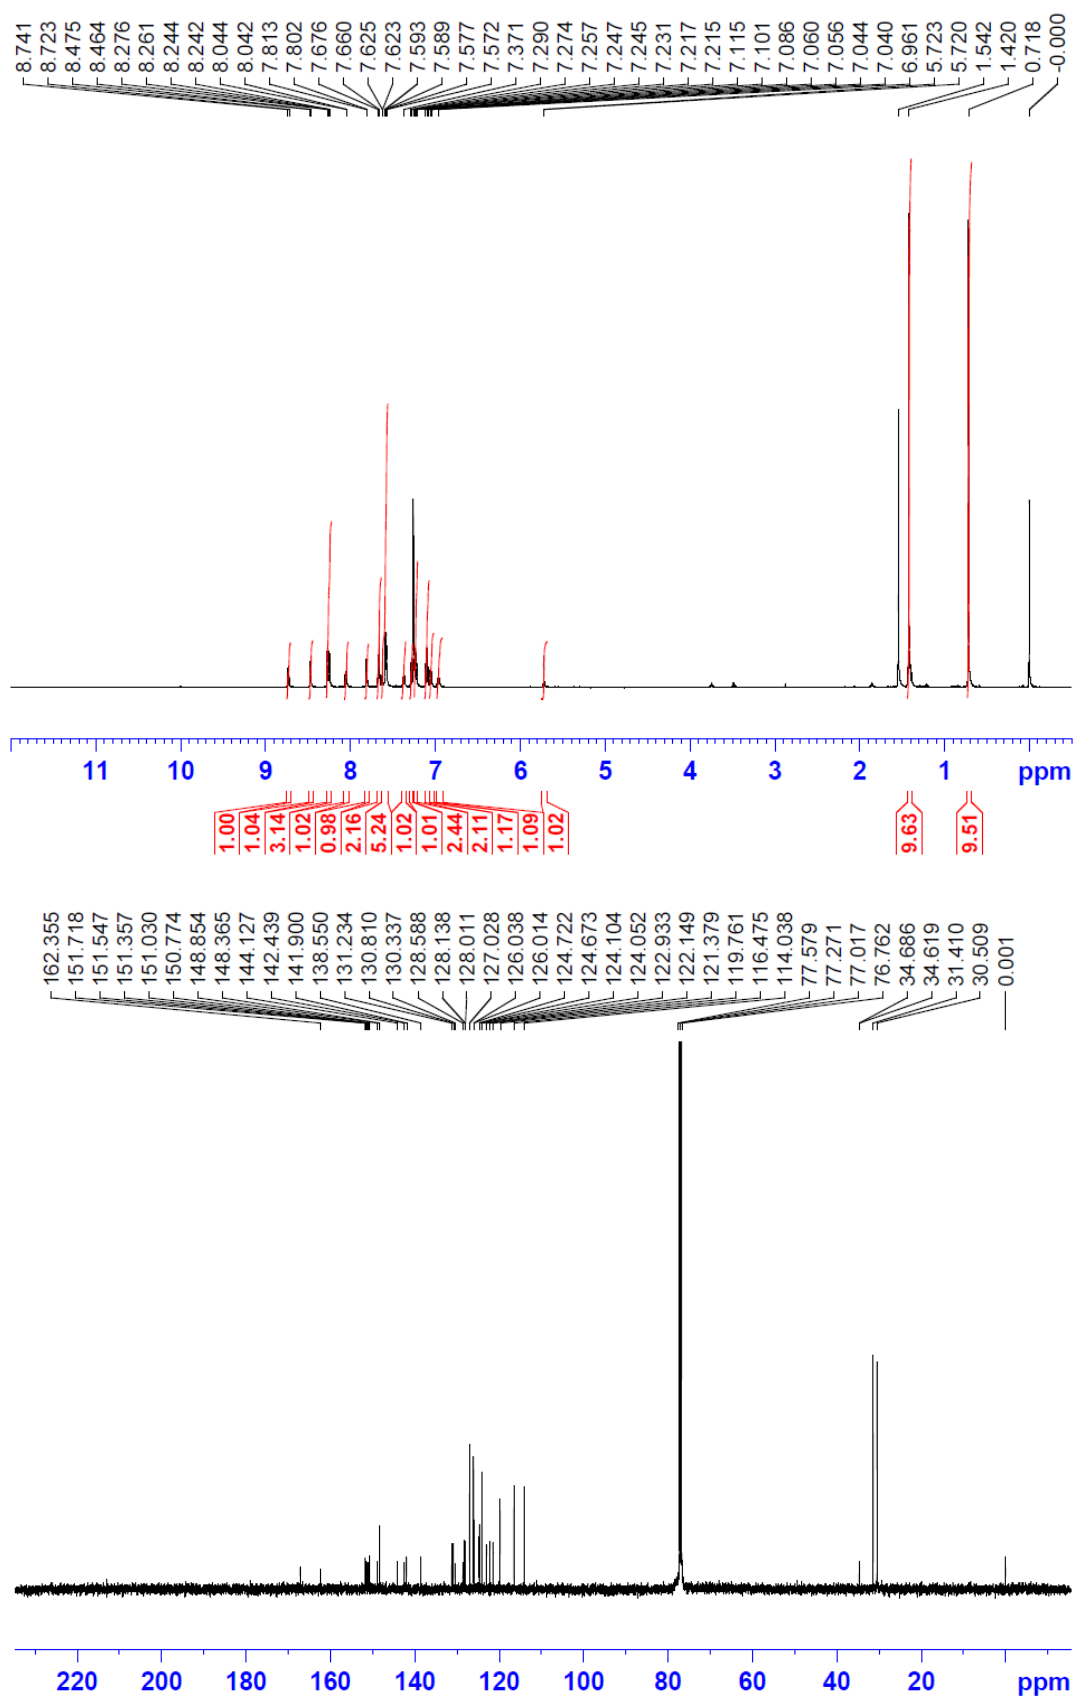

## ESI-mass spectra and the corresponding simulated isotope patterns

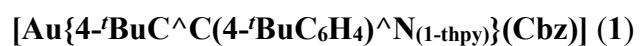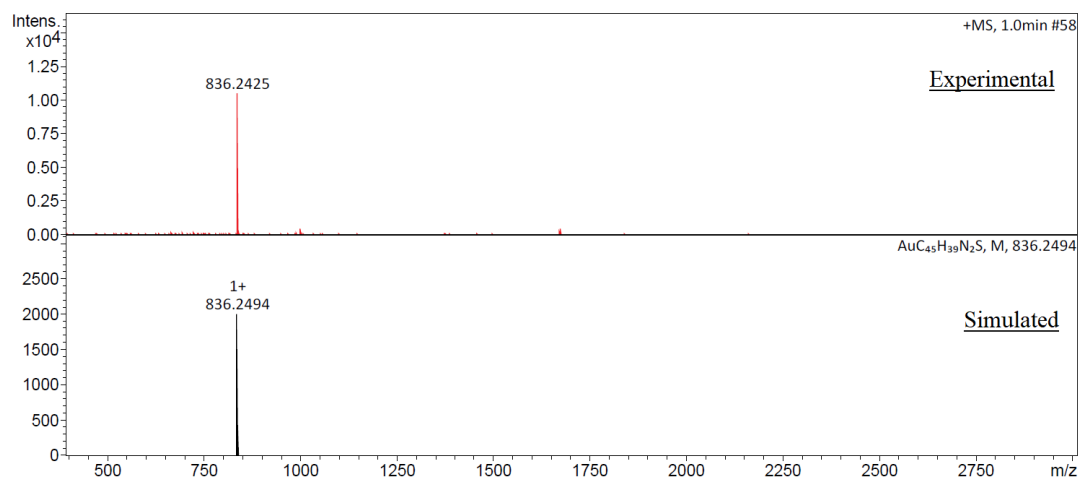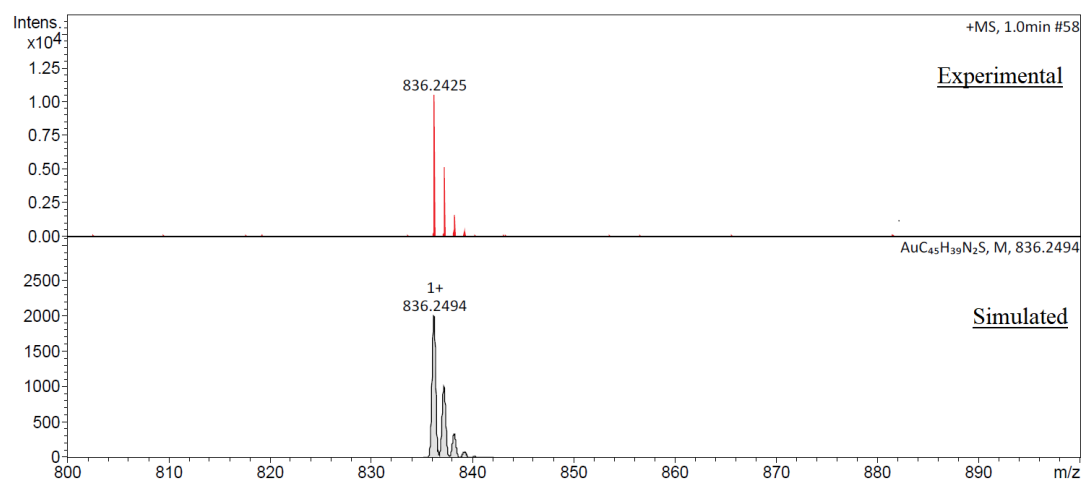

**[Au{4-<sup>t</sup>BuC<sup>^</sup>C(4-<sup>t</sup>BuC<sub>6</sub>H<sub>4</sub>)<sup>^</sup>N(2-thpy)}(Cbz)] (4)**

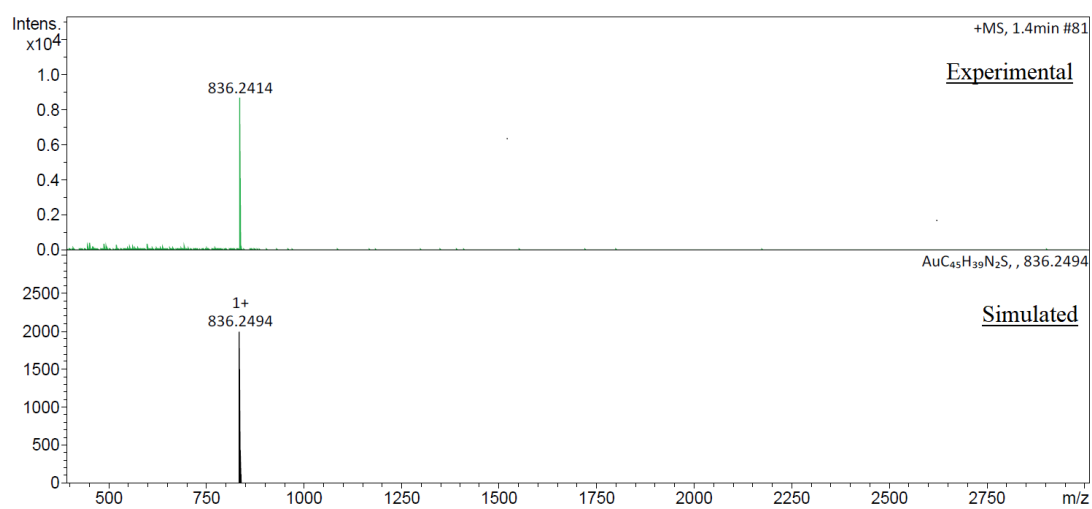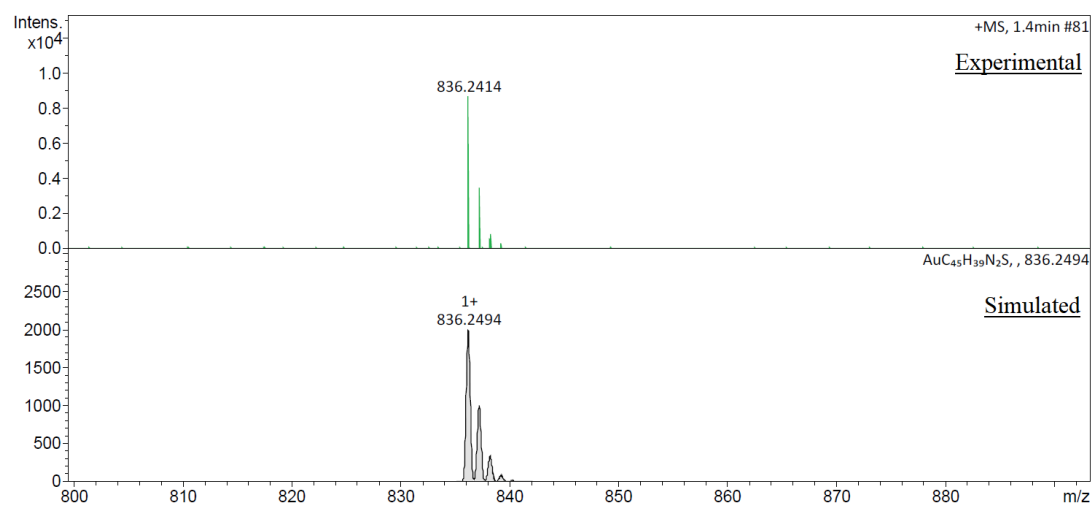

## References

1. N. G. Connelly and W. E. Geiger, *Chem. Rev.*, 1996, **96**, 877–910.
2. D. Yokoyama, *J. Mater. Chem.*, 2011, **21**, 19187–19202.
3. T. D. Schmidt, T. Lampe, D. Sylvinson M. R, P. I. Djurovich, M. E. Thompson and W. Brütting, *Phys. Rev. Appl.*, 2017, **8**, 037001.
4. K.-H. Kim and J.-J. Kim, *Adv. Mater.*, 2018, **30**, 1705600.
5. J. Ràfols-Ribé, P.-A. Will, C. Hänisch, M. Gonzalez-Silveira, S. Lenk, J. Rodríguez-Viejo and S. Reineke, *Sci. Adv.*, 2018, **4**, eaar8332.
6. T. Komino, H. Tanaka and C. Adachi, *Chem. Mater.*, 2014, **26**, 3665-3671.
7. K.-H. Kim, S. Lee, C.-K. Moon, S.-Y. Kim, Y.-S. Park, J.-H. Lee, J. Woo Lee, J. Huh, Y. You and J.-J. Kim, *Nat. Commun.*, 2014, **5**, 4769.
8. K.-H. Kim, E. S. Ahn, J.-S. Huh, Y.-H. Kim and J.-J. Kim, *Chem. Mater.*, 2016, **28**, 7505–7510.
9. K.-H. Kim, J.-L. Liao, S. W. Lee, B. Sim, C.-K. Moon, G.-H. Lee, H. J. Kim, Y. Chi and J.-J. Kim, *Adv. Mater.*, 2016, **28**, 2526–2532.
10. T. Marcato and C.-J. Shih, *Helv. Chim. Acta*, 2019, **102**, e1900048.
11. C.-K. Moon, *Molecular Orientation and Emission Characteristics of Ir Complexes and Exciplex in Organic Thin Films*, Springer, 2019.
12. G. A. Crosby and J. N. Demas, *J. Phys. Chem.*, 1971, **75**, 991–1024.
13. R. Kumar, A. Linden and C. Nevado, *Angew. Chem. Int. Ed.*, 2015, **54**, 14287–14290.
14. L.-K. Li, M.-C. Tang, S.-L. Lai, M. Ng, W.-K. Kwok, M.-Y. Chan and V. W.-W. Yam, *Nat. Photon.*, 2019, **13**, 185–191.
15. B. Jiang, X. Ning, S. Gong, N. Jiang, C. Zhong, Z.-H. Lu and C. Yang, *J. Mater. Chem. C*, 2017, **5**, 10220–10224.
16. W.-K. Kwok, M.-C. Tang, S.-L. Lai, W.-L. Cheung, L.-K. Li, M. Ng, M.-Y. Chan and V. W.-W. Yam, *Angew. Chem. Int. Ed.*, 2020, **59**, 9684–9692.
17. M. J. Frisch, G. W. Trucks, H. B. Schlegel, G. E. Scuseria, M. A. Robb, J. R. Cheeseman, G. Scalmani, V. Barone, B. Mennucci, G. A. Petersson, H. Nakatsuji, M. Caricato, X. Li, H. P. Hratchian, A. F. Izmaylov, J. Bloino, G. Zheng, J. L. Sonnenberg, M. Hada, M. Ehara, K. Toyota, R. Fukuda, J. Hasegawa, M. Ishida, T. Nakajima, Y. Honda, O. Kitao, H. Nakai, T. Vreven, J. Montgomery, J. A., J. E. Peralta, F. Ogliaro, M. Bearpark, J. J. Heyd, E. Brothers,

- K. N. Kudin, V. N. Staroverov, T. Keith, R. Kobayashi, J. Normand, K. Raghavachari, A. Rendell, J. C. Burant, S. S. Iyengar, J. Tomasi, M. Cossi, N. Rega, J. M. Millam, M. Klene, J. E. Knox, J. B. Cross, V. Bakken, C. Adamo, J. Jaramillo, R. Gomperts, R. E. Stratmann, O. Yazyev, A. J. Austin, R. Cammi, C. Pomelli, J. W. Ochterski, R. L. Martin, K. Morokuma, V. G. Zakrzewski, G. A. Voth, P. Salvador, J. J. Dannenberg, S. Dapprich, A. D. Daniels, O. Farkas, J. B. Foresman, J. V. Ortiz, J. Cioslowski and D. J. Fox, *Gaussian*, 2013.
18. J. P. Perdew, K. Burke and M. Ernzerhof, *Phys. Rev. Lett.*, 1996, **77**, 3865–3868.
  19. J. P. Perdew, K. Burke and M. Ernzerhof, *Phys. Rev. Lett.*, 1997, **78**, 1396–1396.
  20. C. Adamo and V. Barone, *J. Chem. Phys.*, 1999, **110**, 6158–6170.
  21. V. Barone and M. Cossi, *J. Phys. Chem. A*, 1998, **102**, 1995–2001.
  22. M. Cossi, N. Rega, G. Scalmani and V. Barone, *J. Comput. Chem.*, 2003, **24**, 669–681.
  23. R. Bauernschmitt and R. Ahlrichs, *Chem. Phys. Lett.*, 1996, **256**, 454–464.
  24. M. E. Casida, C. Jamorski, K. C. Casida and D. R. Salahub, *J. Chem. Phys.*, 1998, **108**, 4439–4449.
  25. R. E. Stratmann, G. E. Scuseria and M. J. Frisch, *J. Chem. Phys.*, 1998, **109**, 8218–8224.
  26. D. Andrae, U. Häußermann, M. Dolg, H. Stoll and H. Preuß, *Theoret. Chim. Acta*, 1990, **77**, 123–141.
  27. A. W. Ehlers, M. Böhme, S. Dapprich, A. Gobbi, A. Höllwarth, V. Jonas, K. F. Köhler, R. Stegmann, A. Veldkamp and G. Frenking, *Chem. Phys. Lett.*, 1993, **208**, 111–114.
  28. W. J. Hehre, R. Ditchfield and J. A. Pople, *J. Chem. Phys.*, 1972, **56**, 2257–2261.
  29. P. C. Hariharan and J. A. Pople, *Theoret. Chim. Acta*, 1973, **28**, 213–222.
  30. M. M. Francl, W. J. Pietro, W. J. Hehre, J. S. Binkley, M. S. Gordon, D. J. DeFrees and J. A. Pople, *J. Chem. Phys.*, 1982, **77**, 3654–3665.
